# Supplementary material for: Insights into highly selective ring expansion of oxaziridines under Lewis base catalysis: a DFT study
Source: Royal Society of Chemistry journal article supplement (doi:10.1039/c8qo01370e), 2019-01-01
Supplement: c8qo01370e1.pdf [file c8qo01370e1.pdf]

**Electronic Supporting Information For**  
**Insights to highly selective ring expansion of oxaziridine under Lewis**  
**base catalysis: A DFT study**

Qiao-Chu Zhang<sup>a</sup>, Xue Li<sup>a</sup>, Xinghua Wang<sup>a</sup>, Shi-Jun Li<sup>a,\*</sup>, Ling-Bo Qu<sup>a</sup>, Yu Lan<sup>a,b</sup> and Donghui Wei<sup>a,\*</sup>

<sup>a</sup> The College of Chemistry and Molecular Engineering, Zhengzhou University, 100 Science Avenue, Zhengzhou, Henan 450001, P.R. China

<sup>b</sup> School of Chemistry and Chemical Engineering, Chongqing University, Chongqing, 400030, China

**Content**

|                                                                                                                                |           |
|--------------------------------------------------------------------------------------------------------------------------------|-----------|
| <b>Part I: Single-point energies of all stationary points.....</b>                                                             | <b>S2</b> |
| <b>Part II: The Gibbs free energy profiles of stereoselectivity-determining step (Step 4) with different method B3LYP.....</b> | <b>S3</b> |
| <b>Part III: Cs<sub>2</sub>CO<sub>3</sub>-assisted deprotonation process of pre-NHC.....</b>                                   | <b>S4</b> |
| <b>Part IV: Optimized structures and geometrical parameters of reactants, products, and all intermediates.....</b>             | <b>S5</b> |
| <b>Part V: Total energy along IRC of TS4R/S.....</b>                                                                           | <b>S6</b> |
| <b>Part VI: The direct reaction pathway between ketene and oxaziridine.....</b>                                                | <b>S7</b> |
| <b>Part VII: Coordinates of stationary points involved in the reaction.....</b>                                                | <b>S8</b> |

---

\*Corresponding Authors: [donghuiwei@zzu.edu.cn](mailto:donghuiwei@zzu.edu.cn) (D. H. Wei) and [lishijunzong@zzu.edu.cn](mailto:lishijunzong@zzu.edu.cn) (S.-J. Li)

## Part I: Single-point energies of all stationary points

**Table S1.** The single-point energies of all stationary points involved in the reaction calculated at M06-2X/6-311++G(2df, 2pd)//IEF-PCM<sub>1,4-dioxane</sub>

|                                    | single-point energies/a. u. |
|------------------------------------|-----------------------------|
| <i>p</i> -nitrobenzoic acid        | -625.307048                 |
| <b>R1</b>                          | -817.226052                 |
| <b>Cat</b>                         | -1052.231771                |
| <b>HCO<sub>3</sub><sup>-</sup></b> | -264.519184                 |
| <b>R2</b>                          | -1219.760779                |
| <b>Re-TS1</b>                      | -1869.474789                |
| <b>Si-TS1</b>                      | -1869.469038                |
| <b>Re-M1</b>                       | -1869.480149                |
| <b>Si-M1</b>                       | -1869.476178                |
| <b>Re-M1'</b>                      | -2134.022459                |
| <b>Si-M1'</b>                      | -2134.011214                |
| <b>Re-TS2</b>                      | -2134.006932                |
| <b>Re-TS2d</b>                     | -1869.407026                |
| <b>Re-TS2b</b>                     | -2686.679004                |
| <b>Si-TS2</b>                      | -2133.995136                |
| <b>Re-M2</b>                       | -1869.495155                |
| <b>Si-M2</b>                       | -1869.486990                |
| <b>TS3</b>                         | -1869.487106                |
| <b>M3</b>                          | -1244.167464                |
| <b>TS4R</b>                        | -2463.925530                |
| <b>TS4S</b>                        | -2463.915221                |
| <b>M4R</b>                         | -2464.043695                |
| <b>M4S</b>                         | -2464.046829                |
| <b>TS5R</b>                        | -2464.039868                |
| <b>TS5S</b>                        | -2464.031305                |
| <b>M5R</b>                         | -2464.040516                |
| <b>M5S</b>                         | -2464.035249                |
| <b>TS6R</b>                        | -2464.03526                 |
| <b>TS6S</b>                        | -2464.024055                |
| <b>PR/S</b>                        | -1411.702942                |
| <b>TS4<sub>N</sub></b>             | -2463.910575                |
| <b>TS4<sub>C</sub></b>             | -2463.902948                |
| <b>M4<sub>N</sub></b>              | -2464.001651                |
| <b>M4<sub>C</sub></b>              | -2463.959351                |
| <b>TS3'</b>                        | -1244.133284                |
| <b>R1'</b>                         | -191.895712                 |
| <b>TS4'</b>                        | -1411.613763                |

**Part II: The Gibbs free energy profiles of stereoselectivity-determining step (Step**

**4) with different method B3LYP**

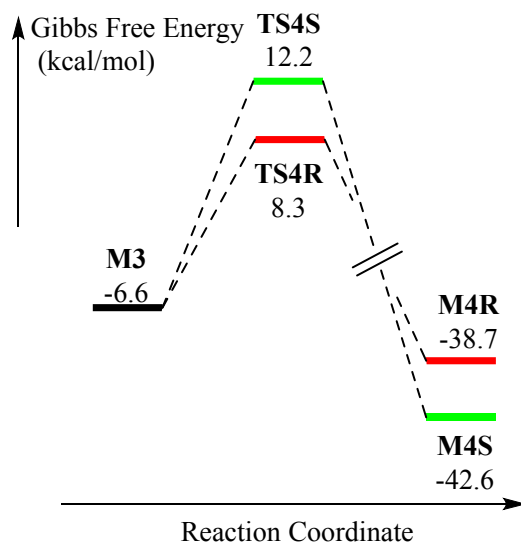

**Fig. S1** Gibbs free energy profiles at B3LYP/6-31G(d, p)//IEF-PCM<sub>1,4-dioxane</sub> level

### Part III: Cs<sub>2</sub>CO<sub>3</sub>-assisted deprotonation process of pre-NHC

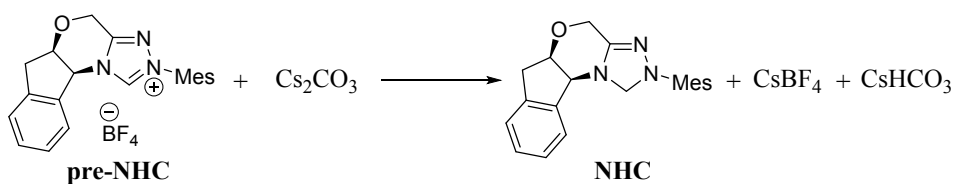

**Scheme S1** Cs<sub>2</sub>CO<sub>3</sub>-assisted deprotonation reaction of **pre-NHC**

According to Sunoj's work, the deprotonation process of **pre-NHC** for the formation of NHC has been additionally considered and investigated (Scheme S1). As shown in Fig. S2, the energy barrier for Cs<sub>2</sub>CO<sub>3</sub>-assisted deprotonation process of **pre-NHC** *via* transition state **TS** is 14.1 kcal/mol, indicating that this process can occur smoothly.

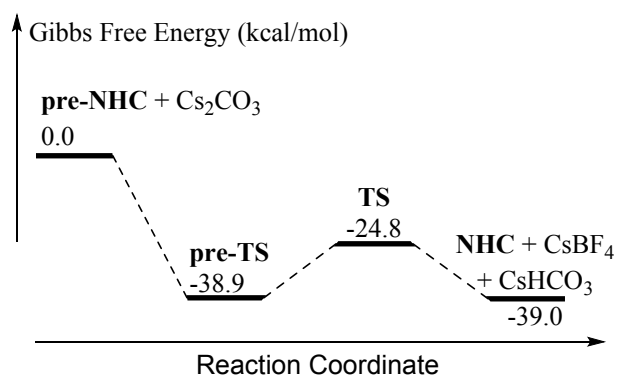

**Fig. S2** The Gibbs free energy profile of the deprotonation process of **pre-NHC**

Part IV: Optimized structures and geometrical parameters of reactants, products, and all intermediates

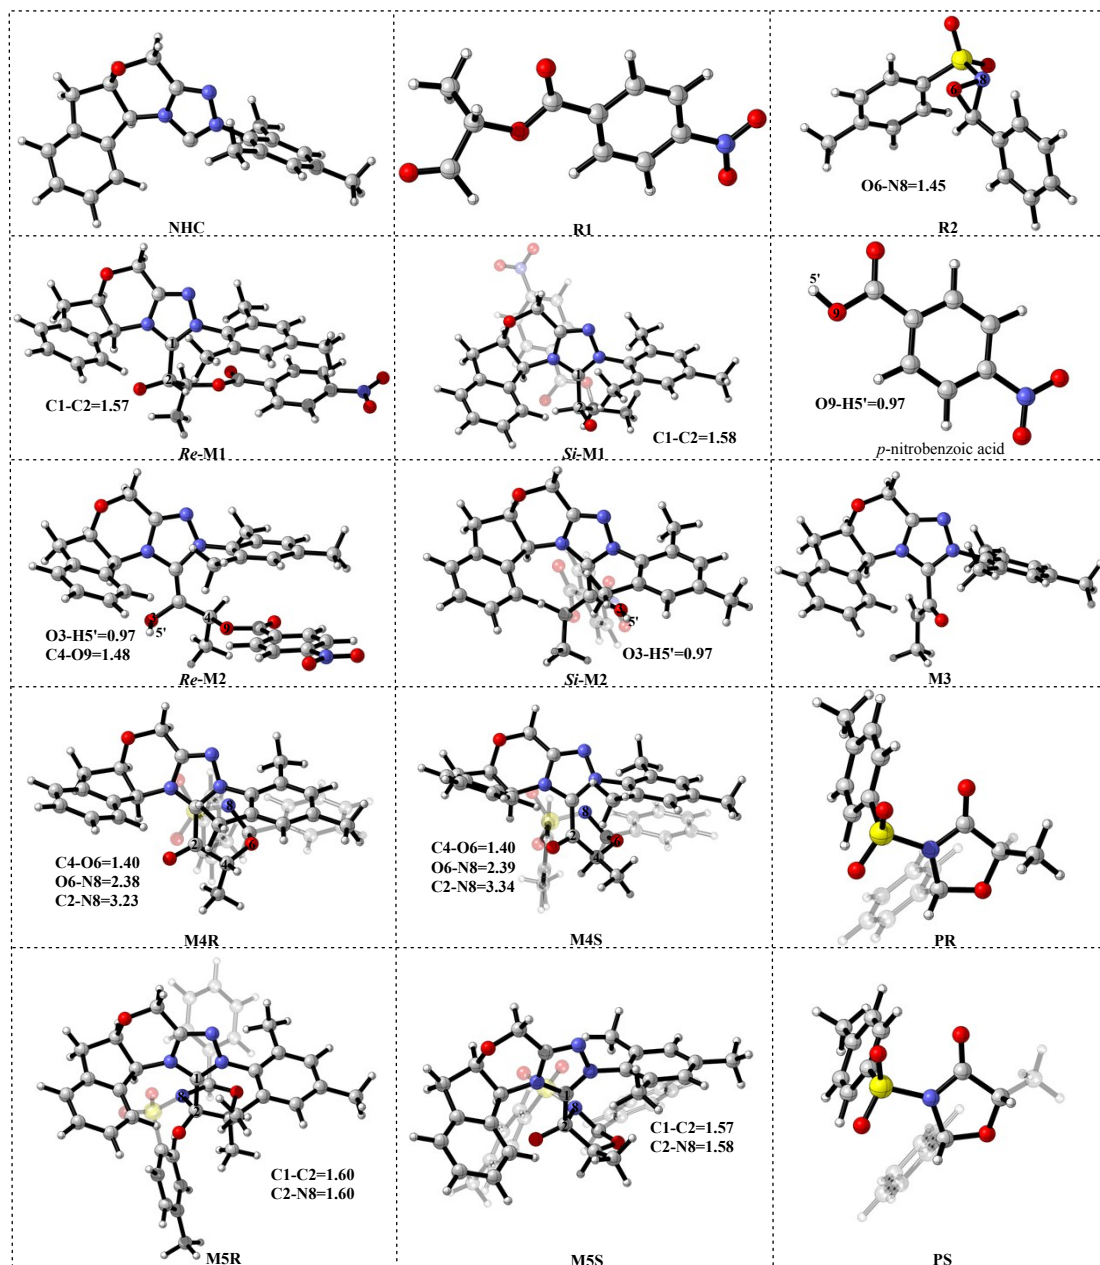

Fig. S3 Optimized structures and geometrical parameters involving with reactants, products, and all intermediates (Units in Å for distances)

## Part V: Total energy along IRC of TS4R/S

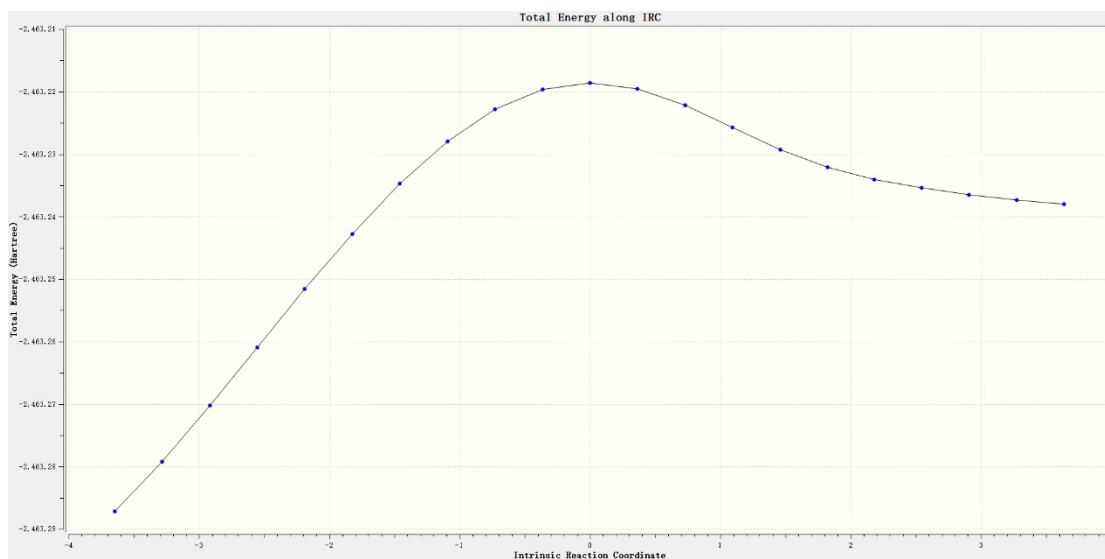

Fig. S4 Total energy along IRC of TS4R

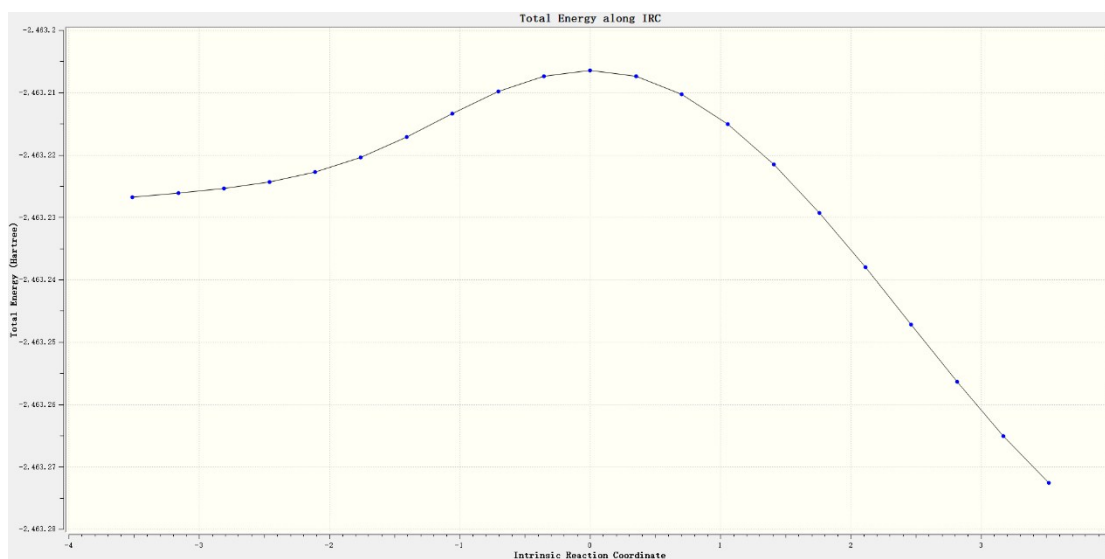

Fig. S5 Total energy along IRC of TS4S

## Part VI: The direct reaction pathway between ketene and oxaziridine

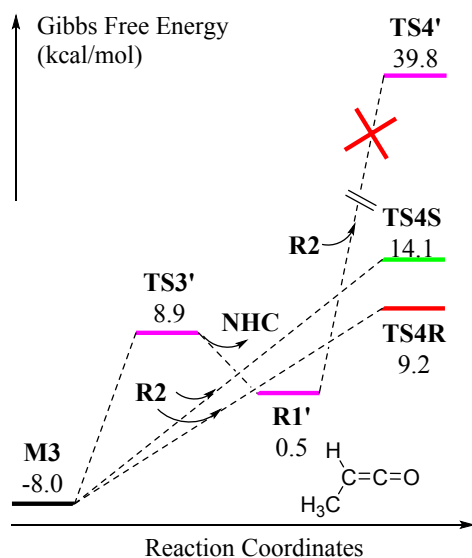

**Fig. S6** Gibbs free energy profile associated with the direct reaction between ketene and oxaziridine

In this part, we considered the direct reaction between ketene and oxaziridine. After dissociation of NHC, the ketene molecule **R1'** is formed with an energy barrier of 16.9 kcal/mol *via* the transition state **TS3'**. Then, the **C4** atom of **R1'** attacks on the **O6** atom of **R2** to construct the C–O bond. The transition state of direct reaction pathway (**TS4'**) has a high free energy of 39.8 kcal/mol. Compared with the other two similar processes (**TS4R** and **TS4S**), the direct reaction pathway is impossible to occur. We also calculated the global electrophilicity  $\omega$  and global nucleophilicity  $N$  of **R1'**. From the Table S3, the nucleophilicity index  $N$  of **R1'** decreased from 4.76 eV in **M3** to 2.91 eV, which suggests that **R1'** has a poor nucleophilicity. Thus, the NHC organocatalyst are necessary for this kind of reaction.

**Table S3.** Energies of HOMO and LUMO (Units for a.u.), electric chemical potential ( $\mu$ , eV), chemical hardness ( $\eta$ , eV), global electrophilicity ( $\omega$ , eV) and global nucleophilicity ( $N$ , eV) of Some Reactants (**SR**) ( $E_{\text{HOMO}}(\text{TCE}) = -0.38383$  a. u.)

| <b>SR</b>  | $E_{\text{HOMO}}$ | $E_{\text{LUMO}}$ | $\mu$  | $\eta$ | $\omega$ | $N$  |
|------------|-------------------|-------------------|--------|--------|----------|------|
| <b>R1</b>  | -0.34121          | -0.06864          | -5.576 | 7.417  | 2.10     | 1.16 |
| <b>M3</b>  | -0.20890          | -0.01177          | -2.682 | 6.005  | 0.60     | 4.76 |
| <b>R1'</b> | -0.27702          | 0.01870           | -3.515 | 8.047  | 0.77     | 2.91 |
| <b>R2</b>  | -0.31102          | -0.01620          | -4.452 | 8.022  | 1.23     | 1.98 |

## Part VII: Coordinates of stationary points involved in the reaction

### R1

|   |             |             |             |
|---|-------------|-------------|-------------|
| C | 4.12803700  | -1.18812200 | -0.57803200 |
| O | 5.27362700  | -1.46996300 | -0.33720600 |
| H | 3.47487800  | -1.83976700 | -1.19160200 |
| C | 3.48117800  | 0.09508400  | -0.09041600 |
| C | 4.01352500  | 0.54839100  | 1.25488000  |
| H | 3.64976200  | 0.86835300  | -0.85097600 |
| H | 3.58357600  | 1.51422000  | 1.52270000  |
| H | 3.76809800  | -0.18836500 | 2.02314500  |
| H | 5.09930800  | 0.63849800  | 1.19401200  |
| O | 2.07368900  | -0.18538800 | -0.03978400 |
| C | 1.25316700  | 0.87113700  | -0.16143200 |
| O | 1.63887900  | 2.00499800  | -0.31243100 |
| C | -0.18788200 | 0.48127100  | -0.09256800 |
| C | -0.58255000 | -0.84595300 | 0.08650900  |
| C | -1.13545100 | 1.49894800  | -0.21820400 |
| C | -1.93401700 | -1.16214000 | 0.13981300  |
| H | 0.16517100  | -1.62338800 | 0.18513400  |
| C | -2.48893700 | 1.19625600  | -0.16732100 |
| H | -0.79490800 | 2.51907000  | -0.35572300 |
| C | -2.85492000 | -0.13140400 | 0.01063000  |
| H | -2.27966700 | -2.17859200 | 0.27751100  |
| H | -3.25223200 | 1.95776000  | -0.26296800 |
| N | -4.29046300 | -0.46199000 | 0.06650700  |
| O | -5.08385200 | 0.45316900  | -0.04999800 |
| O | -4.59404900 | -1.62964900 | 0.22567500  |

### R2

|   |             |             |             |
|---|-------------|-------------|-------------|
| C | -1.07956600 | -0.03477000 | -0.20003200 |
| O | -0.67472000 | 0.61413000  | -1.38246300 |
| H | -0.32933600 | -0.70175600 | 0.22705200  |
| N | -0.81867900 | 1.38090300  | -0.16264300 |
| S | 0.75610800  | 1.88797000  | 0.39482800  |
| O | 0.56163900  | 2.12169400  | 1.81544400  |
| O | 1.13435900  | 2.95198400  | -0.51534000 |
| C | 1.86486000  | 0.52712700  | 0.16898300  |
| C | 2.20170900  | -0.25829400 | 1.26917000  |
| C | 2.38360900  | 0.27620500  | -1.09969900 |
| C | 3.07989200  | -1.31936900 | 1.08527300  |
| H | 1.79224600  | -0.02271200 | 2.24627300  |



|   |             |             |             |
|---|-------------|-------------|-------------|
| C | 3.25563100  | -0.79220800 | -1.26042500 |
| H | 2.11471000  | 0.91650100  | -1.93253500 |
| C | 3.61231900  | -1.60310300 | -0.17666200 |
| H | 3.36363100  | -1.93237300 | 1.93547900  |
| H | 3.67440400  | -0.99748100 | -2.24114300 |
| C | 4.53974100  | -2.77252700 | -0.37152200 |
| H | 5.07188900  | -3.01367600 | 0.55084100  |
| H | 3.97446900  | -3.66059300 | -0.67238500 |
| H | 5.27407800  | -2.56819900 | -1.15356900 |
| C | -2.49225000 | -0.47797400 | -0.09930400 |
| C | -3.49727400 | 0.24514600  | -0.74396400 |
| C | -2.80475200 | -1.61818000 | 0.63687900  |
| C | -4.81657700 | -0.17704900 | -0.64477400 |
| H | -3.23102900 | 1.12784600  | -1.31677500 |
| C | -4.12901400 | -2.03747300 | 0.73603800  |
| H | -2.01443700 | -2.17582500 | 1.13219700  |
| C | -5.13271100 | -1.31744100 | 0.09501100  |
| H | -5.60172500 | 0.38031000  | -1.14466000 |
| H | -4.37500500 | -2.92436500 | 1.31016800  |
| H | -6.16480300 | -1.64452000 | 0.16935800  |

**Cat**

|   |             |             |             |
|---|-------------|-------------|-------------|
| C | 0.51023300  | -1.50213700 | 0.76789000  |
| C | 1.53832900  | -2.31766900 | 1.48713600  |
| C | -0.23735000 | -0.13904300 | -0.87289800 |
| H | 1.48775800  | -3.36455000 | 1.15137600  |
| N | -0.75137300 | -1.36290500 | 1.03076000  |
| N | 0.85136300  | -0.79612500 | -0.35661400 |
| N | -1.17740600 | -0.52831600 | 0.01399100  |
| C | -2.54865600 | -0.11920800 | -0.00601200 |
| C | -2.99220600 | 0.78084200  | 0.96614400  |
| C | -3.39314800 | -0.62668800 | -0.99662700 |
| C | -4.33020300 | 1.17078300  | 0.93041300  |
| C | -4.72150900 | -0.20393500 | -0.99670300 |
| C | -5.20813700 | 0.68772500  | -0.04012000 |
| H | -4.69287200 | 1.87597600  | 1.67475300  |
| H | -5.39407100 | -0.58385800 | -1.76225200 |
| O | 2.82018600  | -1.77899500 | 1.24275500  |
| H | 1.36382800  | -2.28840100 | 2.56339200  |
| C | 3.13747600  | -1.72566800 | -0.13979700 |
| H | 3.06970600  | -2.73257400 | -0.57490400 |
| C | 2.21159000  | -0.71538400 | -0.86395900 |
| H | 2.18137200  | -0.93769200 | -1.93644100 |
| C | 4.53218600  | -1.09778900 | -0.24727700 |
| H | 5.02481100  | -1.42413500 | -1.17045600 |
| C | 4.23781600  | 0.38527900  | -0.28183800 |
| C | 2.90285800  | 0.60781400  | -0.61764300 |
| C | 5.08313100  | 1.46002000  | -0.03644300 |
| H | 6.12259300  | 1.29807300  | 0.23380600  |
| C | 4.56822400  | 2.75390800  | -0.12772000 |

|   |             |             |             |
|---|-------------|-------------|-------------|
| C | 2.38108800  | 1.88994800  | -0.71272400 |
| H | 1.33593000  | 2.03517900  | -0.97045100 |
| C | 3.23024600  | 2.96761900  | -0.46075600 |
| H | 2.84651000  | 3.98095100  | -0.52159500 |
| H | 5.21441300  | 3.60331000  | 0.07052000  |
| H | 5.15308200  | -1.40647700 | 0.59721500  |
| C | -2.87531200 | -1.58978400 | -2.03107300 |
| H | -2.10930800 | -1.11506900 | -2.65005500 |
| H | -2.41056700 | -2.45853000 | -1.55429100 |
| H | -3.68607600 | -1.93782600 | -2.67367300 |
| C | -2.04235400 | 1.31903100  | 2.00251200  |
| H | -1.74171200 | 0.53428500  | 2.70227100  |
| H | -1.12882400 | 1.69577300  | 1.53120700  |
| H | -2.50600900 | 2.13127100  | 2.56520300  |
| C | -6.65748100 | 1.10161200  | -0.04208600 |
| H | -7.06327300 | 1.11648100  | -1.05647600 |
| H | -7.26197300 | 0.40249400  | 0.54524100  |
| H | -6.78582900 | 2.09505500  | 0.39409500  |

*p*-nitrobenzoic acid

|   |             |             |             |
|---|-------------|-------------|-------------|
| C | 0.71902800  | -1.21266200 | 0.00010000  |
| C | -0.67000700 | -1.19128100 | 0.00009200  |
| C | -1.34382600 | 0.03143600  | 0.00009500  |
| C | -0.64013100 | 1.23686500  | 0.00009000  |
| C | 0.74766100  | 1.22956800  | 0.00008800  |
| C | 1.39403700  | 0.00038200  | 0.00009900  |
| H | 1.27739000  | -2.13985000 | 0.00010900  |
| H | -1.23169500 | -2.11762400 | 0.00009600  |
| H | -1.19504100 | 2.16829200  | 0.00009100  |
| H | 1.32711300  | 2.14372200  | 0.00008700  |
| N | 2.86801200  | -0.01726000 | 0.00010500  |
| O | 3.44488900  | 1.05430400  | -0.00021400 |
| O | 3.41937500  | -1.10226100 | -0.00012100 |
| C | -2.83592100 | 0.10324200  | 0.00010500  |
| O | -3.46285400 | 1.13496400  | -0.00010400 |
| O | -3.41451000 | -1.10613800 | -0.00016000 |
| H | -4.37410900 | -0.96597900 | -0.00033100 |

**Re-TS1**

|   |             |             |            |
|---|-------------|-------------|------------|
| C | -1.44373400 | -1.21577800 | 2.12142000 |
| O | -2.27686300 | -2.10829700 | 2.29489800 |
| H | -1.71152300 | -0.14504600 | 2.24286500 |
| C | 0.03104100  | -1.48440900 | 2.39179800 |
| C | 0.24324600  | -1.61718700 | 3.89233500 |
| H | 0.36017400  | -2.38875500 | 1.87572000 |
| H | 1.29430400  | -1.81479300 | 4.10940100 |
| H | -0.06525400 | -0.69895400 | 4.40122900 |
| H | -0.36516300 | -2.44472800 | 4.26251600 |

|   |             |             |             |
|---|-------------|-------------|-------------|
| O | 0.77157700  | -0.36216700 | 1.88313100  |
| C | 2.06462200  | -0.57390300 | 1.62019500  |
| O | 2.64994700  | -1.60874200 | 1.83926100  |
| C | 2.71945900  | 0.62861700  | 1.01219000  |
| C | 2.04680400  | 1.84340000  | 0.87187800  |
| C | 4.03534800  | 0.48874000  | 0.56755800  |
| C | 2.68447600  | 2.92378300  | 0.27418900  |
| H | 1.02858300  | 1.93740000  | 1.23078000  |
| C | 4.68393600  | 1.55685000  | -0.03638900 |
| H | 4.52696700  | -0.46972700 | 0.69472200  |
| C | 3.98800700  | 2.75220400  | -0.17120000 |
| H | 2.19456900  | 3.88057700  | 0.14654300  |
| H | 5.70144900  | 1.48266500  | -0.39856000 |
| N | 4.66539000  | 3.89171100  | -0.81310800 |
| O | 5.80083500  | 3.71918100  | -1.21652600 |
| O | 4.04868400  | 4.93747400  | -0.90299700 |
| C | -2.68082500 | -1.11928800 | -1.82136200 |
| C | -3.95168400 | -0.94794200 | -2.59487800 |
| C | -1.38807000 | -0.96743500 | -0.00785200 |
| H | -4.52490600 | -1.88661000 | -2.57616700 |
| N | -1.56085600 | -1.66929100 | -2.18257600 |
| N | -2.61426000 | -0.69090100 | -0.52318100 |
| N | -0.78807900 | -1.56222400 | -1.04581100 |
| C | 0.53824600  | -2.10112000 | -1.02862100 |
| C | 1.58962000  | -1.31762800 | -1.50489200 |
| C | 0.71619400  | -3.39373800 | -0.52650600 |
| C | 2.87191400  | -1.86352900 | -1.45152100 |
| C | 2.01738800  | -3.88690900 | -0.47576500 |
| C | 3.10416700  | -3.13263500 | -0.92383700 |
| H | 3.70964200  | -1.27026100 | -1.81150200 |
| H | 2.18857500  | -4.88128500 | -0.07059300 |
| O | -4.70069600 | 0.10938700  | -2.03592400 |
| H | -3.73482800 | -0.69165200 | -3.63256500 |
| C | -5.00583100 | -0.09498000 | -0.66319200 |
| H | -5.53984000 | -1.04645200 | -0.53808700 |
| C | -3.70866200 | -0.03943600 | 0.18120700  |
| H | -3.83993400 | -0.57378500 | 1.13089800  |
| C | -5.80196600 | 1.12893700  | -0.19678200 |
| H | -6.43080400 | 0.86442800  | 0.66074400  |
| C | -4.72129300 | 2.10913300  | 0.20153500  |
| C | -3.51050300 | 1.44507900  | 0.39560200  |
| C | -4.79557500 | 3.48561800  | 0.37195600  |
| H | -5.73171800 | 4.01370700  | 0.21702300  |
| C | -3.64019900 | 4.18303000  | 0.72758600  |

|   |             |             |             |
|---|-------------|-------------|-------------|
| C | -2.35360000 | 2.13117600  | 0.73845700  |
| H | -1.41291800 | 1.59761000  | 0.85788700  |
| C | -2.42873000 | 3.51438500  | 0.90398200  |
| H | -1.53805500 | 4.07619800  | 1.16724700  |
| H | -3.68181900 | 5.25975600  | 0.85701800  |
| H | -6.45147900 | 1.48915000  | -0.99807600 |
| C | -0.46783100 | -4.20553000 | -0.06679000 |
| H | -1.01748200 | -3.70987700 | 0.74275700  |
| H | -1.17401800 | -4.34965500 | -0.89085100 |
| H | -0.14475700 | -5.18668100 | 0.28537200  |
| C | 1.33720400  | 0.06378100  | -2.04609000 |
| H | 0.84428000  | 0.01695200  | -3.02232800 |
| H | 0.68278500  | 0.63069900  | -1.37641200 |
| H | 2.27634400  | 0.61262400  | -2.15446700 |
| C | 4.50723100  | -3.65997900 | -0.78195300 |
| H | 4.88184700  | -3.44981200 | 0.22587100  |
| H | 4.54382100  | -4.74216900 | -0.92797600 |
| H | 5.18550500  | -3.19111300 | -1.49857500 |

***Si-TS1***

|   |             |             |             |
|---|-------------|-------------|-------------|
| C | 1.43450700  | 1.20425600  | 1.88556300  |
| O | 2.45762200  | 1.91658300  | 1.86277200  |
| H | 0.43402200  | 1.68512000  | 1.95738900  |
| C | 1.45869300  | -0.08869500 | 2.73536300  |
| C | 2.78812100  | -0.79938500 | 2.70880100  |
| H | 1.19501500  | 0.21749600  | 3.75335200  |
| H | 2.80833300  | -1.61966500 | 3.42936500  |
| H | 2.99889300  | -1.19202900 | 1.71165900  |
| H | 3.56380800  | -0.07276700 | 2.95393200  |
| O | 0.44048100  | -1.00961000 | 2.27481900  |
| C | -0.82836300 | -0.72768500 | 2.56970400  |
| O | -1.18903600 | 0.07887700  | 3.39698200  |
| C | -1.79049900 | -1.48263200 | 1.70060000  |
| C | -1.34797400 | -2.18877500 | 0.57988000  |
| C | -3.15295800 | -1.38007500 | 1.98724300  |
| C | -2.26873900 | -2.79180500 | -0.26752800 |
| H | -0.28565000 | -2.24537000 | 0.37067600  |
| C | -4.08508100 | -1.98800600 | 1.15497300  |
| H | -3.46407400 | -0.81355900 | 2.85817100  |
| C | -3.61828300 | -2.67142600 | 0.03931000  |
| H | -1.96125500 | -3.33893100 | -1.15071400 |
| H | -5.14937400 | -1.93205500 | 1.34591700  |
| N | -4.60052800 | -3.28234300 | -0.87330800 |
| O | -5.76512800 | -3.29154300 | -0.52283600 |

|   |             |             |             |
|---|-------------|-------------|-------------|
| O | -4.18430300 | -3.73203400 | -1.92517500 |
| C | -0.32832700 | 0.00735800  | -1.65640700 |
| C | -1.58106200 | 0.03345700  | -2.47627500 |
| C | 0.95115700  | 0.46336100  | 0.10676300  |
| H | -2.18025000 | -0.86553900 | -2.26279300 |
| N | 0.78885400  | -0.60389300 | -1.90181200 |
| N | -0.27003400 | 0.66544600  | -0.45305400 |
| N | 1.56225900  | -0.30864500 | -0.79967500 |
| C | 2.94305800  | -0.70252200 | -0.81074200 |
| C | 3.91096700  | 0.29116900  | -0.96513100 |
| C | 3.25849800  | -2.06067300 | -0.69502400 |
| C | 5.24667100  | -0.11632100 | -0.98096800 |
| C | 4.60283400  | -2.41545700 | -0.72441000 |
| C | 5.60930700  | -1.45572800 | -0.86651100 |
| H | 6.01961200  | 0.63897500  | -1.09273400 |
| H | 4.87317100  | -3.46432400 | -0.62565500 |
| O | -2.30709600 | 1.20232700  | -2.17893200 |
| H | -1.33533500 | 0.04775500  | -3.53862900 |
| C | -2.63295800 | 1.31179900  | -0.80262200 |
| H | -3.19681500 | 0.42391300  | -0.47864500 |
| C | -1.35089800 | 1.51928600  | 0.04091800  |
| H | -1.55798400 | 1.24893700  | 1.08259000  |
| C | -3.38936500 | 2.63308900  | -0.63761200 |
| H | -4.02777000 | 2.59490400  | 0.25238900  |
| C | -2.27521700 | 3.64137000  | -0.46431100 |
| C | -1.09129600 | 3.00578000  | -0.08686600 |
| C | -2.30781900 | 5.02023600  | -0.62230400 |
| H | -3.22233300 | 5.52282800  | -0.92301100 |
| C | -1.13846600 | 5.74787800  | -0.39920100 |
| C | 0.07791600  | 3.71984800  | 0.14640900  |
| H | 1.00134000  | 3.23435600  | 0.46074300  |
| C | 0.03938900  | 5.10561500  | -0.01887300 |
| H | 0.93876100  | 5.68733300  | 0.15432200  |
| H | -1.14503000 | 6.82582300  | -0.52569000 |
| H | -4.02450500 | 2.81836800  | -1.50698900 |
| C | 2.18033200  | -3.08955200 | -0.48060300 |
| H | 1.65536800  | -2.88845200 | 0.46043600  |
| H | 1.44397900  | -3.06930300 | -1.28882100 |
| H | 2.60886600  | -4.09097600 | -0.41860900 |
| C | 3.53645400  | 1.74307400  | -1.09480000 |
| H | 2.71798900  | 1.87844900  | -1.80852800 |
| H | 3.21652000  | 2.13079500  | -0.12067900 |
| H | 4.39321900  | 2.32351600  | -1.44076900 |
| C | 7.05647700  | -1.87823800 | -0.91702600 |

|   |            |             |             |
|---|------------|-------------|-------------|
| H | 7.25948200 | -2.63559400 | -0.15684500 |
| H | 7.28534300 | -2.30784100 | -1.89925000 |
| H | 7.71001000 | -1.01654000 | -0.74854500 |

**Re-M1**

|   |             |             |             |
|---|-------------|-------------|-------------|
| C | -1.25047000 | 0.88565200  | -1.33084600 |
| O | -2.39175600 | 1.22140800  | -1.88600700 |
| H | -0.56210500 | 0.21621300  | -1.91349100 |
| C | -0.34796300 | 2.10877400  | -0.95565400 |
| C | -0.36969100 | 3.13230100  | -2.06920100 |
| H | -0.65128200 | 2.56170700  | -0.00381200 |
| H | 0.23493900  | 4.00301400  | -1.80427800 |
| H | 0.01717900  | 2.68356500  | -2.98899000 |
| H | -1.40512400 | 3.42375200  | -2.24286000 |
| O | 0.98734700  | 1.58019100  | -0.80707300 |
| C | 1.89990200  | 2.28246800  | -0.13766900 |
| O | 1.67431300  | 3.27539800  | 0.51518700  |
| C | 3.24886000  | 1.64515800  | -0.26486200 |
| C | 3.51544200  | 0.75257200  | -1.30459200 |
| C | 4.21429300  | 1.92946300  | 0.70093300  |
| C | 4.74662500  | 0.11662100  | -1.36926400 |
| H | 2.75057500  | 0.54544700  | -2.04346500 |
| C | 5.43965900  | 1.27620200  | 0.66618300  |
| H | 3.98250400  | 2.64464900  | 1.48319100  |
| C | 5.67075500  | 0.37350600  | -0.36537100 |
| H | 4.98789000  | -0.58219000 | -2.16040400 |
| H | 6.20372900  | 1.44547300  | 1.41431000  |
| N | 6.94763700  | -0.35773900 | -0.38725800 |
| O | 7.74513400  | -0.13156200 | 0.50417200  |
| O | 7.12664400  | -1.15676600 | -1.28945400 |
| C | -2.50612400 | -0.47148000 | 1.86836300  |
| C | -3.57311900 | -0.46045000 | 2.91780900  |
| C | -1.50051100 | 0.11712000  | 0.01099000  |
| H | -3.32983700 | 0.32080700  | 3.65435100  |
| N | -1.31767400 | -0.98309300 | 1.96518700  |
| N | -2.67236500 | 0.19240900  | 0.68229800  |
| N | -0.70192300 | -0.61047200 | 0.79976600  |
| C | 0.62847500  | -1.11319000 | 0.57758600  |
| C | 0.82624600  | -2.10836400 | -0.38510000 |
| C | 1.63575300  | -0.67907500 | 1.44202000  |
| C | 2.10859400  | -2.64811600 | -0.48706600 |
| C | 2.89063400  | -1.27257100 | 1.31614700  |
| C | 3.14727800  | -2.25216900 | 0.35867900  |
| H | 2.29005000  | -3.42350500 | -1.22765700 |
| H | 3.69159600  | -0.94848700 | 1.97665400  |
| O | -4.82673600 | -0.23422500 | 2.33338900  |
| H | -3.60311000 | -1.42351800 | 3.42962300  |
| C | -4.87278000 | 0.94256900  | 1.53323000  |
| H | -4.61061500 | 1.82044300  | 2.13891800  |
| C | -3.96957300 | 0.78522100  | 0.28517300  |
| H | -3.74459200 | 1.73261400  | -0.20501200 |
| C | -6.28405800 | 0.97306200  | 0.94465200  |
| H | -6.53717100 | 1.98733100  | 0.61578300  |
| C | -6.15699000 | 0.03222100  | -0.23183600 |
| C | -4.82118700 | -0.08669600 | -0.61630000 |

|   |             |             |             |
|---|-------------|-------------|-------------|
| C | -7.14895200 | -0.65795100 | -0.91616000 |
| H | -8.19017000 | -0.57128100 | -0.61973400 |
| C | -6.77982300 | -1.47620600 | -1.98374700 |
| C | -4.44804100 | -0.87439200 | -1.69534300 |
| H | -3.41434300 | -0.87831000 | -2.02327900 |
| C | -5.44335100 | -1.58177600 | -2.36980300 |
| H | -5.17661500 | -2.20941100 | -3.21409800 |
| H | -7.54130700 | -2.03112200 | -2.52289400 |
| H | -7.01622500 | 0.65870400  | 1.69203500  |
| C | -0.30079700 | -2.61766500 | -1.24558700 |
| H | -1.20921300 | -2.77580800 | -0.65590700 |
| H | -0.54772600 | -1.91560200 | -2.04842200 |
| H | -0.02406700 | -3.56805000 | -1.70466100 |
| C | 1.37896600  | 0.38010100  | 2.48114100  |
| H | 0.82376600  | -0.03356700 | 3.32798700  |
| H | 2.32351200  | 0.78417300  | 2.85154200  |
| H | 0.78766700  | 1.20809100  | 2.07607200  |
| C | 4.51353400  | -2.87735800 | 0.24259500  |
| H | 4.96271600  | -2.68304600 | -0.73668700 |
| H | 5.19154500  | -2.48579600 | 1.00551200  |
| H | 4.45700600  | -3.96287500 | 0.36539900  |

***Si-M1***

|   |             |             |             |
|---|-------------|-------------|-------------|
| C | 1.38060800  | 1.03660400  | 1.60479900  |
| O | 2.46768900  | 1.76935900  | 1.56026400  |
| H | 0.43949700  | 1.58177200  | 1.88061500  |
| C | 1.41564100  | -0.15202400 | 2.62855900  |
| C | 2.75400100  | -0.83755200 | 2.72584200  |
| H | 1.12466700  | 0.25622900  | 3.59896500  |
| H | 2.80136700  | -1.49103000 | 3.59961100  |
| H | 2.98279400  | -1.42006600 | 1.83306600  |
| H | 3.50103700  | -0.04553200 | 2.80619300  |
| O | 0.40143900  | -1.12277200 | 2.22914100  |
| C | -0.86752100 | -0.83187600 | 2.51736100  |
| O | -1.22764100 | -0.03017200 | 3.34987900  |
| C | -1.84004900 | -1.55460100 | 1.63069200  |
| C | -1.41749700 | -2.22449000 | 0.48015800  |
| C | -3.19939900 | -1.44740900 | 1.93187900  |
| C | -2.35326400 | -2.79267000 | -0.37601900 |
| H | -0.35919400 | -2.28688300 | 0.25277200  |
| C | -4.14612200 | -2.01746600 | 1.08974600  |
| H | -3.49644000 | -0.90644800 | 2.82365400  |
| C | -3.69822300 | -2.67165300 | -0.05088800 |
| H | -2.06081000 | -3.31739300 | -1.27765800 |
| H | -5.20773100 | -1.95707500 | 1.29381600  |
| N | -4.69585100 | -3.25396300 | -0.96617300 |
| O | -5.86093900 | -3.22870700 | -0.61827600 |
| O | -4.29063100 | -3.71761500 | -2.01611300 |
| C | -0.24037500 | 0.11076900  | -1.61576300 |
| C | -1.46538800 | 0.15267200  | -2.47661400 |
| C | 0.95554000  | 0.46954000  | 0.19678700  |
| H | -2.04971900 | -0.76694400 | -2.31795400 |
| N | 0.89458600  | -0.47595400 | -1.84441400 |
| N | -0.24228000 | 0.70712300  | -0.38309700 |
| N | 1.63075100  | -0.23955300 | -0.71090800 |
| C | 3.01038300  | -0.65829100 | -0.71207800 |

|   |             |             |             |
|---|-------------|-------------|-------------|
| C | 3.98569700  | 0.29924100  | -0.99078600 |
| C | 3.29319900  | -2.01857800 | -0.54878000 |
| C | 5.30985900  | -0.14278000 | -1.03199300 |
| C | 4.62735700  | -2.40561400 | -0.60504300 |
| C | 5.64881600  | -1.47879400 | -0.83527700 |
| H | 6.09311300  | 0.58301900  | -1.23401500 |
| H | 4.87672800  | -3.45512000 | -0.46839500 |
| O | -2.22307400 | 1.29251700  | -2.15536700 |
| H | -1.18302000 | 0.21505500  | -3.52802900 |
| C | -2.59635700 | 1.34335100  | -0.78730100 |
| H | -3.15613800 | 0.43602200  | -0.51425400 |
| C | -1.34732800 | 1.54199100  | 0.10531600  |
| H | -1.58046400 | 1.24018800  | 1.13163100  |
| C | -3.37368500 | 2.64880800  | -0.59843800 |
| H | -4.02928400 | 2.57479000  | 0.27665800  |
| C | -2.27475300 | 3.66382400  | -0.37342700 |
| C | -1.09223000 | 3.03274700  | 0.01648500  |
| C | -2.31892400 | 5.04524300  | -0.50052000 |
| H | -3.23198300 | 5.54532600  | -0.80957900 |
| C | -1.16141100 | 5.77811700  | -0.23631200 |
| C | 0.06780600  | 3.74956600  | 0.28961800  |
| H | 0.99412600  | 3.26584700  | 0.60724500  |
| C | 0.01513000  | 5.13831500  | 0.15216400  |
| H | 0.90498600  | 5.72519900  | 0.35458500  |
| H | -1.17607000 | 6.85857200  | -0.33875700 |
| H | -3.99309700 | 2.85215800  | -1.47499700 |
| C | 2.19642500  | -3.01851100 | -0.29699300 |
| H | 1.67543700  | -2.79498200 | 0.64157600  |
| H | 1.45995200  | -3.00272300 | -1.10707300 |
| H | 2.60588000  | -4.02719300 | -0.22479500 |
| C | 3.62464400  | 1.73521400  | -1.23984900 |
| H | 2.84522000  | 1.81413600  | -2.00598500 |
| H | 3.24343700  | 2.16164200  | -0.30289600 |
| H | 4.49759100  | 2.29460700  | -1.58036400 |
| C | 7.08475900  | -1.93228900 | -0.87931900 |
| H | 7.75306700  | -1.10667500 | -1.13069300 |
| H | 7.39378200  | -2.33628200 | 0.08931800  |
| H | 7.22205600  | -2.72308200 | -1.62236200 |

**Re-TS2**

|   |             |             |            |
|---|-------------|-------------|------------|
| C | -1.12714700 | -0.00202400 | 1.23527400 |
| O | -1.97480800 | 0.83831600  | 1.91105600 |
| H | -0.53170900 | 0.76951800  | 0.39404900 |
| C | 0.04315300  | -0.59056100 | 2.06051100 |
| C | 0.00437200  | -0.09885400 | 3.49381500 |
| H | 0.08692200  | -1.68368900 | 2.02974900 |
| H | 0.83618800  | -0.52818800 | 4.05756800 |
| H | 0.06196700  | 0.99111400  | 3.49219900 |
| H | -0.94497400 | -0.38349000 | 3.95001500 |
| O | 1.27043700  | -0.11206500 | 1.44478600 |
| C | 2.40534400  | -0.74037300 | 1.68107600 |
| O | 2.53929300  | -1.72517400 | 2.38163700 |
| C | 3.54448500  | -0.07031100 | 0.96830700 |



|   |             |             |             |
|---|-------------|-------------|-------------|
| C | 3.32771700  | 1.03527800  | 0.13925100  |
| C | 4.82686100  | -0.58075800 | 1.17365300  |
| C | 4.41693100  | 1.63285300  | -0.48745300 |
| H | 2.32323200  | 1.42927900  | -0.01167900 |
| C | 5.91931200  | 0.01161800  | 0.55671600  |
| H | 4.94578800  | -1.44080600 | 1.82396300  |
| C | 5.68583000  | 1.11008900  | -0.26335800 |
| H | 4.29001700  | 2.49661500  | -1.12787800 |
| H | 6.92851500  | -0.35437200 | 0.69443100  |
| N | 6.83711800  | 1.73865700  | -0.92727100 |
| O | 7.94780900  | 1.29640900  | -0.68210000 |
| O | 6.62232000  | 2.66374000  | -1.68963300 |
| C | -3.35465700 | -2.08524900 | -0.69378200 |
| C | -4.74762100 | -2.49017000 | -1.06206200 |
| C | -1.80748000 | -0.98222900 | 0.42525000  |
| H | -5.06515000 | -3.31558700 | -0.40562500 |
| N | -2.25223500 | -2.67455800 | -1.02699100 |
| N | -3.14779800 | -1.04285800 | 0.17531600  |
| N | -1.28261700 | -1.98928600 | -0.32277900 |
| C | 0.08622100  | -2.07432900 | -0.74722100 |
| C | 0.49565900  | -1.19160500 | -1.76218200 |
| C | 0.94940600  | -3.00288600 | -0.16805500 |
| C | 1.83430200  | -1.21934000 | -2.13347900 |
| C | 2.28509600  | -2.99371100 | -0.58339400 |
| C | 2.74572100  | -2.09977500 | -1.54374500 |
| H | 2.18086700  | -0.52449400 | -2.89544300 |
| H | 2.98107600  | -3.68572000 | -0.11411800 |
| O | -5.61927800 | -1.39440800 | -0.94531000 |
| H | -4.77457200 | -2.83828200 | -2.09570900 |
| C | -5.59696300 | -0.80264200 | 0.34980700  |
| H | -5.86648400 | -1.55485100 | 1.10487900  |
| C | -4.22335500 | -0.14960500 | 0.62958600  |
| H | -4.05735600 | 0.03369100  | 1.69165000  |
| C | -6.55419200 | 0.38859600  | 0.27890500  |
| H | -6.90288100 | 0.65344400  | 1.28388900  |
| C | -5.67817000 | 1.47749300  | -0.29897900 |
| C | -4.32991900 | 1.16740400  | -0.11423800 |
| C | -6.05030600 | 2.66098900  | -0.92317900 |
| H | -7.09892400 | 2.90435400  | -1.07110700 |
| C | -5.04913400 | 3.52593800  | -1.36549700 |
| C | -3.32541800 | 2.02933900  | -0.53461700 |
| H | -2.27474600 | 1.81840100  | -0.35679800 |
| C | -3.70391400 | 3.21142700  | -1.17303100 |
| H | -2.93371400 | 3.89697300  | -1.51197400 |

|   |             |             |             |
|---|-------------|-------------|-------------|
| H | -5.31962900 | 4.45287000  | -1.86241400 |
| H | -7.42529400 | 0.14230100  | -0.33353200 |
| C | 0.23097700  | 2.81926400  | 0.69100600  |
| O | 1.11754200  | 3.66178700  | 0.54068600  |
| O | -0.53251900 | 2.82723100  | 1.78413400  |
| O | -0.00839500 | 1.87495800  | -0.19036100 |
| H | -1.23914100 | 2.01043000  | 1.82402300  |
| C | 0.50844800  | -3.97558800 | 0.89301800  |
| H | 0.76838600  | -4.99716300 | 0.60145700  |
| H | 1.02539000  | -3.75103200 | 1.83180500  |
| H | -0.56843500 | -3.93187500 | 1.06421300  |
| C | -0.46267100 | -0.23509800 | -2.42006900 |
| H | -1.47179500 | -0.65126900 | -2.48373200 |
| H | -0.49629700 | 0.70554100  | -1.85964100 |
| H | -0.12325100 | -0.01139400 | -3.43416100 |
| C | 4.19637500  | -2.05492300 | -1.94455000 |
| H | 4.58821100  | -1.03907100 | -1.82726400 |
| H | 4.80102300  | -2.72538800 | -1.32976300 |
| H | 4.32469500  | -2.33944300 | -2.99382500 |

**Si-TS2**

|   |             |             |             |
|---|-------------|-------------|-------------|
| C | 1.41690300  | 0.27537600  | 1.28861200  |
| O | 2.21100300  | -0.77182500 | 1.67051500  |
| H | 2.24350100  | 1.24931700  | 1.11183800  |
| C | 0.44186800  | 0.72762300  | 2.36830800  |
| C | 1.08417900  | 0.69684100  | 3.73377200  |
| H | 0.01355600  | 1.71722400  | 2.17653400  |
| H | 0.37567000  | 1.01802000  | 4.50099300  |
| H | 1.44692600  | -0.31260500 | 3.92563300  |
| H | 1.94545400  | 1.37052500  | 3.72035500  |
| O | -0.68803000 | -0.23290700 | 2.32257000  |
| C | -1.92123400 | 0.21568500  | 2.45527400  |
| O | -2.24680100 | 1.24510400  | 3.01171100  |
| C | -2.90599900 | -0.64163400 | 1.70822300  |
| C | -2.46481500 | -1.62488800 | 0.81714200  |
| C | -4.26610700 | -0.35488000 | 1.83433700  |
| C | -3.38477900 | -2.32357900 | 0.04484000  |
| H | -1.40259100 | -1.83205900 | 0.73222900  |
| C | -5.19764800 | -1.05089700 | 1.07515400  |
| H | -4.57394600 | 0.42583800  | 2.52128900  |
| C | -4.73238400 | -2.01761900 | 0.19158700  |
| H | -3.07537200 | -3.08744100 | -0.65826400 |
| H | -6.26000400 | -0.85588300 | 1.14835800  |
| N | -5.71199800 | -2.74906000 | -0.62813100 |

|   |             |             |             |
|---|-------------|-------------|-------------|
| O | -6.89189600 | -2.49881700 | -0.45829400 |
| O | -5.28568500 | -3.56040100 | -1.42956000 |
| C | -0.59129100 | -0.12343200 | -1.74103500 |
| C | -1.78809700 | 0.18145700  | -2.58563300 |
| C | 0.73272900  | -0.00299000 | 0.02799300  |
| H | -2.61428700 | -0.48290900 | -2.28471600 |
| N | 0.25479100  | -1.08649800 | -1.90425600 |
| N | -0.34416900 | 0.58559300  | -0.59093200 |
| N | 1.07588900  | -1.00688500 | -0.80495400 |
| C | 2.24824800  | -1.84465300 | -0.79770000 |
| C | 3.40483000  | -1.34214300 | -1.38546000 |
| C | 2.15431600  | -3.12708100 | -0.26418500 |
| C | 4.50470300  | -2.19681100 | -1.45653000 |
| C | 3.27351600  | -3.94607900 | -0.36093100 |
| C | 4.45534300  | -3.49604900 | -0.95560900 |
| H | 5.42844500  | -1.82505700 | -1.89301500 |
| H | 3.23179200  | -4.94912500 | 0.05806900  |
| O | -2.15912400 | 1.53054200  | -2.43783700 |
| H | -1.55853300 | 0.00242800  | -3.63666200 |
| C | -2.40079400 | 1.87447300  | -1.08395800 |
| H | -3.18312000 | 1.22307900  | -0.66490900 |
| C | -1.09125300 | 1.79893100  | -0.26020900 |
| H | -1.36585400 | 1.77845500  | 0.79648500  |
| C | -2.74340500 | 3.36520600  | -1.06488300 |
| H | -3.32228000 | 3.60563000  | -0.16554800 |
| C | -1.38065200 | 4.02002100  | -1.02770600 |
| C | -0.41222800 | 3.11408300  | -0.58782800 |
| C | -1.02494700 | 5.32176600  | -1.35065400 |
| H | -1.77056000 | 6.02881000  | -1.70329500 |
| C | 0.31289800  | 5.70092700  | -1.22689100 |
| C | 0.92043200  | 3.47990200  | -0.45669500 |
| H | 1.69115800  | 2.79707600  | -0.10638000 |
| C | 1.27201100  | 4.79109500  | -0.78594800 |
| H | 2.30876700  | 5.09549200  | -0.68993800 |
| H | 0.60868600  | 6.71417000  | -1.48121400 |
| H | -3.34121600 | 3.63068300  | -1.94023300 |
| C | 4.47078000  | 1.44958800  | 1.05494300  |
| O | 5.53917300  | 2.04479400  | 0.90817900  |
| O | 4.45520000  | 0.12085000  | 1.17358400  |
| O | 3.31021200  | 2.06480100  | 1.08022700  |
| H | 3.48981900  | -0.29018900 | 1.42048500  |
| C | 3.45589700  | 0.07842400  | -1.87605900 |
| H | 2.71518000  | 0.25229900  | -2.66495300 |
| H | 3.25051500  | 0.77085000  | -1.05244200 |

|   |            |             |             |
|---|------------|-------------|-------------|
| H | 4.44662100 | 0.31457900  | -2.26725400 |
| C | 0.91224900 | -3.52741400 | 0.47763500  |
| H | 0.79151900 | -2.82054200 | 1.30836900  |
| H | 0.02606400 | -3.47473800 | -0.16553300 |
| H | 0.99427800 | -4.54234300 | 0.87160700  |
| C | 5.67680100 | -4.37913200 | -0.99914800 |
| H | 6.31379300 | -4.19412400 | -0.12795700 |
| H | 5.40341400 | -5.43742400 | -0.99364800 |
| H | 6.27615600 | -4.18191800 | -1.89169600 |

**Re-TS2d**

|   |             |             |             |
|---|-------------|-------------|-------------|
| C | -1.12140600 | 0.26372600  | 1.26129300  |
| O | -2.00684300 | 1.16330300  | 1.97864900  |
| H | -1.13755100 | 1.40561100  | 1.00481500  |
| C | 0.06027000  | -0.30930300 | 2.01861200  |
| C | -0.02575700 | 0.01341000  | 3.49793900  |
| H | 0.14006100  | -1.39052700 | 1.87390100  |
| H | 0.81541600  | -0.43632100 | 4.02841000  |
| H | -0.03841000 | 1.09417700  | 3.63916600  |
| H | -0.96425800 | -0.37835100 | 3.89513100  |
| O | 1.29396700  | 0.25995300  | 1.47694500  |
| C | 2.40479100  | -0.44400500 | 1.67828800  |
| O | 2.46102000  | -1.49371500 | 2.28297600  |
| C | 3.61357500  | 0.21084700  | 1.07805600  |
| C | 3.51668700  | 1.38056500  | 0.32175600  |
| C | 4.85054300  | -0.39754400 | 1.29402200  |
| C | 4.66264000  | 1.95229400  | -0.21647200 |
| H | 2.54465300  | 1.83117500  | 0.15800500  |
| C | 6.00565400  | 0.16454900  | 0.76585000  |
| H | 4.88728200  | -1.30943300 | 1.87950900  |
| C | 5.88303300  | 1.33124600  | 0.02284600  |
| H | 4.62875900  | 2.85916200  | -0.80674700 |
| H | 6.98187000  | -0.27881000 | 0.91562900  |
| N | 7.10018900  | 1.93395700  | -0.54575200 |
| O | 8.15595300  | 1.35660800  | -0.36128200 |
| O | 6.97848200  | 2.97340500  | -1.16816600 |
| C | -3.23604000 | -1.70601600 | -0.88387100 |
| C | -4.59814300 | -2.20486500 | -1.26143500 |
| C | -1.75966200 | -0.61015300 | 0.32983800  |
| H | -4.77624500 | -3.15883900 | -0.74205000 |
| N | -2.09601600 | -2.17943600 | -1.27320300 |
| N | -3.09503700 | -0.73285200 | 0.07561500  |
| N | -1.17263100 | -1.49292400 | -0.51549900 |
| C | 0.21364200  | -1.53166200 | -0.88071200 |

|   |             |             |             |
|---|-------------|-------------|-------------|
| C | 0.68838600  | -0.50145700 | -1.70939200 |
| C | 1.02797900  | -2.57174500 | -0.43779100 |
| C | 2.02879400  | -0.52579400 | -2.06840100 |
| C | 2.37217800  | -2.55053800 | -0.82707500 |
| C | 2.88762900  | -1.54064800 | -1.63096700 |
| H | 2.42141100  | 0.26930500  | -2.69868200 |
| H | 3.02996300  | -3.33834600 | -0.46730200 |
| O | -5.58050900 | -1.25813800 | -0.92749000 |
| H | -4.65004600 | -2.38105100 | -2.33687900 |
| C | -5.53043700 | -0.85136500 | 0.43465000  |
| H | -5.62537600 | -1.72488100 | 1.09390000  |
| C | -4.23749700 | -0.04523900 | 0.69464100  |
| H | -4.01917500 | 0.05056600  | 1.75860300  |
| C | -6.63731700 | 0.19188700  | 0.60071400  |
| H | -6.90730800 | 0.29262000  | 1.65811300  |
| C | -5.97354800 | 1.44721800  | 0.08004700  |
| C | -4.58522400 | 1.30563800  | 0.10343500  |
| C | -6.55308500 | 2.61843300  | -0.38864800 |
| H | -7.63289300 | 2.73180000  | -0.41307400 |
| C | -5.72183500 | 3.64106500  | -0.84636800 |
| C | -3.75345900 | 2.31998500  | -0.34499500 |
| H | -2.67610400 | 2.20371700  | -0.31439500 |
| C | -4.33535400 | 3.49109200  | -0.83009200 |
| H | -3.70308100 | 4.29466300  | -1.19346200 |
| H | -6.15764700 | 4.55979900  | -1.22595900 |
| H | -7.52932900 | -0.10185500 | 0.04273500  |
| C | -0.22363800 | 0.60598600  | -2.16145600 |
| H | -1.17511700 | 0.21452900  | -2.53481500 |
| H | -0.44604200 | 1.27198000  | -1.32000600 |
| H | 0.24376300  | 1.19236900  | -2.95397000 |
| C | 0.53026000  | -3.66296300 | 0.47102300  |
| H | -0.55769600 | -3.66654400 | 0.55189700  |
| H | 0.85065600  | -4.64039600 | 0.10214400  |
| H | 0.95972100  | -3.52645600 | 1.46959900  |
| C | 4.34129500  | -1.51148400 | -2.02044000 |
| H | 4.76097700  | -0.51489500 | -1.84933100 |
| H | 4.92352600  | -2.23237800 | -1.44272600 |
| H | 4.46639200  | -1.74388800 | -3.08270700 |

**Re-TS2b**

|   |             |             |             |
|---|-------------|-------------|-------------|
| C | -1.60697100 | -0.45171000 | -0.56552900 |
| O | -2.12726900 | -1.74696600 | -0.45507000 |
| H | -1.22482000 | -0.33827900 | 0.62392600  |
| C | -0.33168500 | -0.36016600 | -1.42249000 |

|   |             |             |             |
|---|-------------|-------------|-------------|
| C | 0.15750500  | -1.72522100 | -1.86681200 |
| H | -0.46680700 | 0.29168800  | -2.29055000 |
| H | 1.08001400  | -1.61583800 | -2.44036100 |
| H | 0.33571000  | -2.35392900 | -0.99238300 |
| H | -0.60151800 | -2.20566200 | -2.48626800 |
| O | 0.67884900  | 0.26567700  | -0.58805100 |
| C | 1.72013100  | 0.82497300  | -1.19998000 |
| O | 1.89621700  | 0.83447500  | -2.39914100 |
| C | 2.68853400  | 1.41193300  | -0.21762200 |
| C | 2.42907500  | 1.39816200  | 1.15627800  |
| C | 3.86964600  | 1.95958800  | -0.71852800 |
| C | 3.36301200  | 1.92969700  | 2.03712200  |
| H | 1.50017000  | 0.97281800  | 1.52340100  |
| C | 4.81273700  | 2.49160700  | 0.15224200  |
| H | 4.03427300  | 1.95913700  | -1.79067700 |
| C | 4.53611900  | 2.46025300  | 1.51251900  |
| H | 3.20033100  | 1.93704100  | 3.10770400  |
| H | 5.74257100  | 2.92014600  | -0.19953500 |
| N | 5.52999600  | 3.02320100  | 2.44359800  |
| O | 6.54539300  | 3.49498200  | 1.96659300  |
| O | 5.27429100  | 2.98380100  | 3.63279100  |
| C | -4.54196800 | 1.42277100  | -1.59915100 |
| C | -5.98803300 | 1.47354300  | -1.99027900 |
| C | -2.65403000 | 0.47886200  | -0.98624100 |
| H | -6.06610400 | 1.35552600  | -3.08149200 |
| N | -3.66626000 | 2.37486300  | -1.67341600 |
| N | -3.97919000 | 0.24367600  | -1.17644800 |
| N | -2.49260700 | 1.77984900  | -1.28802900 |
| C | -1.34269100 | 2.59319100  | -1.00558900 |
| C | -1.13811700 | 2.96057300  | 0.33406200  |
| C | -0.51191100 | 3.00696500  | -2.04498000 |
| C | -0.01556800 | 3.72955000  | 0.61762000  |
| C | 0.60126600  | 3.78116200  | -1.70303300 |
| C | 0.86973100  | 4.13778400  | -0.38542100 |
| H | 0.17671300  | 4.01860100  | 1.64850600  |
| H | 1.28011200  | 4.09317100  | -2.49339000 |
| O | -6.70612600 | 0.46833800  | -1.32026100 |
| H | -6.41243200 | 2.43895000  | -1.71184600 |
| C | -6.18281200 | -0.83112700 | -1.55418300 |
| H | -6.18013100 | -1.04733800 | -2.63110400 |
| C | -4.77797400 | -0.96255300 | -0.92032600 |
| H | -4.23867000 | -1.81246200 | -1.34150700 |
| C | -7.03110700 | -1.79926300 | -0.72096400 |
| H | -6.95909700 | -2.81233200 | -1.13284900 |

|   |             |             |             |
|---|-------------|-------------|-------------|
| C | -6.38871000 | -1.70768900 | 0.64604500  |
| C | -5.10004600 | -1.18495800 | 0.53912200  |
| C | -6.90330300 | -2.03489200 | 1.89306900  |
| H | -7.90625900 | -2.43949300 | 1.99121600  |
| C | -6.11437200 | -1.81473100 | 3.02432800  |
| C | -4.31748900 | -0.94166000 | 1.65582900  |
| H | -3.33268200 | -0.49056900 | 1.58776400  |
| C | -4.83812200 | -1.26385600 | 2.90936800  |
| H | -4.23458400 | -1.07609700 | 3.79146500  |
| H | -6.50728100 | -2.05947700 | 4.00612700  |
| H | -8.08048200 | -1.49615100 | -0.73798600 |
| C | -2.10148500 | 2.55170000  | 1.41610500  |
| H | -1.99746500 | 3.21211000  | 2.27892800  |
| H | -3.13714200 | 2.61289400  | 1.06739500  |
| H | -1.92225200 | 1.52885400  | 1.76834100  |
| C | -0.74570400 | 2.62957300  | -3.48351000 |
| H | -0.71587200 | 3.52057700  | -4.11556700 |
| H | 0.04830600  | 1.95455700  | -3.81998500 |
| H | -1.71063700 | 2.14246700  | -3.63278200 |
| C | 2.08894300  | 4.94534000  | -0.02844300 |
| H | 2.77300200  | 5.02982600  | -0.87525800 |
| H | 1.80950200  | 5.95485600  | 0.28843100  |
| H | 2.62574200  | 4.47639900  | 0.80231500  |
| C | -0.95697800 | -0.94388600 | 2.14346700  |
| O | -1.53503000 | -0.33088100 | 3.03779300  |
| H | -1.91272700 | -1.99015200 | 0.47860300  |
| C | 0.15248600  | -1.90091800 | 2.63740400  |
| C | 0.91475600  | -1.41178900 | 3.85394300  |
| H | -0.33678600 | -2.86052300 | 2.85034000  |
| H | 1.58959000  | -2.18078800 | 4.23591000  |
| H | 1.49711700  | -0.52088100 | 3.60037200  |
| H | 0.19207300  | -1.14047900 | 4.62545100  |
| O | 1.06262800  | -2.10719100 | 1.53245800  |
| C | 1.74212000  | -3.25851300 | 1.52118000  |
| O | 1.55691700  | -4.17685300 | 2.28562200  |
| C | 2.77460200  | -3.28927100 | 0.43637800  |
| C | 3.12562700  | -2.12480000 | -0.24626200 |
| C | 3.39532100  | -4.50289600 | 0.14027800  |
| C | 4.08874700  | -2.16259700 | -1.24477700 |
| H | 2.63122600  | -1.20021000 | 0.02075800  |
| C | 4.36002200  | -4.55960600 | -0.85712600 |
| H | 3.11321100  | -5.38898300 | 0.69779700  |
| C | 4.68212200  | -3.38599900 | -1.52802600 |
| H | 4.37549000  | -1.27638200 | -1.79798500 |

|   |            |             |             |
|---|------------|-------------|-------------|
| H | 4.86093300 | -5.48264600 | -1.11954700 |
| N | 5.70411800 | -3.44104600 | -2.58731400 |
| O | 6.20341200 | -4.52322400 | -2.83514800 |
| O | 5.98880700 | -2.40084700 | -3.15195500 |

**Re-M2**

|   |             |             |             |
|---|-------------|-------------|-------------|
| C | -1.28045400 | -0.48032700 | 1.68946100  |
| O | -2.04894100 | 0.38469100  | 2.47291100  |
| C | 0.01152800  | -0.96044700 | 2.23667200  |
| C | 0.04550600  | -1.00131900 | 3.75535100  |
| H | 0.25297900  | -1.94562500 | 1.83111800  |
| H | 1.01277600  | -1.37933000 | 4.09170600  |
| H | -0.12248300 | -0.00531300 | 4.16859700  |
| H | -0.74350700 | -1.66123800 | 4.12284500  |
| O | 1.09876400  | -0.06566100 | 1.78936900  |
| C | 2.29311300  | -0.63330100 | 1.62453100  |
| O | 2.55854100  | -1.78084700 | 1.90553000  |
| C | 3.29621800  | 0.30846900  | 1.02704100  |
| C | 2.98091400  | 1.63673300  | 0.73726400  |
| C | 4.56068300  | -0.20322900 | 0.73139700  |
| C | 3.92703700  | 2.45767000  | 0.13509200  |
| H | 1.99692300  | 2.02030800  | 0.98002400  |
| C | 5.51580300  | 0.60368200  | 0.13032300  |
| H | 4.76921800  | -1.24109000 | 0.96756900  |
| C | 5.17250300  | 1.91949600  | -0.15815600 |
| H | 3.71776200  | 3.49164900  | -0.10794700 |
| H | 6.50409100  | 0.23753100  | -0.11794800 |
| N | 6.17717100  | 2.78240600  | -0.80076200 |
| O | 7.27002500  | 2.29926200  | -1.03430000 |
| O | 5.85617500  | 3.92762300  | -1.06154400 |
| C | -3.25453800 | -1.53723300 | -1.07734200 |
| C | -4.58508800 | -1.59855700 | -1.76248100 |
| C | -1.82694100 | -0.97550600 | 0.54523600  |
| H | -5.15124600 | -2.46035000 | -1.37708600 |
| N | -2.19799500 | -2.20549300 | -1.37121700 |
| N | -3.11313800 | -0.76248400 | 0.05154100  |
| N | -1.28059000 | -1.87793900 | -0.36519700 |
| C | 0.10237800  | -2.03855900 | -0.69166800 |
| C | 0.83478000  | -0.95974000 | -1.19791100 |
| C | 0.66901800  | -3.31285800 | -0.55014300 |
| C | 2.17363600  | -1.17677800 | -1.53315500 |
| C | 2.00406300  | -3.48328900 | -0.90047400 |
| C | 2.77413200  | -2.42506100 | -1.38895800 |
| H | 2.75960300  | -0.34211800 | -1.91421400 |



|   |             |             |             |
|---|-------------|-------------|-------------|
| H | 2.45904800  | -4.46401700 | -0.78160600 |
| O | -5.29929300 | -0.40219300 | -1.54696500 |
| H | -4.44742400 | -1.72296000 | -2.83715900 |
| C | -5.48837900 | -0.12804900 | -0.16775900 |
| H | -6.01321000 | -0.96593700 | 0.31167300  |
| C | -4.12986400 | 0.17089300  | 0.50967700  |
| H | -4.22628400 | 0.07100900  | 1.59417900  |
| C | -6.23766300 | 1.20568400  | -0.08169600 |
| H | -6.76790700 | 1.27970100  | 0.87470900  |
| C | -5.12044700 | 2.22129000  | -0.16961500 |
| C | -3.89854800 | 1.62101600  | 0.13635700  |
| C | -5.17552300 | 3.56530800  | -0.51350500 |
| H | -6.12294500 | 4.03689900  | -0.75768900 |
| C | -3.98797400 | 4.29727400  | -0.56250000 |
| C | -2.71241800 | 2.33954900  | 0.07538200  |
| H | -1.75941400 | 1.85091500  | 0.26079300  |
| C | -2.76596000 | 3.68826300  | -0.27986400 |
| H | -1.84912900 | 4.26554900  | -0.34379300 |
| H | -4.01372800 | 5.34636500  | -0.83929800 |
| H | -6.97130300 | 1.28727500  | -0.88720500 |
| H | -1.71377900 | 1.28615500  | 2.37499900  |
| C | 4.21785000  | -2.64057800 | -1.76230800 |
| H | 4.72098000  | -1.69088400 | -1.95962200 |
| H | 4.75582500  | -3.15544100 | -0.96064100 |
| H | 4.30126000  | -3.25984900 | -2.66116300 |
| C | 0.22046800  | 0.40359700  | -1.35172700 |
| H | -0.81356700 | 0.34420500  | -1.70618300 |
| H | 0.21062000  | 0.91309100  | -0.38089100 |
| H | 0.79646800  | 1.00947500  | -2.05440300 |
| C | -0.16347400 | -4.44972500 | -0.02348500 |
| H | -1.01895800 | -4.63838900 | -0.67852200 |
| H | 0.43010500  | -5.36221300 | 0.05451000  |
| H | -0.56725200 | -4.21001300 | 0.96586600  |

***Si-M2***

|   |             |             |             |
|---|-------------|-------------|-------------|
| C | 0.43250800  | 0.46772500  | -0.89637900 |
| O | 0.12224400  | 1.77738300  | -1.26879900 |
| C | -0.27298100 | -0.56289000 | -1.70251700 |
| C | -0.08727500 | -0.37851900 | -3.20087500 |
| H | 0.00997300  | -1.57476700 | -1.40885500 |
| H | -0.71187600 | -1.08168000 | -3.75561200 |
| H | -0.36090300 | 0.64071800  | -3.47995500 |
| H | 0.95822200  | -0.55343000 | -3.46782400 |
| O | -1.73032800 | -0.44155200 | -1.52072500 |

|   |             |             |             |
|---|-------------|-------------|-------------|
| C | -2.24294700 | -0.83424600 | -0.36354600 |
| O | -1.62507700 | -1.39326100 | 0.51880600  |
| C | -3.70708000 | -0.52966800 | -0.25428000 |
| C | -4.38694800 | 0.16382900  | -1.25745000 |
| C | -4.37584000 | -0.96301200 | 0.89157900  |
| C | -5.74426200 | 0.42479300  | -1.11906600 |
| H | -3.84857200 | 0.49638700  | -2.13678100 |
| C | -5.73214400 | -0.71084000 | 1.04261800  |
| H | -3.81769300 | -1.49430300 | 1.65403100  |
| C | -6.38524000 | -0.02122100 | 0.02895000  |
| H | -6.30418700 | 0.95984300  | -1.87527500 |
| H | -6.28364200 | -1.03211700 | 1.91695700  |
| N | -7.82529200 | 0.24863900  | 0.17895600  |
| O | -8.37541300 | -0.16361800 | 1.18380600  |
| O | -8.38078900 | 0.86607300  | -0.71109000 |
| C | 2.22606200  | -0.44951100 | 2.06338900  |
| C | 2.63949300  | -1.45092400 | 3.09628500  |
| C | 1.16799100  | 0.28737500  | 0.23722200  |
| H | 1.86498900  | -1.50979700 | 3.87622700  |
| N | 2.40697700  | 0.82053100  | 2.11155800  |
| N | 1.50668800  | -0.85962300 | 0.96129500  |
| N | 1.75548200  | 1.30872500  | 0.98055500  |
| C | 2.12880400  | 2.60585000  | 0.52467900  |
| C | 3.02054800  | 2.74547200  | -0.54397400 |
| C | 1.60524500  | 3.71713300  | 1.19772000  |
| C | 3.35441100  | 4.03897800  | -0.95633900 |
| C | 1.98278800  | 4.98468300  | 0.76783700  |
| C | 2.85220100  | 5.16618500  | -0.31155800 |
| H | 4.04145800  | 4.16224900  | -1.79061900 |
| H | 1.57741600  | 5.85626500  | 1.27721600  |
| O | 2.83384500  | -2.71391900 | 2.50069800  |
| H | 3.57861800  | -1.14191900 | 3.55651600  |
| C | 1.66536200  | -3.16748400 | 1.83787600  |
| H | 0.82555500  | -3.20760100 | 2.54517600  |
| C | 1.34541500  | -2.26478700 | 0.62240000  |
| H | 0.29924900  | -2.43036800 | 0.35133300  |
| C | 2.00922500  | -4.51797500 | 1.20274500  |
| H | 1.09573600  | -5.10322900 | 1.04588400  |
| C | 2.63661200  | -4.11862600 | -0.11362600 |
| C | 2.28670500  | -2.80593400 | -0.43667700 |
| C | 3.46940600  | -4.84873300 | -0.95017200 |
| H | 3.75088400  | -5.86739000 | -0.69958900 |
| C | 3.95821900  | -4.24450900 | -2.10985300 |
| C | 2.78080200  | -2.19478300 | -1.58131200 |

|   |             |             |             |
|---|-------------|-------------|-------------|
| H | 2.52943300  | -1.16242700 | -1.80608500 |
| C | 3.62354600  | -2.92719000 | -2.41956900 |
| H | 4.02587900  | -2.46542500 | -3.31555400 |
| H | 4.61669100  | -4.80137800 | -2.76886500 |
| H | 2.67526200  | -5.09040300 | 1.85272100  |
| H | 0.88033200  | 2.19548900  | -1.70006300 |
| C | 3.60334900  | 1.54178200  | -1.23915300 |
| H | 3.83392800  | 0.74511000  | -0.52500300 |
| H | 2.90224400  | 1.11849700  | -1.97064200 |
| H | 4.51855900  | 1.81121500  | -1.76950300 |
| C | 0.63721900  | 3.51655400  | 2.33038400  |
| H | -0.22423600 | 2.93520800  | 1.98718500  |
| H | 1.10190700  | 2.95351700  | 3.14476800  |
| H | 0.28586400  | 4.47486100  | 2.71713700  |
| C | 3.25045100  | 6.55370600  | -0.74509600 |
| H | 2.38194600  | 7.21637700  | -0.78905800 |
| H | 3.96124900  | 6.99273500  | -0.03774700 |
| H | 3.72298900  | 6.54171800  | -1.72968200 |

**TS3**

|   |             |             |             |
|---|-------------|-------------|-------------|
| C | 1.26839100  | 0.80052600  | 1.70802600  |
| O | 1.82631100  | -0.28445600 | 2.36419100  |
| C | 0.19774200  | 1.47337900  | 2.29098100  |
| C | -0.01575700 | 1.34097000  | 3.77182400  |
| H | -0.10956300 | 2.41080100  | 1.84191400  |
| H | -0.95915400 | 1.80094200  | 4.06368300  |
| H | -0.01973600 | 0.29064400  | 4.06430800  |
| H | 0.80623800  | 1.83757800  | 4.29793600  |
| O | -1.49784200 | 0.71841800  | 1.77984400  |
| C | -1.50396400 | -0.53770100 | 1.58401800  |
| O | -0.59154000 | -1.34694100 | 1.83789300  |
| C | -2.76330200 | -1.07223000 | 0.92956100  |
| C | -3.80741000 | -0.20821300 | 0.59264200  |
| C | -2.85589000 | -2.43488800 | 0.64533700  |
| C | -4.94427100 | -0.69954700 | -0.03678100 |
| H | -3.70772800 | 0.84592700  | 0.82718900  |
| C | -3.98619800 | -2.94433200 | 0.01992600  |
| H | -2.02774700 | -3.07731700 | 0.92234800  |
| C | -5.00648300 | -2.06077300 | -0.30996800 |
| H | -5.77241500 | -0.05889900 | -0.31293500 |
| H | -4.08991800 | -3.99602700 | -0.21508500 |
| N | -6.20455000 | -2.59034300 | -0.97813200 |
| O | -6.24694900 | -3.78710400 | -1.20183600 |
| O | -7.08668600 | -1.80282300 | -1.27189700 |

|   |             |             |             |
|---|-------------|-------------|-------------|
| C | 3.16699200  | 1.25978800  | -1.29048100 |
| C | 4.43289100  | 1.03098400  | -2.05747300 |
| C | 1.79250000  | 1.10576200  | 0.43665700  |
| H | 5.15053800  | 1.82558300  | -1.80223800 |
| N | 2.23065900  | 2.10689200  | -1.55943000 |
| N | 2.95263600  | 0.60638000  | -0.10106100 |
| N | 1.36472600  | 2.00749000  | -0.48896100 |
| C | 0.06825700  | 2.60598600  | -0.59707400 |
| C | -0.98323500 | 1.82044100  | -1.07364200 |
| C | -0.08281200 | 3.94960800  | -0.24930400 |
| C | -2.23711600 | 2.42107400  | -1.17597600 |
| C | -1.35502500 | 4.50509400  | -0.36187900 |
| C | -2.44194800 | 3.75283100  | -0.81472600 |
| H | -3.07262300 | 1.83161500  | -1.54698100 |
| H | -1.50209300 | 5.54810400  | -0.09225700 |
| O | 4.96313400  | -0.23683600 | -1.75949900 |
| H | 4.23322800  | 1.07277400  | -3.12892100 |
| C | 5.17746200  | -0.43265500 | -0.36909700 |
| H | 5.85132700  | 0.34240600  | 0.02105700  |
| C | 3.82338800  | -0.46850000 | 0.37979000  |
| H | 3.97252700  | -0.32467400 | 1.45213100  |
| C | 5.70384300  | -1.86126000 | -0.21554400 |
| H | 6.24040900  | -1.96677400 | 0.73427500  |
| C | 4.43155200  | -2.67856900 | -0.22376300 |
| C | 3.33469700  | -1.87454400 | 0.09160700  |
| C | 4.25736900  | -4.02659300 | -0.50454400 |
| H | 5.10706100  | -4.65430000 | -0.75639600 |
| C | 2.96649600  | -4.55586500 | -0.47754700 |
| C | 2.04722500  | -2.39156700 | 0.11801600  |
| H | 1.18828400  | -1.77447600 | 0.36515000  |
| C | 1.87336100  | -3.74521100 | -0.17444500 |
| H | 0.87389300  | -4.16801800 | -0.16221000 |
| H | 2.81066800  | -5.60608700 | -0.70298000 |
| H | 6.39153800  | -2.10499500 | -1.02859400 |
| H | 1.10136700  | -0.94916100 | 2.36424500  |
| C | -3.81736900 | 4.36372700  | -0.88880900 |
| H | -4.33811500 | 4.25255500  | 0.06805900  |
| H | -3.76556200 | 5.43149800  | -1.11362800 |
| H | -4.42520600 | 3.87816600  | -1.65555300 |
| C | -0.74877900 | 0.39133200  | -1.47955800 |
| H | -0.00910300 | 0.33454400  | -2.28519000 |
| H | -0.36369200 | -0.20132800 | -0.64246100 |
| H | -1.67594000 | -0.07099700 | -1.82381000 |
| C | 1.09899000  | 4.74258900  | 0.24038300  |

|   |            |            |             |
|---|------------|------------|-------------|
| H | 1.88718100 | 4.77202000 | -0.51769300 |
| H | 0.80736400 | 5.76608300 | 0.48102200  |
| H | 1.53166400 | 4.28693300 | 1.13818500  |

**M3**

|   |             |             |             |
|---|-------------|-------------|-------------|
| C | -0.09381900 | -1.35560800 | 2.41994800  |
| C | -0.20565300 | -2.65323700 | 3.16059400  |
| H | 0.18581200  | -0.44997500 | 2.95461900  |
| H | 0.74987100  | -2.96947400 | 3.59720700  |
| H | -0.93165100 | -2.60512100 | 3.98098500  |
| H | -0.53200200 | -3.42812500 | 2.46301700  |
| O | -0.72508700 | -2.14101900 | 0.22588400  |
| C | -0.37478000 | -1.27215700 | 1.08649400  |
| C | 0.58835900  | 1.99040500  | -0.29782300 |
| C | 1.63121800  | 3.03992000  | -0.52845900 |
| C | -0.21046900 | 0.11591300  | 0.50739700  |
| H | 1.54591700  | 3.81379900  | 0.24884500  |
| N | -0.66646600 | 1.99074600  | -0.63832300 |
| N | 0.91043900  | 0.85813600  | 0.40389200  |
| N | -1.14390200 | 0.81330600  | -0.13311500 |
| C | -2.52357900 | 0.44404500  | -0.29828000 |
| C | -2.88494300 | -0.24774900 | -1.45511900 |
| C | -3.42169700 | 0.79079300  | 0.70823000  |
| C | -4.23036000 | -0.57348500 | -1.60028300 |
| C | -4.75717500 | 0.43946400  | 0.51700000  |
| C | -5.17665600 | -0.23377100 | -0.63046700 |
| H | -4.54527400 | -1.11860400 | -2.48671700 |
| H | -5.48301800 | 0.69243600  | 1.28571300  |
| O | 2.90591000  | 2.44301100  | -0.51342300 |
| H | 1.48658900  | 3.50463800  | -1.50427500 |
| C | 3.18938900  | 1.75319200  | 0.69605300  |
| H | 3.09379500  | 2.43882000  | 1.54874500  |
| C | 2.27033200  | 0.51375400  | 0.83003600  |
| H | 2.21018800  | 0.17824300  | 1.86959500  |
| C | 4.58546500  | 1.14609700  | 0.53163100  |
| H | 5.04016600  | 0.97365000  | 1.51366500  |
| C | 4.30323000  | -0.15835800 | -0.17965100 |
| C | 2.96268200  | -0.51869300 | -0.03546900 |
| C | 5.16936000  | -0.96738200 | -0.90266300 |
| H | 6.21231700  | -0.69177600 | -1.02764200 |
| C | 4.66831400  | -2.13430800 | -1.48039300 |
| C | 2.45062800  | -1.68039800 | -0.60019700 |
| H | 1.40339100  | -1.96149600 | -0.49003500 |

|   |             |             |             |
|---|-------------|-------------|-------------|
| C | 3.32645600  | -2.48391600 | -1.33270100 |
| H | 2.95438300  | -3.39421400 | -1.79133800 |
| H | 5.32909000  | -2.77377700 | -2.05722200 |
| H | 5.23050300  | 1.82618900  | -0.02964000 |
| C | -1.83907700 | -0.65537800 | -2.45359800 |
| H | -1.28109100 | 0.21201800  | -2.82040900 |
| H | -1.13915400 | -1.33679600 | -1.95624300 |
| H | -2.29404700 | -1.16112500 | -3.30665600 |
| C | -2.94776800 | 1.48623900  | 1.95621900  |
| H | -2.27337100 | 0.83094200  | 2.51926700  |
| H | -2.40122600 | 2.40324900  | 1.71424800  |
| H | -3.79132900 | 1.74665400  | 2.59722400  |
| C | -6.62899900 | -0.58147700 | -0.83183200 |
| H | -7.10472400 | 0.12889800  | -1.51575100 |
| H | -6.73763200 | -1.57830300 | -1.26616200 |
| H | -7.17733900 | -0.55543500 | 0.11208900  |

#### TS4R

|   |             |             |             |
|---|-------------|-------------|-------------|
| C | 1.17561700  | -0.36437700 | -1.78398600 |
| C | 1.39334900  | 0.56898400  | -2.93521000 |
| H | 2.01729700  | -0.91435300 | -1.38546100 |
| H | 2.35364500  | 1.08460600  | -2.84422300 |
| H | 1.38878900  | 0.04341700  | -3.89900500 |
| H | 0.58881000  | 1.31049800  | -2.97423900 |
| O | -1.18570500 | -0.30774100 | -2.01370200 |
| C | -0.13612000 | -0.71524600 | -1.45636900 |
| C | -1.27495500 | -1.96991100 | 1.76015300  |
| C | -2.27445000 | -1.88403900 | 2.86927900  |
| C | -0.36043200 | -1.45737100 | -0.15748400 |
| H | -1.97837900 | -1.04674600 | 3.51781600  |
| N | -0.08925600 | -2.49755600 | 1.80887200  |
| N | -1.50161300 | -1.35914300 | 0.55966400  |
| N | 0.47126700  | -2.17052400 | 0.61129300  |
| C | 1.80087000  | -2.63256500 | 0.33187500  |
| C | 2.00209000  | -3.51300600 | -0.73544900 |
| C | 2.83101700  | -2.20223500 | 1.17664500  |
| C | 3.30994100  | -3.92993800 | -0.98023200 |
| C | 4.11735200  | -2.65286400 | 0.88437900  |
| C | 4.37776200  | -3.50337400 | -0.19145700 |
| H | 3.49496900  | -4.61033700 | -1.80750500 |
| H | 4.93903500  | -2.32542800 | 1.51767300  |
| O | -3.56083100 | -1.68948700 | 2.33974900  |
| H | -2.27604500 | -2.80837600 | 3.44821700  |

|   |             |             |             |
|---|-------------|-------------|-------------|
| C | -3.63312700 | -0.52894900 | 1.52082800  |
| H | -3.31290900 | 0.35422800  | 2.08531200  |
| C | -2.79082800 | -0.72425700 | 0.23654600  |
| H | -2.57949300 | 0.23780200  | -0.22873200 |
| C | -5.06851700 | -0.47499700 | 0.99223900  |
| H | -5.32097900 | 0.54744300  | 0.68892100  |
| C | -5.01795100 | -1.40147000 | -0.20127400 |
| C | -3.70194500 | -1.56106000 | -0.63714000 |
| C | -6.05606100 | -2.05234600 | -0.85499400 |
| H | -7.08182800 | -1.93623700 | -0.51769300 |
| C | -5.75499600 | -2.87292200 | -1.94239000 |
| C | -3.39490800 | -2.36457500 | -1.72568400 |
| H | -2.37161400 | -2.45102100 | -2.07515700 |
| C | -4.43743000 | -3.02891200 | -2.37244800 |
| H | -4.22061800 | -3.66825000 | -3.22214300 |
| H | -6.55393000 | -3.39710700 | -2.45734100 |
| H | -5.77232900 | -0.78709600 | 1.76734700  |
| C | 1.79467400  | 2.03134500  | -0.00009300 |
| O | 1.22252100  | 0.76480300  | 0.08323300  |
| H | 1.21257100  | 2.75327900  | -0.58333400 |
| N | 1.48847200  | 1.91235600  | 1.40002500  |
| S | -0.08496900 | 2.24921000  | 1.90346100  |
| O | 0.06655600  | 3.11165500  | 3.07029900  |
| O | -0.80735000 | 0.98237700  | 2.06681300  |
| C | -0.91609400 | 3.18286000  | 0.63708300  |
| C | -1.29238200 | 2.56049900  | -0.55365700 |
| C | -1.18008800 | 4.52832600  | 0.86400900  |
| C | -1.95083700 | 3.30462000  | -1.52251100 |
| H | -1.05632700 | 1.51814600  | -0.74234900 |
| C | -1.85085000 | 5.25539200  | -0.11654000 |
| H | -0.87521900 | 4.98382300  | 1.80002800  |
| C | -2.24303700 | 4.65925200  | -1.31721200 |
| H | -2.24069300 | 2.81797400  | -2.45017900 |
| H | -2.07492500 | 6.30378200  | 0.05692900  |
| C | -2.94964700 | 5.45253900  | -2.38444700 |
| H | -2.27816400 | 5.64586400  | -3.22686400 |
| H | -3.81125400 | 4.90325500  | -2.77274100 |
| H | -3.29618300 | 6.41405000  | -2.00076000 |
| C | 3.25876700  | 2.08401600  | -0.31820300 |
| C | 4.06469700  | 0.97221000  | -0.07773300 |
| C | 3.81262000  | 3.24161500  | -0.86009000 |
| C | 5.42216900  | 1.02189700  | -0.37252100 |
| H | 3.61251300  | 0.07169800  | 0.32320900  |
| C | 5.17452400  | 3.29412500  | -1.14704400 |

|   |             |             |             |
|---|-------------|-------------|-------------|
| H | 3.17832000  | 4.10173500  | -1.05923300 |
| C | 5.97986500  | 2.18436900  | -0.90373900 |
| H | 6.04470600  | 0.15080300  | -0.19011300 |
| H | 5.60417700  | 4.19791600  | -1.56661900 |
| H | 7.03986100  | 2.22294400  | -1.13385000 |
| C | 2.57389800  | -1.29048000 | 2.34709700  |
| H | 1.89086500  | -0.47926800 | 2.07995200  |
| H | 2.12641800  | -1.84785300 | 3.17452000  |
| H | 3.51166100  | -0.84955100 | 2.69182200  |
| C | 0.87088000  | -3.98180100 | -1.61166800 |
| H | -0.02608100 | -4.20984300 | -1.02842700 |
| H | 0.60689300  | -3.21312800 | -2.34646300 |
| H | 1.16307200  | -4.88158100 | -2.15543300 |
| C | 5.78798800  | -3.93462800 | -0.49861900 |
| H | 6.31753200  | -3.14984800 | -1.04867500 |
| H | 6.34876700  | -4.12933700 | 0.41876300  |
| H | 5.80238900  | -4.83842600 | -1.11110200 |

#### TS4S

|   |             |             |             |
|---|-------------|-------------|-------------|
| C | -0.94736100 | -0.79819800 | 1.46746800  |
| C | -0.47642800 | -0.81433100 | 2.89072800  |
| H | -1.04356400 | -1.73470000 | 0.92960300  |
| H | -1.31091800 | -0.98219200 | 3.58397300  |
| H | 0.25610600  | -1.60771200 | 3.05811200  |
| H | -0.02867900 | 0.14891000  | 3.15273800  |
| O | -1.71672600 | 1.46020800  | 1.51433800  |
| C | -1.57946100 | 0.34037300  | 0.97474000  |
| C | -3.44482300 | -0.31410900 | -2.11932500 |
| C | -4.46831300 | -1.11164700 | -2.86675100 |
| C | -2.17578000 | 0.21533600  | -0.41774500 |
| H | -3.96043100 | -1.88183700 | -3.46539200 |
| N | -2.71133200 | 0.67356200  | -2.54100000 |
| N | -3.15004800 | -0.62631700 | -0.81806900 |
| N | -1.93511100 | 0.99610900  | -1.46787300 |
| C | -0.89873700 | 1.99042000  | -1.57286200 |
| C | -1.15397600 | 3.27936300  | -1.10010900 |
| C | 0.31047000  | 1.59504000  | -2.14898500 |
| C | -0.09326700 | 4.18176900  | -1.14250000 |
| C | 1.33976200  | 2.53455700  | -2.15443700 |
| C | 1.16309600  | 3.81638500  | -1.63226400 |
| H | -0.24950000 | 5.19133100  | -0.76960000 |
| H | 2.30645800  | 2.24469300  | -2.55677800 |
| O | -5.36914500 | -1.69004800 | -1.95226300 |
| H | -5.03423800 | -0.46164500 | -3.53474200 |



|   |             |             |             |
|---|-------------|-------------|-------------|
| C | -4.73012100 | -2.51372100 | -0.98868000 |
| H | -4.14223500 | -3.29360500 | -1.49016500 |
| C | -3.86362700 | -1.64658500 | -0.04076200 |
| H | -3.11177300 | -2.26563900 | 0.45683100  |
| C | -5.83172300 | -3.05054400 | -0.07123900 |
| H | -5.50611400 | -3.98304100 | 0.40329900  |
| C | -5.99276500 | -1.94509000 | 0.94743100  |
| C | -4.87388900 | -1.11049500 | 0.95259500  |
| C | -7.05134100 | -1.69829900 | 1.81096600  |
| H | -7.92849400 | -2.33824400 | 1.80903900  |
| C | -6.97364900 | -0.60294900 | 2.67132000  |
| C | -4.78353300 | -0.01828100 | 1.80623600  |
| H | -3.91625400 | 0.63747900  | 1.81037400  |
| C | -5.85486900 | 0.22932600  | 2.66581100  |
| H | -5.81366700 | 1.08072700  | 3.33687500  |
| H | -7.79624600 | -0.39193100 | 3.34709400  |
| H | -6.73642300 | -3.25801700 | -0.64720300 |
| C | 1.92053900  | -0.29309400 | 0.99625500  |
| O | 0.77199400  | -0.45879700 | 0.22555500  |
| H | 2.10772800  | -1.13509900 | 1.67386900  |
| N | 2.45771400  | -0.41443800 | -0.32864300 |
| S | 2.81955700  | -2.00603200 | -0.73992800 |
| O | 2.64584700  | -2.12481100 | -2.18399400 |
| O | 2.16854600  | -2.97518500 | 0.14324000  |
| C | 4.56059900  | -2.03693100 | -0.38398700 |
| C | 5.45213000  | -1.50175400 | -1.31135400 |
| C | 5.00089500  | -2.55673800 | 0.82889500  |
| C | 6.80683200  | -1.49113600 | -1.00984900 |
| H | 5.07889300  | -1.11248600 | -2.25284300 |
| C | 6.36266500  | -2.53530300 | 1.11385500  |
| H | 4.28424600  | -2.98334400 | 1.52316000  |
| C | 7.28048900  | -2.00525500 | 0.20347900  |
| H | 7.51301800  | -1.07939700 | -1.72547300 |
| H | 6.72023900  | -2.94158200 | 2.05566600  |
| C | 8.75674500  | -2.00962400 | 0.50203400  |
| H | 9.22646600  | -1.07878700 | 0.17462500  |
| H | 8.94554700  | -2.13519900 | 1.57011400  |
| H | 9.25330400  | -2.83110700 | -0.02434600 |
| C | 2.15817700  | 1.04013300  | 1.64031900  |
| C | 1.39211400  | 2.15067500  | 1.29654100  |
| C | 3.18803600  | 1.16153100  | 2.57352100  |
| C | 1.66604700  | 3.38410800  | 1.88204900  |
| H | 0.57640400  | 2.04295300  | 0.59167800  |
| C | 3.46441600  | 2.39630900  | 3.15187300  |

|   |             |             |             |
|---|-------------|-------------|-------------|
| H | 3.77828500  | 0.28735700  | 2.83984300  |
| C | 2.70197200  | 3.51094600  | 2.80481800  |
| H | 1.05985700  | 4.24486400  | 1.61373300  |
| H | 4.26801600  | 2.48930300  | 3.87547300  |
| H | 2.91024100  | 4.47389400  | 3.26100000  |
| C | 2.32024700  | 4.77483200  | -1.54708200 |
| H | 2.82958400  | 4.64449100  | -0.58525400 |
| H | 3.05083100  | 4.59297300  | -2.33832400 |
| H | 1.98539400  | 5.81293500  | -1.61104200 |
| C | 0.47212200  | 0.23603900  | -2.76985500 |
| H | 0.11759200  | -0.55309100 | -2.10225800 |
| H | -0.09786800 | 0.18111700  | -3.70367100 |
| H | 1.52062100  | 0.02543300  | -2.97710000 |
| C | -2.50848200 | 3.66378400  | -0.57235700 |
| H | -3.29335400 | 3.41071000  | -1.29233600 |
| H | -2.70378300 | 3.12437000  | 0.35845100  |
| H | -2.55212500 | 4.73723000  | -0.38081700 |

**M4R**

|   |             |             |             |
|---|-------------|-------------|-------------|
| C | 0.17578100  | 1.17029400  | 2.14974700  |
| C | 0.56337800  | 0.35222400  | 3.37905200  |
| H | -0.07409600 | 2.19192000  | 2.48070000  |
| H | 1.51589900  | 0.72576400  | 3.76159600  |
| H | -0.20114400 | 0.46872600  | 4.14814300  |
| H | 0.64125300  | -0.70715200 | 3.13038500  |
| O | -2.02463000 | 0.21330300  | 2.27288000  |
| C | -1.14400100 | 0.65330200  | 1.57410000  |
| C | -1.92619100 | 0.07119800  | -1.91201900 |
| C | -2.36640900 | -0.91843400 | -2.94370500 |
| C | -1.40611300 | 0.73296100  | 0.08486600  |
| H | -1.49341700 | -1.54035400 | -3.18548900 |
| N | -1.31772400 | 1.21330000  | -2.07951600 |
| N | -2.06254000 | -0.22663000 | -0.58853600 |
| N | -1.00809100 | 1.62115500  | -0.82440200 |
| C | -0.39015800 | 2.89589000  | -0.59385600 |
| C | -1.02428200 | 3.78946800  | 0.27436600  |
| C | 0.82258300  | 3.18097200  | -1.23823300 |
| C | -0.36478800 | 4.98962000  | 0.55088400  |
| C | 1.42732200  | 4.39339700  | -0.92555500 |
| C | 0.86346700  | 5.30015200  | -0.02471400 |
| H | -0.83623900 | 5.70134900  | 1.22391600  |
| H | 2.38415100  | 4.62478100  | -1.38803700 |
| O | -3.42617800 | -1.69122300 | -2.43514400 |
| H | -2.71701200 | -0.40373800 | -3.83919000 |

|   |             |             |             |
|---|-------------|-------------|-------------|
| C | -3.08358500 | -2.38917600 | -1.23897400 |
| H | -2.21164700 | -3.02644200 | -1.40197400 |
| C | -2.84609700 | -1.37293600 | -0.09250500 |
| H | -2.26781500 | -1.82675800 | 0.71929100  |
| C | -4.35480800 | -3.11712700 | -0.80068600 |
| H | -4.10103600 | -3.94636300 | -0.13085200 |
| C | -5.12189900 | -2.03791700 | -0.07369800 |
| C | -4.26262800 | -1.00845300 | 0.31662700  |
| C | -6.48033300 | -1.96229900 | 0.20158300  |
| H | -7.15042100 | -2.75991300 | -0.10527100 |
| C | -6.97330100 | -0.83391700 | 0.85668000  |
| C | -4.74810600 | 0.11851200  | 0.96483400  |
| H | -4.08042200 | 0.91720100  | 1.26968900  |
| C | -6.11578700 | 0.20014000  | 1.22856000  |
| H | -6.51428500 | 1.07713800  | 1.72819500  |
| H | -8.03481400 | -0.75477100 | 1.06866600  |
| H | -4.88134700 | -3.52368000 | -1.66734200 |
| C | 1.92463600  | 0.24991600  | 0.68971800  |
| O | 1.18474900  | 1.37053900  | 1.20234200  |
| H | 2.18532100  | -0.40207500 | 1.54055900  |
| N | 1.21388000  | -0.43887600 | -0.35076600 |
| S | 0.66850400  | -1.87656700 | -0.02317500 |
| O | -0.06411400 | -2.36629600 | -1.20837500 |
| O | -0.08120800 | -1.94232200 | 1.26186600  |
| C | 2.04477200  | -2.99997800 | 0.20273300  |
| C | 2.50451400  | -3.30019300 | 1.48170400  |
| C | 2.69761300  | -3.49916000 | -0.92107600 |
| C | 3.63165500  | -4.10176300 | 1.63054500  |
| H | 1.96603800  | -2.92219000 | 2.34518800  |
| C | 3.82052900  | -4.30236100 | -0.75688600 |
| H | 2.31461600  | -3.26280400 | -1.90920500 |
| C | 4.30460000  | -4.61271400 | 0.51750800  |
| H | 3.99343500  | -4.34012000 | 2.62744300  |
| H | 4.32967800  | -4.69901100 | -1.63108000 |
| C | 5.51022800  | -5.49879300 | 0.69566200  |
| H | 6.20733500  | -5.07354800 | 1.42261000  |
| H | 5.21499400  | -6.48639800 | 1.06412900  |
| H | 6.04193700  | -5.63867300 | -0.24781600 |
| C | 3.21547500  | 0.85374300  | 0.14256500  |
| C | 3.64546400  | 2.12940300  | 0.50880500  |
| C | 3.98734000  | 0.10659600  | -0.74860200 |
| C | 4.82003700  | 2.65731300  | -0.02574700 |
| H | 3.04156200  | 2.71718100  | 1.19012200  |
| C | 5.16644000  | 0.62802600  | -1.27131700 |

|   |             |             |             |
|---|-------------|-------------|-------------|
| H | 3.64037300  | -0.87827700 | -1.04538800 |
| C | 5.58419400  | 1.90995700  | -0.91722200 |
| H | 5.13565700  | 3.65788500  | 0.25588900  |
| H | 5.75584400  | 0.03642100  | -1.96521700 |
| H | 6.49881300  | 2.32138800  | -1.33295800 |
| C | -2.38470600 | 3.53063100  | 0.87890500  |
| H | -3.03065100 | 2.96730500  | 0.19928800  |
| H | -2.33018500 | 2.97771200  | 1.82379800  |
| H | -2.87542700 | 4.48139600  | 1.09418700  |
| C | 1.46524900  | 2.24217700  | -2.22205300 |
| H | 1.00532200  | 2.35853400  | -3.20840100 |
| H | 2.53159700  | 2.46822100  | -2.30060900 |
| H | 1.35135400  | 1.19969300  | -1.91243600 |
| C | 1.57680500  | 6.58593800  | 0.30200200  |
| H | 0.97011500  | 7.22651800  | 0.94497200  |
| H | 2.52022200  | 6.38198100  | 0.81802700  |
| H | 1.81741200  | 7.14190800  | -0.60833900 |

**M4S**

|   |             |             |             |
|---|-------------|-------------|-------------|
| C | 0.26507300  | 0.92043500  | 2.16228800  |
| C | 0.18402800  | 2.05520600  | 3.18138300  |
| H | 0.51446500  | -0.02324300 | 2.66768800  |
| H | -0.63405300 | 1.88144600  | 3.88325500  |
| H | 1.12564700  | 2.10404800  | 3.73097000  |
| H | 0.03666400  | 3.00876400  | 2.66655700  |
| O | -2.05404800 | 0.33388800  | 2.29441300  |
| C | -1.12560200 | 0.64421500  | 1.58748800  |
| C | -1.88887700 | 0.03320000  | -1.90264400 |
| C | -2.33298100 | -0.96263400 | -2.92685600 |
| C | -1.36902300 | 0.70545600  | 0.09215300  |
| H | -1.46382100 | -1.59460100 | -3.15604200 |
| N | -1.25873700 | 1.16207000  | -2.07716800 |
| N | -2.03944100 | -0.24784500 | -0.57662500 |
| N | -0.94776400 | 1.57548100  | -0.82398000 |
| C | -0.32586100 | 2.84992500  | -0.60271000 |
| C | -0.96559000 | 3.75889400  | 0.24523200  |
| C | 0.88784500  | 3.12657300  | -1.24909800 |
| C | -0.30297000 | 4.96043400  | 0.51135700  |
| C | 1.49707000  | 4.33861600  | -0.94407300 |
| C | 0.93183200  | 5.25792300  | -0.05679000 |
| H | -0.77727300 | 5.68192100  | 1.17212600  |
| H | 2.45762800  | 4.56026900  | -1.40359400 |
| O | -3.40286300 | -1.72077500 | -2.41753300 |
| H | -2.67344200 | -0.45392600 | -3.82966500 |

|   |             |             |             |
|---|-------------|-------------|-------------|
| C | -3.07905300 | -2.40491300 | -1.20816400 |
| H | -2.21000000 | -3.05082700 | -1.35169400 |
| C | -2.84799300 | -1.37322800 | -0.07399000 |
| H | -2.28737400 | -1.82169200 | 0.75303600  |
| C | -4.36197600 | -3.11459000 | -0.77550600 |
| H | -4.12517200 | -3.93268500 | -0.08598800 |
| C | -5.13021400 | -2.01498000 | -0.08092300 |
| C | -4.26763600 | -0.98619900 | 0.30504200  |
| C | -6.49216100 | -1.92260300 | 0.17013400  |
| H | -7.16409100 | -2.71970200 | -0.13404700 |
| C | -6.98567200 | -0.77846400 | 0.79694400  |
| C | -4.75341200 | 0.15594000  | 0.92634300  |
| H | -4.08409900 | 0.95279700  | 1.23203400  |
| C | -6.12475500 | 0.25376700  | 1.16543400  |
| H | -6.52324800 | 1.14283800  | 1.64321600  |
| H | -8.04984500 | -0.68585600 | 0.98927100  |
| H | -4.87908700 | -3.53348000 | -1.64193300 |
| C | 1.98820100  | 0.16810500  | 0.64085000  |
| O | 1.22161000  | 1.25068400  | 1.20132100  |
| H | 2.27229300  | -0.48605300 | 1.48699000  |
| N | 1.28637400  | -0.53128800 | -0.39563900 |
| S | 0.67504700  | -1.93252400 | -0.02732900 |
| O | -0.04704200 | -2.44035500 | -1.21111600 |
| O | -0.10899800 | -1.92528200 | 1.24036500  |
| C | 2.00352200  | -3.09266000 | 0.27721300  |
| C | 2.71551100  | -3.59611800 | -0.81144900 |
| C | 2.36631000  | -3.42532300 | 1.57637500  |
| C | 3.79685600  | -4.43635900 | -0.58760000 |
| H | 2.40688900  | -3.33243700 | -1.81873500 |
| C | 3.45650300  | -4.26853200 | 1.78595000  |
| H | 1.78476100  | -3.03831100 | 2.40676600  |
| C | 4.18426200  | -4.78332200 | 0.71352500  |
| H | 4.35230600  | -4.83598000 | -1.43223900 |
| H | 3.74222000  | -4.53288100 | 2.80044400  |
| C | 5.34877900  | -5.71273400 | 0.93768900  |
| H | 6.20575800  | -5.42540400 | 0.32261700  |
| H | 5.66186600  | -5.71037200 | 1.98388100  |
| H | 5.08303500  | -6.74020900 | 0.66920600  |
| C | 3.25462100  | 0.80806600  | 0.08541300  |
| C | 3.67053200  | 2.07964100  | 0.48053700  |
| C | 4.01925700  | 0.09912300  | -0.84212800 |
| C | 4.82236400  | 2.64386200  | -0.06600600 |
| H | 3.07129000  | 2.63670800  | 1.19179200  |
| C | 5.17594700  | 0.65660900  | -1.37707200 |

|             |             |             |             |
|-------------|-------------|-------------|-------------|
| H           | 3.67939400  | -0.88233400 | -1.15750600 |
| C           | 5.57778700  | 1.93631700  | -0.99686100 |
| H           | 5.12724200  | 3.64165700  | 0.23662900  |
| H           | 5.75930700  | 0.09636000  | -2.10140500 |
| H           | 6.47416600  | 2.37665500  | -1.42256300 |
| C           | 1.63925600  | 6.55322600  | 0.24434500  |
| H           | 1.14660800  | 7.09807900  | 1.05198100  |
| H           | 2.67698000  | 6.36868900  | 0.53645100  |
| H           | 1.65883600  | 7.19895000  | -0.63885900 |
| C           | 1.52164200  | 2.18498600  | -2.23590600 |
| H           | 1.06327000  | 2.31456900  | -3.22145300 |
| H           | 2.59065900  | 2.39910500  | -2.31292000 |
| H           | 1.39445100  | 1.14147800  | -1.93600000 |
| C           | -2.33362900 | 3.51821900  | 0.83937400  |
| H           | -2.96776900 | 2.92675300  | 0.17277500  |
| H           | -2.28866000 | 3.00305100  | 1.80560900  |
| H           | -2.82962900 | 4.47556400  | 1.00913500  |
| <b>TS5R</b> |             |             |             |
| C           | 0.86455900  | 1.11405800  | -1.46817100 |
| C           | 0.25513200  | 2.30326200  | -2.18961400 |
| H           | 1.50655300  | 0.56966900  | -2.16984000 |
| H           | 1.05262400  | 2.89063800  | -2.64951400 |
| H           | -0.42758200 | 1.94888500  | -2.96486900 |
| H           | -0.31274600 | 2.94483400  | -1.51458200 |
| O           | -1.28895100 | -0.03188500 | -1.50909600 |
| C           | -0.19977600 | 0.13341200  | -0.96213100 |
| C           | 0.45934600  | -2.81177300 | 1.12557300  |
| C           | -0.02651400 | -3.69087900 | 2.23885300  |
| C           | 0.36724800  | -1.10366500 | -0.22852900 |
| H           | 0.29976100  | -3.23809000 | 3.18768300  |
| N           | 1.67043700  | -2.68856000 | 0.66737800  |
| N           | -0.37868600 | -1.89234500 | 0.56257900  |
| N           | 1.59583900  | -1.62582400 | -0.19026100 |
| C           | 2.71244200  | -1.37701000 | -1.06542900 |
| C           | 2.54832200  | -1.67106200 | -2.42397900 |
| C           | 3.91920300  | -0.93838400 | -0.51679300 |
| C           | 3.63867800  | -1.44615900 | -3.26203000 |
| C           | 4.97688300  | -0.73290800 | -1.40068600 |
| C           | 4.85367200  | -0.96720300 | -2.77035800 |
| H           | 3.53738700  | -1.66083400 | -4.32271800 |
| H           | 5.92545300  | -0.38092900 | -1.00310600 |
| O           | -1.42196100 | -3.82834000 | 2.19143000  |
| H           | 0.41588800  | -4.68470200 | 2.15712300  |
| C           | -2.13084400 | -2.59048400 | 2.13113100  |

|   |             |             |             |
|---|-------------|-------------|-------------|
| H | -1.89887900 | -1.96812200 | 3.00470300  |
| C | -1.82433000 | -1.87458200 | 0.80101600  |
| H | -2.13905100 | -0.82917200 | 0.84847900  |
| C | -3.60520800 | -2.96692500 | 1.98248300  |
| H | -4.23376500 | -2.11059800 | 2.25123800  |
| C | -3.70353100 | -3.27683200 | 0.50445400  |
| C | -2.65313000 | -2.66946300 | -0.18837800 |
| C | -4.63953600 | -4.04332900 | -0.17494600 |
| H | -5.45598400 | -4.52164900 | 0.35792500  |
| C | -4.50204100 | -4.20478500 | -1.55465200 |
| C | -2.51354000 | -2.81838500 | -1.55954000 |
| H | -1.70960000 | -2.31889900 | -2.08889400 |
| C | -3.44784500 | -3.60194600 | -2.23891900 |
| H | -3.35460600 | -3.73867100 | -3.31155000 |
| H | -5.21994900 | -4.80974200 | -2.09942200 |
| H | -3.86084200 | -3.80786400 | 2.63088500  |
| C | 0.95271700  | 1.93888100  | 0.72315300  |
| O | 1.71017400  | 1.44452200  | -0.38875900 |
| H | 0.73235700  | 3.00758600  | 0.54852200  |
| N | -0.24962600 | 1.13996300  | 0.79041200  |
| S | -1.54136200 | 1.90275600  | 1.40151400  |
| O | -1.12135300 | 2.74279400  | 2.52701100  |
| O | -2.59018600 | 0.90099500  | 1.63156100  |
| C | -2.18792500 | 3.01708900  | 0.17011200  |
| C | -2.97680900 | 2.51025800  | -0.86112900 |
| C | -1.82881600 | 4.36056000  | 0.20866900  |
| C | -3.39348900 | 3.36731700  | -1.87062800 |
| H | -3.23887000 | 1.45794200  | -0.87464800 |
| C | -2.25163400 | 5.20401100  | -0.81599900 |
| H | -1.23477800 | 4.72982900  | 1.03833500  |
| C | -3.03373200 | 4.72066600  | -1.86667700 |
| H | -4.00721300 | 2.98254400  | -2.68073400 |
| H | -1.97356800 | 6.25418800  | -0.79619100 |
| C | -3.51324100 | 5.63990000  | -2.95984800 |
| H | -3.48922700 | 5.14192200  | -3.93242700 |
| H | -4.54663600 | 5.95130800  | -2.77561400 |
| H | -2.89912700 | 6.54116000  | -3.01760700 |
| C | 1.86904600  | 1.82102100  | 1.92490900  |
| C | 3.07553600  | 2.52271200  | 1.91024500  |
| C | 1.57192500  | 0.98558100  | 2.99793900  |
| C | 3.98731700  | 2.37539700  | 2.94940800  |
| H | 3.30396300  | 3.17067100  | 1.06809100  |
| C | 2.48639000  | 0.83573100  | 4.03959100  |
| H | 0.62466100  | 0.45607500  | 3.00343100  |

|   |            |             |             |
|---|------------|-------------|-------------|
| C | 3.69650600 | 1.52339500  | 4.01460200  |
| H | 4.92546100 | 2.92139900  | 2.92967400  |
| H | 2.25094300 | 0.18292300  | 4.87458200  |
| H | 4.40781000 | 1.40506100  | 4.82597700  |
| C | 1.24905400 | -2.20467100 | -2.97403900 |
| H | 0.84624900 | -3.00366400 | -2.34280200 |
| H | 0.48136900 | -1.42455300 | -3.04871400 |
| H | 1.40415200 | -2.61086900 | -3.97457000 |
| C | 4.08655300 | -0.73817800 | 0.96200700  |
| H | 4.22973400 | -1.70287300 | 1.45868200  |
| H | 4.95344300 | -0.10842200 | 1.16857100  |
| H | 3.20712000 | -0.26321600 | 1.39918500  |
| C | 6.00722600 | -0.69748200 | -3.70043300 |
| H | 5.93372600 | -1.29913500 | -4.60891900 |
| H | 6.02056600 | 0.35583000  | -3.99863700 |
| H | 6.96258900 | -0.91476900 | -3.21731300 |

**TS5S**

|   |             |             |             |
|---|-------------|-------------|-------------|
| C | -0.54369200 | -0.16078800 | 2.14544300  |
| C | -0.23460600 | -1.24965000 | 3.15544400  |
| H | -0.49128900 | 0.81821400  | 2.64989200  |
| H | -0.46875400 | -2.23335800 | 2.74843800  |
| H | 0.81721100  | -1.20556700 | 3.45155600  |
| H | -0.84900400 | -1.09894200 | 4.04531700  |
| O | 1.43907000  | 0.82500900  | 1.33593100  |
| C | 0.52154300  | 0.04523300  | 1.05099600  |
| C | 2.05116700  | -1.74201200 | -1.74159800 |
| C | 3.05587400  | -1.73410700 | -2.85264500 |
| C | 0.93680300  | -0.97871000 | -0.02320900 |
| H | 2.58797900  | -1.27022700 | -3.73382300 |
| N | 1.04340900  | -2.55190700 | -1.61082800 |
| N | 2.04943800  | -0.78252400 | -0.76994100 |
| N | 0.36045300  | -2.06922600 | -0.53662400 |
| C | -0.76060300 | -2.85350500 | -0.08758500 |
| C | -0.50590900 | -3.82955500 | 0.88230700  |
| C | -1.97359700 | -2.74628600 | -0.76785300 |
| C | -1.57119100 | -4.63620400 | 1.27285100  |
| C | -3.00162300 | -3.59296600 | -0.34951400 |
| C | -2.82925800 | -4.52038600 | 0.67587000  |
| H | -1.40962200 | -5.38751900 | 2.04176500  |
| H | -3.96763900 | -3.51104400 | -0.84193900 |
| O | 4.20779100  | -1.03797900 | -2.46162900 |
| H | 3.33903500  | -2.75751000 | -3.10304100 |
| C | 3.91398600  | 0.27815500  | -2.00604900 |



|   |             |             |             |
|---|-------------|-------------|-------------|
| H | 3.37598200  | 0.83951700  | -2.78024300 |
| C | 3.12408700  | 0.22937000  | -0.68164100 |
| H | 2.64105600  | 1.18637600  | -0.49467300 |
| C | 5.25381400  | 0.88509700  | -1.58521300 |
| H | 5.18634600  | 1.97869300  | -1.57767800 |
| C | 5.43292800  | 0.33829600  | -0.18606300 |
| C | 4.20333400  | -0.06985900 | 0.33583300  |
| C | 6.59243500  | 0.20904200  | 0.56572000  |
| H | 7.55086500  | 0.52325900  | 0.16295700  |
| C | 6.50753200  | -0.34739200 | 1.84250600  |
| C | 4.11094200  | -0.61533600 | 1.60734300  |
| H | 3.14929800  | -0.91043500 | 2.01450100  |
| C | 5.27888800  | -0.75906600 | 2.35704000  |
| H | 5.22878800  | -1.19056800 | 3.35154500  |
| H | 7.40690200  | -0.46449700 | 2.43882300  |
| H | 6.04375600  | 0.59207400  | -2.28060700 |
| C | -2.11162100 | 0.68356300  | 0.71320800  |
| O | -1.82974100 | -0.35487500 | 1.63106700  |
| H | -2.17487700 | 1.64095900  | 1.26673800  |
| N | -0.94376300 | 0.69091800  | -0.16272500 |
| S | -0.59985800 | 1.88494800  | -1.17816200 |
| O | -1.52125100 | 1.94643500  | -2.31733700 |
| O | 0.82587100  | 1.74003700  | -1.50913400 |
| C | -0.81285600 | 3.42077400  | -0.28823100 |
| C | -1.67014700 | 4.39121700  | -0.79103000 |
| C | -0.12140700 | 3.61814400  | 0.90773000  |
| C | -1.84294100 | 5.57848100  | -0.08297500 |
| H | -2.18663200 | 4.20965000  | -1.72798900 |
| C | -0.30842500 | 4.80656600  | 1.60076700  |
| H | 0.55028900  | 2.84662600  | 1.28047500  |
| C | -1.16972000 | 5.80120100  | 1.11833300  |
| H | -2.51336000 | 6.34063800  | -0.46995300 |
| H | 0.22037900  | 4.97081500  | 2.53609000  |
| C | -1.34994600 | 7.08462500  | 1.88631700  |
| H | -0.42830600 | 7.67467300  | 1.87742200  |
| H | -2.14635800 | 7.69573800  | 1.45710100  |
| H | -1.59772700 | 6.88307900  | 2.93220900  |
| C | -3.47210400 | 0.40204500  | 0.09559100  |
| C | -4.20204300 | -0.72720700 | 0.46806600  |
| C | -4.04331800 | 1.31410500  | -0.79461800 |
| C | -5.45693100 | -0.97113900 | -0.08727800 |
| H | -3.77848600 | -1.41887300 | 1.18567100  |
| C | -5.29454900 | 1.06921900  | -1.34998000 |
| H | -3.50475500 | 2.21330800  | -1.06928700 |

|   |             |             |             |
|---|-------------|-------------|-------------|
| C | -6.00303500 | -0.08063900 | -1.00672900 |
| H | -6.00947700 | -1.85963400 | 0.20590900  |
| H | -5.71773200 | 1.78097700  | -2.05160500 |
| H | -6.97909200 | -0.27098700 | -1.44223100 |
| C | -3.96276200 | -5.42125400 | 1.09301700  |
| H | -3.97636500 | -6.33130900 | 0.48457200  |
| H | -3.86492600 | -5.72262000 | 2.13832100  |
| H | -4.92735600 | -4.92434000 | 0.96533600  |
| C | -2.15614700 | -1.82687800 | -1.94369400 |
| H | -1.67852600 | -2.26257200 | -2.82825600 |
| H | -3.21967400 | -1.69000600 | -2.15274000 |
| H | -1.71457000 | -0.84451100 | -1.76330900 |
| C | 0.88468200  | -4.05692100 | 1.41913400  |
| H | 1.53018200  | -4.45747500 | 0.63043500  |
| H | 1.35159000  | -3.13861900 | 1.78593300  |
| H | 0.86443200  | -4.77465100 | 2.24092800  |

**M5R**

|   |             |             |             |
|---|-------------|-------------|-------------|
| C | -0.26486000 | -1.86736200 | -0.77834400 |
| C | 0.77471600  | -2.88921900 | -1.19898300 |
| H | -1.07594100 | -1.88097300 | -1.50465900 |
| H | 0.27912100  | -3.82354400 | -1.47213100 |
| H | 1.32630200  | -2.50208300 | -2.05921500 |
| H | 1.49175900  | -3.10248100 | -0.40406000 |
| O | 1.17765500  | 0.00459300  | -1.45609200 |
| C | 0.31956900  | -0.43649500 | -0.62367600 |
| C | -1.95236200 | 2.40840900  | 0.21475200  |
| C | -2.12415400 | 3.72087100  | 0.91567700  |
| C | -0.88544300 | 0.59367800  | -0.40571500 |
| H | -2.39767100 | 3.50844900  | 1.96120500  |
| N | -2.88671200 | 1.60051300  | -0.18269900 |
| N | -0.71392600 | 1.85185600  | 0.05705600  |
| N | -2.20782300 | 0.48052300  | -0.57768300 |
| C | -2.97212900 | -0.53260500 | -1.25521500 |
| C | -2.80677500 | -0.64971500 | -2.64030500 |
| C | -3.88455600 | -1.28807700 | -0.52148000 |
| C | -3.57525400 | -1.60998100 | -3.29173500 |
| C | -4.62999900 | -2.23486200 | -1.22483400 |
| C | -4.48449600 | -2.41436100 | -2.59946600 |
| H | -3.46430800 | -1.73061800 | -4.36644500 |
| H | -5.34395000 | -2.84649100 | -0.67868200 |
| O | -0.94776400 | 4.48057800  | 0.84333600  |
| H | -2.93008000 | 4.29268400  | 0.45360400  |
| C | 0.21040400  | 3.77878300  | 1.28418500  |

|   |             |             |             |
|---|-------------|-------------|-------------|
| H | 0.08422400  | 3.45608100  | 2.32740400  |
| C | 0.51735100  | 2.60396400  | 0.32831100  |
| H | 1.24038900  | 1.91794100  | 0.77300000  |
| C | 1.38436200  | 4.72868700  | 1.05004400  |
| H | 2.24432400  | 4.41752300  | 1.65365000  |
| C | 1.65449900  | 4.53615400  | -0.42531000 |
| C | 1.13382300  | 3.31587300  | -0.86179900 |
| C | 2.30557500  | 5.38010700  | -1.31340600 |
| H | 2.70768500  | 6.33175300  | -0.97838900 |
| C | 2.41799100  | 4.98985100  | -2.64832700 |
| C | 1.25183700  | 2.91253600  | -2.18354300 |
| H | 0.88537700  | 1.93817500  | -2.48867600 |
| C | 1.89484400  | 3.77084000  | -3.07730300 |
| H | 1.99453100  | 3.48096000  | -4.11854900 |
| H | 2.91482900  | 5.64276500  | -3.35923500 |
| H | 1.11532900  | 5.75136400  | 1.32415000  |
| C | 0.00988000  | -1.66329000 | 1.51195100  |
| O | -0.85967700 | -2.13733700 | 0.48454400  |
| H | 0.66739700  | -2.47833900 | 1.85184200  |
| N | 0.79356500  | -0.58969600 | 0.89957400  |
| S | 2.38638600  | -0.48044200 | 1.36113000  |
| O | 2.38649800  | -0.86008000 | 2.77218000  |
| O | 2.88030600  | 0.83234200  | 0.96416300  |
| C | 3.36876300  | -1.68341100 | 0.50163300  |
| C | 3.78033000  | -1.42320900 | -0.80383300 |
| C | 3.68110100  | -2.87615800 | 1.14576100  |
| C | 4.50841900  | -2.39783600 | -1.47218100 |
| H | 3.48881800  | -0.49292700 | -1.27899200 |
| C | 4.40682600  | -3.84110100 | 0.45331400  |
| H | 3.36441500  | -3.03386900 | 2.17140600  |
| C | 4.82639500  | -3.61673800 | -0.85977300 |
| H | 4.83308800  | -2.21599100 | -2.49311400 |
| H | 4.65460400  | -4.77913900 | 0.94177700  |
| C | 5.63390900  | -4.65066900 | -1.59968400 |
| H | 5.33573600  | -4.70478700 | -2.64965300 |
| H | 6.69858500  | -4.39681800 | -1.57344600 |
| H | 5.51543300  | -5.64063100 | -1.15438700 |
| C | -0.87086900 | -1.20288100 | 2.65388600  |
| C | -1.67842000 | -2.14709900 | 3.29016400  |
| C | -0.95664700 | 0.13624000  | 3.02670300  |
| C | -2.58236200 | -1.75181200 | 4.26971100  |
| H | -1.61161300 | -3.19095500 | 2.99526100  |
| C | -1.86558400 | 0.53409300  | 4.00581500  |
| H | -0.29630400 | 0.85737300  | 2.55475000  |

|   |             |             |             |
|---|-------------|-------------|-------------|
| C | -2.68488400 | -0.40663600 | 4.62296300  |
| H | -3.21108500 | -2.49095400 | 4.75609600  |
| H | -1.92521600 | 1.57930800  | 4.29498400  |
| H | -3.39185000 | -0.09613200 | 5.38567600  |
| C | -1.81177200 | 0.20407400  | -3.38361900 |
| H | -1.95977900 | 1.26632700  | -3.16036800 |
| H | -0.77735400 | -0.04435700 | -3.11098300 |
| H | -1.92332500 | 0.06400900  | -4.45990400 |
| C | -4.08308800 | -1.06878400 | 0.95226800  |
| H | -4.79999400 | -0.25890400 | 1.12108800  |
| H | -4.46935600 | -1.97426800 | 1.42440600  |
| H | -3.14719800 | -0.79820600 | 1.44422100  |
| C | -5.27688000 | -3.47017900 | -3.32539200 |
| H | -5.48640100 | -3.16940700 | -4.35449000 |
| H | -4.71884200 | -4.41135100 | -3.36281300 |
| H | -6.22608400 | -3.66762600 | -2.82250700 |

**M5S**

|   |             |             |             |
|---|-------------|-------------|-------------|
| C | -0.39737100 | -0.32554100 | 2.21263500  |
| C | -0.10470900 | -1.63097200 | 2.91151600  |
| H | -0.05299400 | 0.51475900  | 2.83347200  |
| H | -0.64172400 | -2.44778700 | 2.43149600  |
| H | 0.96949200  | -1.83878100 | 2.90365000  |
| H | -0.43118500 | -1.57593000 | 3.95220700  |
| O | 1.37597300  | 0.77208000  | 1.08686900  |
| C | 0.35137900  | 0.01686600  | 0.87366700  |
| C | 2.01307900  | -2.23666300 | -1.53697800 |
| C | 3.12563300  | -2.47680500 | -2.51044500 |
| C | 0.79265200  | -1.16262200 | -0.06802800 |
| H | 2.77472000  | -2.18149900 | -3.51074100 |
| N | 0.91845400  | -2.92938500 | -1.44906300 |
| N | 1.99573600  | -1.15964100 | -0.69685300 |
| N | 0.16786600  | -2.24990300 | -0.53707800 |
| C | -1.12118600 | -2.82360900 | -0.24178400 |
| C | -1.14554300 | -3.93461000 | 0.61470900  |
| C | -2.23348700 | -2.41074900 | -0.97335400 |
| C | -2.37677600 | -4.53284800 | 0.85643700  |
| C | -3.44226200 | -3.06391600 | -0.71052500 |
| C | -3.54139400 | -4.09495200 | 0.21738900  |
| H | -2.42467900 | -5.38030000 | 1.53601700  |
| H | -4.32717300 | -2.74585900 | -1.25760600 |
| O | 4.26755100  | -1.75715900 | -2.13799600 |
| H | 3.37905700  | -3.53808700 | -2.52959700 |
| C | 3.99115200  | -0.37529000 | -1.93632700 |

|   |             |             |             |
|---|-------------|-------------|-------------|
| H | 3.53651900  | 0.05595500  | -2.83812600 |
| C | 3.10560000  | -0.17717400 | -0.68417700 |
| H | 2.63668200  | 0.80595500  | -0.67970400 |
| C | 5.32252600  | 0.25526200  | -1.52882900 |
| H | 5.29810100  | 1.33678400  | -1.70293900 |
| C | 5.38492600  | -0.05755700 | -0.05143400 |
| C | 4.10623700  | -0.32059400 | 0.44412000  |
| C | 6.48930400  | -0.09505900 | 0.78908400  |
| H | 7.48462000  | 0.10583500  | 0.40342900  |
| C | 6.29874800  | -0.40911500 | 2.13469000  |
| C | 3.90780700  | -0.60943000 | 1.78636600  |
| H | 2.90238300  | -0.74536000 | 2.16655600  |
| C | 5.01923500  | -0.66310700 | 2.62778500  |
| H | 4.88459000  | -0.89493900 | 3.67956300  |
| H | 7.15264000  | -0.45292500 | 2.80347100  |
| H | 6.14303200  | -0.17100700 | -2.11065700 |
| C | -1.93647500 | 0.89605600  | 1.12906200  |
| O | -1.78804200 | -0.19526600 | 1.99392000  |
| H | -1.67779300 | 1.83432900  | 1.65479200  |
| N | -0.89557500 | 0.61792900  | 0.10333500  |
| S | -0.62870500 | 1.65913900  | -1.14872900 |
| O | -1.82918000 | 1.73300800  | -1.97489800 |
| O | 0.60912400  | 1.19862400  | -1.78167300 |
| C | -0.40990500 | 3.30745400  | -0.49051000 |
| C | -1.12185700 | 4.33963400  | -1.09741700 |
| C | 0.46406800  | 3.55196600  | 0.56799500  |
| C | -0.94965100 | 5.64078700  | -0.63640000 |
| H | -1.80079700 | 4.11505600  | -1.91273000 |
| C | 0.61485000  | 4.85998800  | 1.01387400  |
| H | 0.99409900  | 2.71594200  | 1.02387500  |
| C | -0.08279300 | 5.91907500  | 0.42275000  |
| H | -1.49686800 | 6.45218400  | -1.10791000 |
| H | 1.29031500  | 5.06523000  | 1.84027600  |
| C | 0.08360300  | 7.32398300  | 0.93978800  |
| H | -0.45151400 | 7.45260200  | 1.88612200  |
| H | 1.13630100  | 7.55081300  | 1.12675700  |
| H | -0.30711800 | 8.05705000  | 0.23122600  |
| C | -3.35860600 | 0.97184800  | 0.63377400  |
| C | -4.16076000 | -0.16778900 | 0.63436100  |
| C | -3.88946600 | 2.18967700  | 0.21052500  |
| C | -5.47271200 | -0.09741400 | 0.17339600  |
| H | -3.75003400 | -1.10045500 | 1.00303200  |
| C | -5.19936000 | 2.25965500  | -0.25132700 |
| H | -3.27180200 | 3.08434000  | 0.23364200  |

|   |             |             |             |
|---|-------------|-------------|-------------|
| C | -5.99226300 | 1.11392600  | -0.27636500 |
| H | -6.09140200 | -0.99038900 | 0.17458700  |
| H | -5.60287900 | 3.20882500  | -0.58881300 |
| H | -7.01520400 | 1.16904900  | -0.63529900 |
| C | -4.86915400 | -4.73584900 | 0.52473800  |
| H | -5.58702000 | -4.56641000 | -0.28063200 |
| H | -4.76389400 | -5.81331800 | 0.67424900  |
| H | -5.29200200 | -4.31655400 | 1.44366500  |
| C | -2.17570800 | -1.36444900 | -2.04857100 |
| H | -2.63175900 | -1.75979200 | -2.96066800 |
| H | -2.72650300 | -0.46885200 | -1.75242300 |
| H | -1.15439600 | -1.05734500 | -2.28021200 |
| C | 0.11904100  | -4.53026500 | 1.18025800  |
| H | 0.89081300  | -3.78114000 | 1.36815200  |
| H | -0.08756200 | -5.05309800 | 2.11656900  |
| H | 0.53302900  | -5.25318200 | 0.47006200  |

**TS6R**

|   |             |             |             |
|---|-------------|-------------|-------------|
| C | -0.59010156 | -0.11421320 | 0.00000000  |
| C | 0.59800844  | -0.96883720 | -0.41662700 |
| H | -1.39300156 | -0.20286120 | -0.73097100 |
| H | 0.27154044  | -1.99890020 | -0.57487800 |
| H | 1.01938944  | -0.57393220 | -1.34421500 |
| H | 1.38685244  | -0.96585820 | 0.34081900  |
| O | 0.49911644  | 1.99856680  | -0.60526000 |
| C | -0.16504356 | 1.34767880  | 0.19877500  |
| C | -3.43133056 | 3.61663180  | 1.32730700  |
| C | -3.84568456 | 4.83459580  | 2.09213500  |
| C | -1.98323656 | 2.17945780  | 0.44896200  |
| H | -3.92556956 | 4.57108080  | 3.15841000  |
| N | -4.16661956 | 2.62127080  | 0.93852600  |
| N | -2.11178956 | 3.39733180  | 1.03151600  |
| N | -3.25187056 | 1.75058680  | 0.39494300  |
| C | -3.74016056 | 0.57447680  | -0.26047900 |
| C | -3.57600356 | 0.47330080  | -1.64856000 |
| C | -4.37944856 | -0.40280020 | 0.50134100  |
| C | -4.05873556 | -0.67586720 | -2.26851000 |
| C | -4.84829356 | -1.53364220 | -0.16970400 |
| C | -4.69569456 | -1.68839220 | -1.54526700 |
| H | -3.93941456 | -0.78250020 | -3.34433000 |
| H | -5.34209356 | -2.31419720 | 0.40380700  |
| O | -2.91289056 | 5.86928780  | 1.89690300  |
| H | -4.81828856 | 5.18754480  | 1.74678400  |
| C | -1.58063156 | 5.49372080  | 2.22485900  |

|   |             |             |             |
|---|-------------|-------------|-------------|
| H | -1.52838056 | 5.17643180  | 3.27639100  |
| C | -1.07443056 | 4.40168980  | 1.25284900  |
| H | -0.19421056 | 3.90053880  | 1.66441200  |
| C | -0.70414056 | 6.70267380  | 1.88920300  |
| H | 0.23699844  | 6.65019880  | 2.44817500  |
| C | -0.46338756 | 6.52991280  | 0.40624000  |
| C | -0.69036256 | 5.20606880  | 0.02872500  |
| C | -0.07053556 | 7.46865680  | -0.53772700 |
| H | 0.10364744  | 8.50241880  | -0.25367500 |
| C | 0.08407544  | 7.06180680  | -1.86344800 |
| C | -0.52809856 | 4.78824380  | -1.28336700 |
| H | -0.66964856 | 3.74528980  | -1.55152800 |
| C | -0.14251356 | 5.73600780  | -2.23236300 |
| H | -0.01266356 | 5.43681380  | -3.26752300 |
| H | 0.38352444  | 7.78505180  | -2.61570900 |
| H | -1.21417156 | 7.63210080  | 2.15321400  |
| C | -0.35044556 | 0.13155780  | 2.27937500  |
| O | -1.12679256 | -0.48453120 | 1.26061100  |
| H | 0.48283044  | -0.52845820 | 2.57146100  |
| N | 0.17463244  | 1.36029180  | 1.66457500  |
| S | 1.67143044  | 1.88964780  | 2.19523400  |
| O | 1.69857344  | 1.52670880  | 3.60718800  |
| O | 1.82024244  | 3.27729080  | 1.78604400  |
| C | 2.91682544  | 0.93420580  | 1.37123800  |
| C | 3.31981744  | 1.30130380  | 0.08870600  |
| C | 3.42997244  | -0.19297520 | 2.00717900  |
| C | 4.24641944  | 0.50248380  | -0.56735900 |
| H | 2.88868544  | 2.18014180  | -0.37626000 |
| C | 4.35538644  | -0.97939820 | 1.32849000  |
| H | 3.11512944  | -0.43453320 | 3.01715500  |
| C | 4.77203744  | -0.64570620 | 0.03683900  |
| H | 4.56847344  | 0.77197080  | -1.56921600 |
| H | 4.76496444  | -1.86228020 | 1.81066900  |
| C | 5.79557844  | -1.48442620 | -0.68182800 |
| H | 5.82275944  | -2.50212120 | -0.28687200 |
| H | 5.58392544  | -1.53253120 | -1.75254300 |
| H | 6.79474744  | -1.05316620 | -0.56230200 |
| C | -1.25968856 | 0.36595780  | 3.46241800  |
| C | -1.78659356 | -0.74998820 | 4.11340100  |
| C | -1.63920256 | 1.64302780  | 3.86684200  |
| C | -2.70752756 | -0.59128220 | 5.14317600  |
| H | -1.48868156 | -1.74478920 | 3.79297900  |
| C | -2.56421156 | 1.80251880  | 4.89692700  |
| H | -1.19799056 | 2.50618980  | 3.37823500  |

|             |             |             |             |
|-------------|-------------|-------------|-------------|
| C           | -3.10532756 | 0.68748080  | 5.53101400  |
| H           | -3.11921556 | -1.46359620 | 5.64072900  |
| H           | -2.85426556 | 2.80049580  | 5.21201400  |
| H           | -3.82716056 | 0.81348180  | 6.33146200  |
| C           | -2.87427056 | 1.54811880  | -2.44027900 |
| H           | -3.23499456 | 2.54457280  | -2.16708300 |
| H           | -1.79145956 | 1.53731080  | -2.26206000 |
| H           | -3.04315056 | 1.40077880  | -3.50843000 |
| C           | -4.56715956 | -0.23769320 | 1.98387300  |
| H           | -5.43814356 | 0.39123780  | 2.19232200  |
| H           | -4.71780656 | -1.20865820 | 2.46021800  |
| H           | -3.69726356 | 0.24096280  | 2.43942500  |
| C           | -5.20754956 | -2.91620920 | -2.25327100 |
| H           | -5.95516256 | -2.64742720 | -3.00563400 |
| H           | -4.39535356 | -3.43521320 | -2.77050500 |
| H           | -5.66640256 | -3.61516520 | -1.55125500 |
| <b>TS6S</b> |             |             |             |
| C           | -0.40102300 | 0.05932800  | 2.38409600  |
| C           | -0.40709700 | -1.35863200 | 2.89929500  |
| H           | 0.10540700  | 0.72937300  | 3.09467700  |
| H           | -1.00378000 | -1.98264000 | 2.23297900  |
| H           | 0.60659300  | -1.75914700 | 2.96575700  |
| H           | -0.85500700 | -1.37995300 | 3.89566000  |
| O           | 1.44192700  | 0.84327300  | 1.03819500  |
| C           | 0.30584200  | 0.37845800  | 1.04640100  |
| C           | 1.62486800  | -2.62772300 | -1.60490200 |
| C           | 2.71638700  | -2.97489400 | -2.56928100 |
| C           | 0.57313200  | -1.45043200 | -0.02669000 |
| H           | 2.45821400  | -2.57178300 | -3.56014400 |
| N           | 0.45138300  | -3.17238800 | -1.53194500 |
| N           | 1.74794000  | -1.59417700 | -0.71363300 |
| N           | -0.17421700 | -2.43120100 | -0.55854000 |
| C           | -1.54386000 | -2.76472300 | -0.29334300 |
| C           | -1.80738000 | -3.80123700 | 0.61433500  |
| C           | -2.54371400 | -2.15312900 | -1.04744200 |
| C           | -3.13526500 | -4.15378200 | 0.82711000  |
| C           | -3.86086600 | -2.56718600 | -0.82040900 |
| C           | -4.17691400 | -3.53964200 | 0.12199300  |
| H           | -3.36376300 | -4.94280900 | 1.53987900  |
| H           | -4.65572400 | -2.10076900 | -1.39881000 |
| O           | 3.94396600  | -2.45664300 | -2.12094700 |
| H           | 2.81532400  | -4.05857400 | -2.64983300 |
| C           | 3.87177700  | -1.05914000 | -1.87867100 |
| H           | 3.52938200  | -0.53934600 | -2.78401100 |



|   |             |             |             |
|---|-------------|-------------|-------------|
| C | 2.95839800  | -0.76561100 | -0.66494500 |
| H | 2.62776600  | 0.27356700  | -0.68876400 |
| C | 5.26180100  | -0.63252200 | -1.39942600 |
| H | 5.41449900  | 0.43638600  | -1.58747900 |
| C | 5.20611300  | -0.92119400 | 0.08328700  |
| C | 3.88021600  | -1.01408100 | 0.50754400  |
| C | 6.24573700  | -1.08132900 | 0.99040500  |
| H | 7.28016600  | -1.01631800 | 0.66550800  |
| C | 5.93759200  | -1.34326000 | 2.32577700  |
| C | 3.56739500  | -1.26147600 | 1.83505900  |
| H | 2.53028300  | -1.30466100 | 2.14887100  |
| C | 4.61004500  | -1.43386000 | 2.74488900  |
| H | 4.38808200  | -1.63702300 | 3.78771800  |
| H | 6.73806000  | -1.48118200 | 3.04579400  |
| H | 6.03737300  | -1.18801300 | -1.93207300 |
| C | -1.80071800 | 1.43685500  | 1.18870600  |
| O | -1.74597400 | 0.47681800  | 2.20954800  |
| H | -1.46433000 | 2.42359600  | 1.55697000  |
| N | -0.79114900 | 0.92029200  | 0.21833300  |
| S | -0.38217000 | 1.81117100  | -1.13580300 |
| O | -1.62679300 | 2.09776300  | -1.83431900 |
| O | 0.67620300  | 1.05872400  | -1.79727700 |
| C | 0.26372600  | 3.38619400  | -0.60666000 |
| C | -0.57961600 | 4.49183500  | -0.67445700 |
| C | 1.58461000  | 3.51098100  | -0.17575600 |
| C | -0.09888000 | 5.73629600  | -0.27721300 |
| H | -1.58538100 | 4.37505500  | -1.06306600 |
| C | 2.04459700  | 4.76156800  | 0.21146100  |
| H | 2.22364600  | 2.63838600  | -0.13382000 |
| C | 1.21290400  | 5.88777700  | 0.17406300  |
| H | -0.75084900 | 6.60327600  | -0.32930400 |
| H | 3.07158500  | 4.86987000  | 0.54926400  |
| C | 1.73779400  | 7.23100400  | 0.60714800  |
| H | 2.03320600  | 7.20979200  | 1.66033500  |
| H | 2.62197200  | 7.50829200  | 0.02620500  |
| H | 0.98566500  | 8.01166300  | 0.47943600  |
| C | -3.21623700 | 1.52862900  | 0.68611300  |
| C | -3.99716700 | 0.37656600  | 0.62266200  |
| C | -3.76408000 | 2.75859000  | 0.33338400  |
| C | -5.31109600 | 0.45259600  | 0.17230800  |
| H | -3.57013400 | -0.56854700 | 0.94011300  |
| C | -5.07746900 | 2.83560800  | -0.12007100 |
| H | -3.16045900 | 3.65865200  | 0.41542200  |
| C | -5.85119000 | 1.68058000  | -0.20551000 |

|           |             |             |             |
|-----------|-------------|-------------|-------------|
| H         | -5.91590200 | -0.44879700 | 0.12691400  |
| H         | -5.49843000 | 3.79570600  | -0.40031200 |
| H         | -6.87701100 | 1.73953500  | -0.55533700 |
| C         | -5.60994800 | -3.92068200 | 0.38993500  |
| H         | -6.25633700 | -3.63755600 | -0.44391100 |
| H         | -5.71051300 | -4.99651700 | 0.55441700  |
| H         | -5.98094000 | -3.41544300 | 1.28801500  |
| C         | -2.25870600 | -1.09819100 | -2.08037100 |
| H         | -2.66640500 | -1.40552500 | -3.04793200 |
| H         | -2.73334500 | -0.15275300 | -1.80070400 |
| H         | -1.19092800 | -0.90722700 | -2.20050900 |
| C         | -0.67989500 | -4.54701800 | 1.27823700  |
| H         | 0.08527000  | -3.86895700 | 1.66498300  |
| H         | -1.05266700 | -5.15964000 | 2.10114100  |
| H         | -0.18911200 | -5.20458900 | 0.55332800  |
| <b>PR</b> |             |             |             |
| C         | 0.52713221  | 2.02026033  | 0.04732792  |
| C         | 0.83826112  | 4.10242661  | -0.72030567 |
| C         | -0.19310061 | 4.04589363  | 0.40385019  |
| H         | -0.36470018 | 1.83128107  | -0.51287010 |
| H         | -0.21206467 | 4.94174710  | 0.98864666  |
| O         | 1.08779292  | 5.08635247  | -1.46407602 |
| N         | 1.47999391  | 2.80318193  | -0.75776578 |
| O         | 0.21329859  | 2.88989935  | 1.16401443  |
| C         | -1.59889881 | 3.81598809  | -0.18136332 |
| H         | -2.30525068 | 3.71604978  | 0.61611983  |
| H         | -1.87009550 | 4.64900139  | -0.79572575 |
| H         | -1.59810614 | 2.92317356  | -0.77109340 |
| C         | 1.12719710  | 0.67242898  | 0.48877185  |
| C         | 2.05550967  | 0.01661640  | -0.33102548 |
| C         | 0.74494362  | 0.10171499  | 1.71028315  |
| C         | 2.60156950  | -1.20990961 | 0.07068895  |
| H         | 2.34736597  | 0.45236738  | -1.26367814 |
| C         | 1.29100468  | -1.12481023 | 2.11199827  |
| H         | 0.03615631  | 0.60244233  | 2.33621662  |
| C         | 2.21931696  | -1.78062292 | 1.29220081  |
| H         | 3.31035567  | -1.71063776 | -0.55524514 |
| H         | 0.99914604  | -1.56056281 | 3.04464942  |
| H         | 2.63624666  | -2.71710215 | 1.59891930  |
| S         | 3.01933430  | 2.86593633  | -0.01574624 |
| O         | 3.90204302  | 3.74744528  | -0.79259336 |
| O         | 3.59540162  | 1.51480490  | 0.03236264  |
| C         | 2.85479875  | 3.50007290  | 1.63930629  |
| C         | 3.25496109  | 2.71906990  | 2.73192994  |

|   |            |            |            |
|---|------------|------------|------------|
| C | 2.32509706 | 4.78033377 | 1.84971108 |
| C | 3.12541871 | 3.21832646 | 4.03495856 |
| H | 3.65939865 | 1.74156171 | 2.57128132 |
| C | 2.19555452 | 5.27959027 | 3.15273973 |
| H | 2.01956295 | 5.37664637 | 1.01546877 |
| C | 2.59571395 | 4.49858603 | 4.24536356 |
| H | 3.43094778 | 2.62201172 | 4.86920118 |
| H | 1.79111408 | 6.25709724 | 3.31338858 |
| C | 2.45335650 | 5.04721832 | 5.67726334 |
| H | 2.29148600 | 4.23576332 | 6.35567231 |
| H | 3.34755477 | 5.56750858 | 5.95040702 |
| H | 1.62211802 | 5.71957563 | 5.72060208 |

**PS**

|   |             |             |             |
|---|-------------|-------------|-------------|
| C | -1.89665200 | 1.07276200  | 0.34218000  |
| C | -2.31222800 | -1.12373700 | -0.46540200 |
| C | -3.28852200 | -0.13947600 | -1.09719800 |
| H | -2.40246600 | 1.41606800  | 1.25287700  |
| H | -4.26433700 | -0.27764400 | -0.60787100 |
| O | -2.17730500 | -2.29362600 | -0.72742900 |
| N | -1.61242200 | -0.37472000 | 0.46539100  |
| O | -2.75176600 | 1.13836700  | -0.78058200 |
| C | -3.40846300 | -0.31391500 | -2.59466200 |
| H | -3.75929000 | -1.32524800 | -2.81025800 |
| H | -4.11615700 | 0.40787000  | -3.00502900 |
| H | -2.43593800 | -0.16885800 | -3.07108600 |
| C | -0.64567300 | 1.87744600  | 0.08049800  |
| C | -0.13538700 | 2.73748300  | 1.04810100  |
| C | 0.02534800  | 1.71039400  | -1.13110500 |
| C | 1.05185100  | 3.42801600  | 0.80710800  |
| H | -0.65357300 | 2.84683300  | 1.99647700  |
| C | 1.21000700  | 2.39484900  | -1.37026300 |
| H | -0.38406200 | 1.03457500  | -1.87706300 |
| C | 1.72497900  | 3.25410000  | -0.39889800 |
| H | 1.44986800  | 4.09826500  | 1.56193300  |
| H | 1.73522700  | 2.25666100  | -2.30972300 |
| H | 2.65095000  | 3.78909000  | -0.58510200 |
| S | -0.52503400 | -0.99038900 | 1.60922400  |
| O | -0.98145700 | -2.32185000 | 1.94352600  |
| O | -0.43049100 | 0.05629100  | 2.61216700  |
| C | 0.99638900  | -1.09391200 | 0.71892300  |
| C | 1.96973100  | -0.12338600 | 0.92399100  |
| C | 1.15548000  | -2.12247600 | -0.20810800 |
| C | 3.13899800  | -0.19100900 | 0.17532800  |

|   |            |             |             |
|---|------------|-------------|-------------|
| H | 1.80029100 | 0.67368600  | 1.64073300  |
| C | 2.32998000 | -2.16467700 | -0.94715200 |
| H | 0.36781800 | -2.85735800 | -0.34555600 |
| C | 3.33475300 | -1.20585400 | -0.76498300 |
| H | 3.90615500 | 0.56467800  | 0.31706300  |
| H | 2.47319800 | -2.95424500 | -1.67897300 |
| C | 4.61523400 | -1.28533600 | -1.55318100 |
| H | 5.07419900 | -0.30063600 | -1.66385500 |
| H | 5.33661800 | -1.93317700 | -1.04463300 |
| H | 4.44220300 | -1.70238800 | -2.54777800 |

**TS4<sub>N</sub>**

|   |             |             |             |
|---|-------------|-------------|-------------|
| C | 0.54717000  | 0.15059000  | 1.44363200  |
| C | 1.18792500  | -0.67718400 | 2.52329400  |
| H | 0.84918400  | 1.17871200  | 1.33081100  |
| H | 1.91767200  | -0.08313100 | 3.07605100  |
| H | 0.42780900  | -1.05793800 | 3.21426100  |
| H | 1.70700900  | -1.56087600 | 2.12546600  |
| O | -1.32422900 | -1.29571900 | 1.36918500  |
| C | -0.72130400 | -0.25546000 | 1.02289100  |
| C | -3.01040100 | 1.13872300  | -1.44895900 |
| C | -4.24452700 | 0.97477200  | -2.28153700 |
| C | -1.46833500 | 0.58847600  | 0.00576000  |
| H | -3.96233600 | 0.53305500  | -3.24959800 |
| N | -2.11915400 | 2.08107900  | -1.53658400 |
| N | -2.66648300 | 0.21412100  | -0.50598500 |
| N | -1.16343300 | 1.72787300  | -0.63098200 |
| C | -0.08999400 | 2.65880400  | -0.38989200 |
| C | -0.13776300 | 3.40080800  | 0.79741400  |
| C | 0.89331000  | 2.83602100  | -1.36496600 |
| C | 0.90373100  | 4.29069500  | 1.03672700  |
| C | 1.90793100  | 3.74875500  | -1.07364900 |
| C | 1.94605100  | 4.45823000  | 0.12280600  |
| H | 0.90146400  | 4.86589400  | 1.95904700  |
| H | 2.70557300  | 3.87905700  | -1.79952400 |
| O | -5.17478700 | 0.16836000  | -1.60719200 |
| H | -4.70146600 | 1.94875700  | -2.46143200 |
| C | -4.63446100 | -1.09450900 | -1.24142000 |
| H | -4.26247500 | -1.61510700 | -2.13378200 |
| C | -3.53910500 | -0.92461700 | -0.16406200 |
| H | -2.90006500 | -1.80614500 | -0.10043300 |
| C | -5.74535900 | -1.83769900 | -0.49648100 |
| H | -5.55518100 | -2.91713100 | -0.52016200 |
| C | -5.61903200 | -1.29118600 | 0.90768800  |

|   |             |             |             |
|---|-------------|-------------|-------------|
| C | -4.35063800 | -0.74165700 | 1.10112300  |
| C | -6.55396100 | -1.27750900 | 1.93381100  |
| H | -7.54341600 | -1.70076100 | 1.78801500  |
| C | -6.20470100 | -0.69296900 | 3.15130800  |
| C | -3.99297300 | -0.16634800 | 2.31159100  |
| H | -2.99858700 | 0.24046900  | 2.46052200  |
| C | -4.93813800 | -0.13923400 | 3.33684000  |
| H | -4.68313900 | 0.31308600  | 4.28968100  |
| H | -6.92722600 | -0.66342400 | 3.96073800  |
| H | -6.71454000 | -1.64821500 | -0.96352500 |
| C | 1.76494100  | -1.52069200 | -0.80893400 |
| O | 2.47609100  | -1.00487600 | -1.85260200 |
| H | 2.32436300  | -2.15437300 | -0.10304500 |
| N | 1.72704800  | -0.10640100 | -0.50142800 |
| S | 3.28603400  | 0.59501100  | -0.04044300 |
| O | 3.08200000  | 1.34702700  | 1.19287400  |
| O | 3.77808600  | 1.31827300  | -1.20261300 |
| C | 4.40793300  | -0.73848200 | 0.32333200  |
| C | 5.10692100  | -1.35907500 | -0.71199700 |
| C | 4.60678500  | -1.09570100 | 1.65220300  |
| C | 6.00280500  | -2.37002400 | -0.39583700 |
| H | 4.93024500  | -1.04925200 | -1.73456200 |
| C | 5.51054800  | -2.11264500 | 1.94651800  |
| H | 4.07399100  | -0.57330000 | 2.43842500  |
| C | 6.21478200  | -2.76318400 | 0.93192700  |
| H | 6.55236500  | -2.86507300 | -1.19171300 |
| H | 5.67578300  | -2.39832700 | 2.98112500  |
| C | 7.19963800  | -3.85769400 | 1.24759100  |
| H | 8.21588000  | -3.55097300 | 0.98226600  |
| H | 7.18762100  | -4.10990800 | 2.30957200  |
| H | 6.97223600  | -4.76229500 | 0.67674300  |
| C | 0.43309800  | -2.11276600 | -1.18790800 |
| C | -0.26989400 | -1.53520900 | -2.24712000 |
| C | -0.05167900 | -3.26610400 | -0.58010000 |
| C | -1.44752900 | -2.11727400 | -2.70192200 |
| H | 0.14368500  | -0.64895900 | -2.71981100 |
| C | -1.22644000 | -3.85795900 | -1.04151800 |
| H | 0.49150800  | -3.70576300 | 0.25200500  |
| C | -1.92056600 | -3.28901500 | -2.10636800 |
| H | -1.98236000 | -1.67695800 | -3.53957500 |
| H | -1.59486400 | -4.76552000 | -0.57443800 |
| H | -2.82699700 | -3.76048400 | -2.47677300 |
| C | 0.91723800  | 2.08611300  | -2.66962500 |
| H | 1.58404700  | 1.22146900  | -2.58811900 |

|   |             |            |             |
|---|-------------|------------|-------------|
| H | -0.07635200 | 1.74387800 | -2.96429100 |
| H | 1.29904200  | 2.73764300 | -3.45909300 |
| C | -1.25596000 | 3.22529900 | 1.79181000  |
| H | -2.23394300 | 3.20520900 | 1.29984700  |
| H | -1.13991400 | 2.28674200 | 2.34594600  |
| H | -1.25339000 | 4.04458300 | 2.51228900  |
| C | 3.10949000  | 5.35895600 | 0.43817100  |
| H | 3.91732200  | 4.77058300 | 0.88566700  |
| H | 3.50424800  | 5.82898700 | -0.46547400 |
| H | 2.83030500  | 6.14212000 | 1.14674900  |

**TS4<sub>c</sub>**

|   |             |             |             |
|---|-------------|-------------|-------------|
| C | 1.18393000  | -1.01449700 | -1.63044200 |
| C | 1.51405800  | -0.88588200 | -3.09725200 |
| H | 1.85725000  | -1.61176300 | -1.02508400 |
| H | 2.59209300  | -0.92649700 | -3.26248700 |
| H | 1.03565800  | -1.68108000 | -3.68142100 |
| H | 1.14194600  | 0.06601700  | -3.49284500 |
| O | -1.12677200 | -1.17135900 | -2.17118700 |
| C | -0.19225800 | -1.21533300 | -1.36172500 |
| C | -1.85136300 | -1.10517400 | 1.87284400  |
| C | -2.99342500 | -0.57013600 | 2.67646800  |
| C | -0.62624500 | -1.38071400 | 0.08975400  |
| H | -2.71599900 | 0.44281700  | 3.00615000  |
| N | -0.71706400 | -1.55467500 | 2.31944500  |
| N | -1.85712500 | -1.02703900 | 0.51121300  |
| N | 0.04050500  | -1.72483300 | 1.20034900  |
| C | 1.34057600  | -2.31998800 | 1.35519600  |
| C | 1.60908100  | -3.53161900 | 0.70384600  |
| C | 2.25122400  | -1.70362800 | 2.22402500  |
| C | 2.86860200  | -4.09564900 | 0.89773500  |
| C | 3.48822700  | -2.32714900 | 2.39305400  |
| C | 3.82045300  | -3.50892400 | 1.73217000  |
| H | 3.10305700  | -5.03008200 | 0.39443200  |
| H | 4.21543300  | -1.86343300 | 3.05495800  |
| O | -4.16569300 | -0.55365200 | 1.90567700  |
| H | -3.16818800 | -1.19419900 | 3.55394000  |
| C | -4.01638300 | 0.15736000  | 0.68144000  |
| H | -3.70280200 | 1.19120300  | 0.87795200  |
| C | -3.03334200 | -0.57956100 | -0.25494000 |
| H | -2.66708400 | 0.08261900  | -1.04017700 |
| C | -5.35705300 | 0.01945300  | -0.04369300 |
| H | -5.46719500 | 0.81442800  | -0.78956600 |
| C | -5.22978800 | -1.33481900 | -0.70528400 |

|   |             |             |             |
|---|-------------|-------------|-------------|
| C | -3.88640600 | -1.69674400 | -0.81597400 |
| C | -6.22435200 | -2.18148300 | -1.17548400 |
| H | -7.27178100 | -1.90786500 | -1.08913000 |
| C | -5.85411600 | -3.39887000 | -1.74783100 |
| C | -3.50899900 | -2.89885000 | -1.39564600 |
| H | -2.45952500 | -3.15164800 | -1.50513500 |
| C | -4.51010200 | -3.75484300 | -1.85544400 |
| H | -4.23959500 | -4.70380200 | -2.30717100 |
| H | -6.61950900 | -4.07695700 | -2.11182000 |
| H | -6.18523400 | 0.09253700  | 0.66483800  |
| C | 2.05014300  | 0.69283800  | -0.54135100 |
| O | 2.26338600  | 2.35093700  | 0.19005700  |
| H | 1.83243200  | 0.20905500  | 0.40240000  |
| N | 1.37845000  | 1.90781000  | -0.82014200 |
| S | -0.20617100 | 2.02365100  | -0.15965600 |
| O | -0.30977500 | 1.32563600  | 1.13118900  |
| O | -1.15823200 | 1.66909000  | -1.21086200 |
| C | -0.29645100 | 3.76341300  | 0.13817000  |
| C | -0.97833700 | 4.55766800  | -0.77868800 |
| C | 0.29148500  | 4.29720200  | 1.28064400  |
| C | -1.07437300 | 5.92174600  | -0.53523800 |
| H | -1.42351900 | 4.10485100  | -1.65811800 |
| C | 0.18466700  | 5.66505400  | 1.50269800  |
| H | 0.82637400  | 3.64765200  | 1.96322100  |
| C | -0.49720600 | 6.49149000  | 0.60472000  |
| H | -1.60511400 | 6.55634500  | -1.23943900 |
| H | 0.64040400  | 6.10040600  | 2.38697600  |
| C | -0.62651300 | 7.97058900  | 0.85777100  |
| H | -1.66407800 | 8.23310000  | 1.08671700  |
| H | -0.00470700 | 8.28574000  | 1.69771000  |
| H | -0.33113700 | 8.54483900  | -0.02435600 |
| C | 3.36963700  | 0.50943400  | -1.18848600 |
| C | 4.18973100  | -0.54747400 | -0.78970300 |
| C | 3.79477600  | 1.36788200  | -2.20463500 |
| C | 5.41642300  | -0.75577500 | -1.41120100 |
| H | 3.85977500  | -1.21529300 | 0.00288500  |
| C | 5.02101500  | 1.15526600  | -2.82447700 |
| H | 3.15746100  | 2.19620200  | -2.49481600 |
| C | 5.83397100  | 0.09196400  | -2.43461600 |
| H | 6.04567100  | -1.58263500 | -1.09642900 |
| H | 5.34499700  | 1.82324700  | -3.61628300 |
| H | 6.78934100  | -0.07187800 | -2.92273700 |
| C | 1.94303600  | -0.43200800 | 2.97315300  |
| H | 1.28597600  | 0.23962500  | 2.41533800  |

|   |             |             |             |
|---|-------------|-------------|-------------|
| H | 1.44270000  | -0.66581100 | 3.91755400  |
| H | 2.87195700  | 0.09673200  | 3.19509400  |
| C | 0.59986100  | -4.22118300 | -0.17682900 |
| H | -0.41085600 | -4.15621100 | 0.23698300  |
| H | 0.58100600  | -3.77939900 | -1.17946400 |
| H | 0.85634800  | -5.27659000 | -0.28092300 |
| C | 5.18458100  | -4.12520200 | 1.89782500  |
| H | 5.88829000  | -3.69546000 | 1.17734900  |
| H | 5.58310500  | -3.94072300 | 2.89784600  |
| H | 5.15453000  | -5.20370800 | 1.72904200  |

**M4<sub>N</sub>**

|   |             |             |             |
|---|-------------|-------------|-------------|
| C | 0.88936700  | -0.28187100 | 1.14135800  |
| C | 1.34543100  | -1.34301000 | 2.14628600  |
| H | 1.04503200  | 0.70859100  | 1.59818300  |
| H | 2.42210700  | -1.26037900 | 2.29853500  |
| H | 0.84096800  | -1.19878800 | 3.10323700  |
| H | 1.11661200  | -2.34968600 | 1.79292800  |
| O | -1.31230500 | -1.05141200 | 1.69945700  |
| C | -0.61366600 | -0.37172800 | 0.98219400  |
| C | -2.92265200 | 0.98897600  | -1.46799900 |
| C | -4.19980500 | 0.84587200  | -2.23767600 |
| C | -1.35735300 | 0.43878900  | -0.06253400 |
| H | -3.98563500 | 0.30277300  | -3.17025700 |
| N | -1.96975200 | 1.85877600  | -1.65607400 |
| N | -2.60628600 | 0.12094400  | -0.46639400 |
| N | -1.00320800 | 1.50874400  | -0.77116900 |
| C | 0.07819500  | 2.43549500  | -0.53935700 |
| C | 0.06159300  | 3.14838100  | 0.66580200  |
| C | 0.99472700  | 2.66209800  | -1.56721400 |
| C | 1.06078200  | 4.09843800  | 0.84904400  |
| C | 1.96371600  | 3.63369400  | -1.32687500 |
| C | 2.02511900  | 4.34150300  | -0.12905700 |
| H | 1.08364300  | 4.66352100  | 1.77717500  |
| H | 2.71730200  | 3.80686000  | -2.08970400 |
| O | -5.15322200 | 0.17239400  | -1.45831300 |
| H | -4.59450200 | 1.83181700  | -2.48670300 |
| C | -4.69463900 | -1.09183700 | -0.99804200 |
| H | -4.38716800 | -1.71331200 | -1.84553700 |
| C | -3.55441200 | -0.89426900 | 0.03060800  |
| H | -2.99417900 | -1.82302200 | 0.17034300  |
| C | -5.82335100 | -1.67983000 | -0.15174500 |
| H | -5.69951300 | -2.76536400 | -0.06336800 |
| C | -5.62166100 | -0.99012200 | 1.17755000  |



|   |             |             |             |
|---|-------------|-------------|-------------|
| C | -4.31959900 | -0.49547000 | 1.27976800  |
| C | -6.53031800 | -0.79672400 | 2.20840700  |
| H | -7.54344800 | -1.17920500 | 2.13024400  |
| C | -6.12542700 | -0.08252900 | 3.33614500  |
| C | -3.91331800 | 0.22256900  | 2.39546400  |
| H | -2.90567200 | 0.61542700  | 2.47413900  |
| C | -4.83228000 | 0.43025700  | 3.42448300  |
| H | -4.53525100 | 0.99531200  | 4.30167000  |
| H | -6.82738500 | 0.08601500  | 4.14631800  |
| H | -6.79343000 | -1.47926600 | -0.61166800 |
| C | 1.65883400  | -1.63210100 | -1.05520700 |
| O | 2.30524800  | -1.40821300 | -2.13874400 |
| H | 2.11882100  | -2.33529000 | -0.31306900 |
| N | 1.57052700  | -0.24716500 | -0.15375200 |
| S | 3.07119800  | 0.52050600  | -0.05811100 |
| O | 2.97114900  | 1.46551400  | 1.06491000  |
| O | 3.46644800  | 1.03795700  | -1.35734000 |
| C | 4.31736500  | -0.67820200 | 0.41811900  |
| C | 4.73195400  | -1.66588900 | -0.47644900 |
| C | 4.90859000  | -0.54083200 | 1.67031400  |
| C | 5.74659700  | -2.53010300 | -0.08283300 |
| H | 4.22728700  | -1.74483100 | -1.43962600 |
| C | 5.92724200  | -1.41457800 | 2.03913100  |
| H | 4.57460300  | 0.24912100  | 2.33476800  |
| C | 6.36090000  | -2.41703600 | 1.16974900  |
| H | 6.07510500  | -3.30993300 | -0.76529600 |
| H | 6.39630400  | -1.31015700 | 3.01364600  |
| C | 7.48073300  | -3.34878500 | 1.55403000  |
| H | 8.39036000  | -3.11051700 | 0.99361800  |
| H | 7.71298700  | -3.27443200 | 2.61851200  |
| H | 7.22248500  | -4.38719000 | 1.32931000  |
| C | 0.20921100  | -2.09621300 | -1.29501000 |
| C | -0.48828400 | -1.54545900 | -2.37722600 |
| C | -0.33778000 | -3.19712400 | -0.63671100 |
| C | -1.70290800 | -2.08170500 | -2.78703500 |
| H | -0.02020800 | -0.73030200 | -2.92045500 |
| C | -1.55075400 | -3.75223100 | -1.05277100 |
| H | 0.21157300  | -3.66091600 | 0.17979500  |
| C | -2.23044800 | -3.20087900 | -2.13462900 |
| H | -2.21849400 | -1.66462600 | -3.64931100 |
| H | -1.94618800 | -4.63043300 | -0.55114200 |
| H | -3.15459400 | -3.65332800 | -2.48451500 |
| C | 1.00333600  | 1.85117000  | -2.83177600 |
| H | 1.42942700  | 0.85862800  | -2.62691100 |

|   |             |            |             |
|---|-------------|------------|-------------|
| H | 0.00038800  | 1.74352300 | -3.25258300 |
| H | 1.64000300  | 2.33371000 | -3.57527500 |
| C | -0.99487500 | 2.93545500 | 1.72333100  |
| H | -1.99321200 | 2.81197100 | 1.28983200  |
| H | -0.78589500 | 2.05670200 | 2.34662900  |
| H | -1.02827900 | 3.79651000 | 2.39245700  |
| C | 3.14437600  | 5.31423100 | 0.12441800  |
| H | 4.00600100  | 4.77844000 | 0.53606500  |
| H | 3.46599700  | 5.80070900 | -0.79918400 |
| H | 2.85215100  | 6.08383000 | 0.84262800  |

**M4<sub>C</sub>**

|   |             |             |             |
|---|-------------|-------------|-------------|
| C | 1.11619200  | -0.49937100 | -1.78343800 |
| C | 1.00791600  | 0.19136300  | -3.14309300 |
| H | 1.72443100  | -1.41103800 | -1.91256400 |
| H | 2.00385400  | 0.50704700  | -3.45988100 |
| H | 0.59238100  | -0.48712400 | -3.88872700 |
| H | 0.36454100  | 1.06799900  | -3.05952300 |
| O | -1.06442900 | -1.42026300 | -2.18750900 |
| C | -0.22878200 | -1.07431500 | -1.38572300 |
| C | -1.81648800 | -1.21884900 | 1.87495100  |
| C | -2.94461800 | -0.73983900 | 2.73362300  |
| C | -0.61100100 | -1.30732700 | 0.07303400  |
| H | -2.63571700 | 0.23252800  | 3.14562500  |
| N | -0.65815500 | -1.66875200 | 2.26530200  |
| N | -1.84994100 | -1.04614200 | 0.52447500  |
| N | 0.08712700  | -1.71542500 | 1.13337900  |
| C | 1.40599100  | -2.29554200 | 1.19293900  |
| C | 1.62885600  | -3.48175800 | 0.48538800  |
| C | 2.37137300  | -1.68303100 | 2.01110800  |
| C | 2.89856600  | -4.05377800 | 0.58441100  |
| C | 3.61467300  | -2.30780600 | 2.06961400  |
| C | 3.89987800  | -3.47996700 | 1.36553500  |
| H | 3.10001700  | -4.97612000 | 0.04632400  |
| H | 4.39200400  | -1.85029900 | 2.67626500  |
| O | -4.12512700 | -0.62980000 | 1.98238500  |
| H | -3.12584100 | -1.43542900 | 3.55403500  |
| C | -3.98151200 | 0.14782400  | 0.79873100  |
| H | -3.62737100 | 1.15801200  | 1.03967100  |
| C | -3.04480400 | -0.57730100 | -0.19254100 |
| H | -2.69759700 | 0.11123000  | -0.96576500 |
| C | -5.33829100 | 0.07976100  | 0.09530500  |
| H | -5.43244600 | 0.90035600  | -0.62464800 |
| C | -5.26842500 | -1.26064900 | -0.60340400 |

|   |             |             |             |
|---|-------------|-------------|-------------|
| C | -3.93972200 | -1.66810500 | -0.74543600 |
| C | -6.29996800 | -2.06546900 | -1.06566900 |
| H | -7.33504900 | -1.75658600 | -0.95463300 |
| C | -5.98407000 | -3.28905300 | -1.65758700 |
| C | -3.61723300 | -2.88192200 | -1.33359400 |
| H | -2.58245700 | -3.18671600 | -1.44851200 |
| C | -4.65698400 | -3.69568300 | -1.78542800 |
| H | -4.42961700 | -4.65304200 | -2.24278500 |
| H | -6.78005900 | -3.93473700 | -2.01443200 |
| H | -6.15174800 | 0.15930000  | 0.81970000  |
| C | 1.89528500  | 0.32223800  | -0.72886100 |
| O | 2.23970800  | 2.22260300  | 0.55108200  |
| H | 1.83830700  | -0.18692300 | 0.23137500  |
| N | 1.48201800  | 1.72717200  | -0.49961200 |
| S | -0.11005600 | 1.88819600  | 0.01915800  |
| O | -0.38592300 | 1.29545400  | 1.34314900  |
| O | -1.01251400 | 1.43300100  | -1.06667900 |
| C | -0.27510800 | 3.64744000  | 0.15472100  |
| C | -1.08339400 | 4.30076700  | -0.76579400 |
| C | 0.35520900  | 4.33246300  | 1.19364900  |
| C | -1.26153100 | 5.67725800  | -0.64649300 |
| H | -1.55872800 | 3.73584800  | -1.56024900 |
| C | 0.16509600  | 5.70301600  | 1.29169100  |
| H | 0.99535400  | 3.78373500  | 1.87235900  |
| C | -0.64232800 | 6.39326800  | 0.37816300  |
| H | -1.88800000 | 6.20116500  | -1.36270500 |
| H | 0.65670500  | 6.25429700  | 2.08878100  |
| C | -0.83693800 | 7.88080900  | 0.51514400  |
| H | -1.40031500 | 8.11706900  | 1.42325700  |
| H | 0.12567800  | 8.39478900  | 0.58624900  |
| H | -1.38205800 | 8.29108900  | -0.33736400 |
| C | 3.36681700  | 0.33507900  | -1.12742600 |
| C | 4.07590500  | -0.86603300 | -1.09288000 |
| C | 4.01378400  | 1.49215200  | -1.56423500 |
| C | 5.40835600  | -0.92217900 | -1.49454200 |
| H | 3.58500600  | -1.77140800 | -0.74080700 |
| C | 5.34393700  | 1.43486400  | -1.97133800 |
| H | 3.47655400  | 2.43229100  | -1.53458000 |
| C | 6.04594900  | 0.23139100  | -1.94065900 |
| H | 5.94320700  | -1.86688800 | -1.45930000 |
| H | 5.83927900  | 2.34124100  | -2.30617700 |
| H | 7.08422400  | 0.19588400  | -2.25583300 |
| C | 2.13559400  | -0.38469000 | 2.73733900  |
| H | 2.22585200  | 0.47942700  | 2.05604100  |

|   |             |             |             |
|---|-------------|-------------|-------------|
| H | 1.14226200  | -0.34061900 | 3.18402600  |
| H | 2.88261800  | -0.27356100 | 3.52571600  |
| C | 0.55166500  | -4.15538900 | -0.33013100 |
| H | -0.40796700 | -4.16181100 | 0.19647800  |
| H | 0.39680000  | -3.67077400 | -1.30054900 |
| H | 0.83128700  | -5.19095800 | -0.52890500 |
| C | 5.27327200  | -4.09169700 | 1.44533400  |
| H | 6.02188600  | -3.39566700 | 1.05493700  |
| H | 5.54205100  | -4.31290700 | 2.48202300  |
| H | 5.33177900  | -5.01741400 | 0.86986700  |

**M3<sub>CatI</sub>**

|   |             |             |             |
|---|-------------|-------------|-------------|
| C | 1.19831400  | -0.23744300 | 2.77371400  |
| C | 1.36368000  | -0.28101200 | 4.26425100  |
| H | 2.05956500  | -0.39709300 | 2.13495600  |
| H | 1.74862700  | -1.24930700 | 4.60531900  |
| H | 2.06165500  | 0.48429800  | 4.62395400  |
| H | 0.39603000  | -0.11202500 | 4.74217300  |
| O | -1.17890100 | 0.20372100  | 2.68957400  |
| C | -0.02256600 | -0.00651000 | 2.21946500  |
| P | -0.02857600 | 0.00600000  | 0.34693800  |
| C | 1.56693700  | -0.31046800 | -0.44864100 |
| C | 1.95131300  | -1.62061400 | -0.75383200 |
| C | 2.47352800  | 0.74170200  | -0.62677200 |
| C | 3.22682900  | -1.87119100 | -1.24977000 |
| H | 1.25541500  | -2.44061700 | -0.60454800 |
| C | 3.74664600  | 0.48353100  | -1.12318600 |
| H | 2.18168000  | 1.75810300  | -0.37878100 |
| C | 4.12267100  | -0.82108700 | -1.43666200 |
| H | 3.52110300  | -2.88786700 | -1.48800500 |
| H | 4.44516400  | 1.30141100  | -1.26391900 |
| H | 5.11683000  | -1.01971400 | -1.82385800 |
| C | -0.60447600 | 1.62333200  | -0.24433500 |
| C | -0.41666000 | 2.00200400  | -1.57902100 |
| C | -1.25440300 | 2.48454800  | 0.64617500  |
| C | -0.87011900 | 3.24048400  | -2.01849600 |
| H | 0.10013100  | 1.34258800  | -2.27116600 |
| C | -1.70307800 | 3.72353200  | 0.19525300  |
| H | -1.41149400 | 2.16522500  | 1.67240400  |
| C | -1.51344500 | 4.10151900  | -1.13085000 |
| H | -0.71831200 | 3.53371400  | -3.05207500 |
| H | -2.20377100 | 4.39377500  | 0.88607700  |
| H | -1.86702800 | 5.06791600  | -1.47574600 |
| C | -1.18249300 | -1.25965500 | -0.25384700 |

|   |             |             |             |
|---|-------------|-------------|-------------|
| C | -2.01017800 | -1.92502000 | 0.65540000  |
| C | -1.24784200 | -1.56234900 | -1.61907500 |
| C | -2.89154200 | -2.89925100 | 0.19134300  |
| H | -1.97135400 | -1.65149000 | 1.70532400  |
| C | -2.13089500 | -2.53538000 | -2.07154700 |
| H | -0.59931700 | -1.05278600 | -2.32692300 |
| C | -2.95246300 | -3.20440800 | -1.16490700 |
| H | -3.53487300 | -3.41651100 | 0.89545400  |
| H | -2.17754600 | -2.77265100 | -3.12921000 |
| H | -3.64119700 | -3.96433700 | -1.52005000 |

**TS4<sub>Cat1</sub>**

|   |             |             |             |
|---|-------------|-------------|-------------|
| C | 1.30562100  | 1.76801000  | 1.20514900  |
| C | 1.00108900  | 3.20642600  | 1.49764200  |
| H | 1.42905600  | 1.09447300  | 2.04529500  |
| H | 0.02212200  | 3.32418300  | 1.97108500  |
| H | 1.75316900  | 3.61672300  | 2.18215100  |
| H | 1.01122200  | 3.79659000  | 0.57988700  |
| O | 1.86207700  | 1.93724200  | -1.13413600 |
| C | 1.81907600  | 1.37396600  | -0.02685600 |
| C | -1.32886700 | 1.35069800  | -0.28034800 |
| O | -0.58094300 | 0.79858200  | 0.77232000  |
| H | -0.99662200 | 1.02014200  | -1.27107800 |
| N | -2.28883800 | 0.52752600  | 0.39083100  |
| S | -2.48520700 | -1.01100500 | -0.23962700 |
| O | -1.88834100 | -2.00159400 | 0.65616300  |
| O | -2.12529800 | -1.05948600 | -1.66163800 |
| C | -4.24840300 | -1.15317200 | -0.11511200 |
| C | -5.02662000 | -1.01845200 | -1.25841000 |
| C | -4.81938900 | -1.39115800 | 1.13271400  |
| C | -6.40877800 | -1.12656100 | -1.14321600 |
| H | -4.54947300 | -0.83809100 | -2.21560400 |
| C | -6.20042100 | -1.49036000 | 1.22750400  |
| H | -4.18538900 | -1.49687000 | 2.00701000  |
| C | -7.01243400 | -1.36204900 | 0.09433000  |
| H | -7.02922900 | -1.02644500 | -2.02924200 |
| H | -6.66034300 | -1.67157500 | 2.19484800  |
| C | -8.50739800 | -1.50580000 | 0.20603600  |
| H | -8.79689100 | -2.56027900 | 0.14925400  |
| H | -8.87199900 | -1.11514600 | 1.15887300  |
| H | -9.01726100 | -0.97774000 | -0.60248900 |
| C | -1.60728700 | 2.82183000  | -0.24294700 |
| C | -2.41426800 | 3.37169500  | 0.75341900  |
| C | -1.01570400 | 3.64496800  | -1.19854400 |

|   |             |             |             |
|---|-------------|-------------|-------------|
| C | -2.62190200 | 4.74576900  | 0.79552300  |
| H | -2.87010600 | 2.71192000  | 1.48506100  |
| C | -1.22525400 | 5.02165000  | -1.15507600 |
| H | -0.35965600 | 3.20669100  | -1.94590100 |
| C | -2.02659500 | 5.57178700  | -0.15806500 |
| H | -3.24975900 | 5.17544500  | 1.56978600  |
| H | -0.76016700 | 5.66393400  | -1.89609700 |
| H | -2.19059600 | 6.64438800  | -0.12403200 |
| P | 2.68720500  | -0.30529600 | 0.01264500  |
| C | 2.29266800  | -1.27157600 | 1.48904900  |
| C | 1.10203800  | -2.00400300 | 1.50166600  |
| C | 3.06361700  | -1.15942800 | 2.65290700  |
| C | 0.69197800  | -2.63333500 | 2.67177900  |
| H | 0.47052800  | -2.07080400 | 0.62231100  |
| C | 2.65216000  | -1.80461900 | 3.81426100  |
| H | 3.97423900  | -0.56818200 | 2.65522100  |
| C | 1.46852600  | -2.54103300 | 3.82361400  |
| H | -0.24438500 | -3.18028300 | 2.67219700  |
| H | 3.25220900  | -1.72507600 | 4.71466900  |
| H | 1.14773800  | -3.03470200 | 4.73544200  |
| C | 4.46711800  | 0.01872900  | -0.02377200 |
| C | 5.38033400  | -0.96634500 | 0.37292800  |
| C | 4.92402600  | 1.25049400  | -0.50443500 |
| C | 6.74591700  | -0.71379000 | 0.29601300  |
| H | 5.02533300  | -1.92320800 | 0.74648500  |
| C | 6.29292300  | 1.49352200  | -0.57452700 |
| H | 4.20924700  | 1.99963500  | -0.83199600 |
| C | 7.20085200  | 0.51665900  | -0.17488500 |
| H | 7.45290200  | -1.47581900 | 0.60657500  |
| H | 6.64908500  | 2.44903100  | -0.94437100 |
| H | 8.26675100  | 0.71253200  | -0.23089800 |
| C | 2.27048800  | -1.24251000 | -1.47215000 |
| C | 0.93646000  | -1.24340000 | -1.88307900 |
| C | 3.23065300  | -1.96282900 | -2.18804800 |
| C | 0.55129000  | -1.98518300 | -2.99412900 |
| H | 0.19357200  | -0.67842700 | -1.33189800 |
| C | 2.84153700  | -2.69504700 | -3.30524700 |
| H | 4.27264100  | -1.94662700 | -1.88439100 |
| C | 1.50617200  | -2.70845000 | -3.70496600 |
| H | -0.49339300 | -1.98610600 | -3.28367600 |
| H | 3.58388900  | -3.25383600 | -3.86542600 |
| H | 1.21136700  | -3.28419000 | -4.57651700 |

|   |             |             |             |
|---|-------------|-------------|-------------|
| C | 0.47352600  | -0.59788100 | 2.79141000  |
| C | 0.33286200  | -1.63224900 | 3.86455300  |
| H | 0.92474400  | 0.36233300  | 3.02705700  |
| H | 1.30434600  | -1.95922100 | 4.25499500  |
| H | -0.24951300 | -1.26944700 | 4.72002200  |
| H | -0.17679700 | -2.50447900 | 3.44899500  |
| O | -0.61688800 | -1.79767600 | 1.00270100  |
| C | -0.01782300 | -0.81182300 | 1.53538100  |
| C | 0.98511400  | 1.93640400  | -0.69828200 |
| C | 2.03875500  | 2.86451600  | -1.21774200 |
| C | 0.18986600  | 0.34590000  | 0.59040800  |
| H | 2.02452500  | 3.79549700  | -0.63218800 |
| N | -0.26621400 | 1.84908600  | -1.03066700 |
| N | 1.30713500  | 1.03065600  | 0.28368100  |
| N | -0.74171400 | 0.84770100  | -0.22663900 |
| C | -2.08790800 | 0.41900600  | -0.31663500 |
| C | -2.40285300 | -0.74027700 | -1.01914700 |
| C | -3.08939900 | 1.15501400  | 0.30199800  |
| C | -3.72167700 | -1.16081500 | -1.09509500 |
| C | -4.41158300 | 0.74250700  | 0.22191100  |
| C | -4.72022900 | -0.41896700 | -0.47396600 |
| O | 3.29268400  | 2.23045200  | -1.13520700 |
| H | 1.84409600  | 3.10126000  | -2.26393400 |
| C | 3.63941300  | 1.84643000  | 0.18808600  |
| H | 3.64056700  | 2.72671100  | 0.84437400  |
| C | 2.68542500  | 0.73781400  | 0.69598200  |
| H | 2.70485500  | 0.68545300  | 1.78701000  |
| C | 4.99041700  | 1.13151200  | 0.09495600  |
| H | 5.51169900  | 1.18369800  | 1.05744700  |
| C | 4.59809400  | -0.28947200 | -0.24243200 |
| C | 3.25825700  | -0.51995000 | 0.07374300  |
| C | 5.36861800  | -1.30250600 | -0.79660800 |
| H | 6.40964100  | -1.12986400 | -1.05290600 |
| C | 4.77270900  | -2.54122500 | -1.03517000 |
| C | 2.65116000  | -1.74861400 | -0.15856800 |
| H | 1.60222900  | -1.93235200 | 0.06861500  |
| C | 3.43065400  | -2.75864000 | -0.72508100 |
| H | 2.98196900  | -3.72594500 | -0.92527800 |
| H | 5.35758800  | -3.34179500 | -1.47690000 |
| H | 5.61945900  | 1.60811600  | -0.66045300 |
| F | -2.78344100 | 2.26057100  | 0.96931400  |
| F | -1.46268400 | -1.42093500 | -1.64401100 |
| F | -4.03938400 | -2.26151600 | -1.76671600 |
| F | -5.37511100 | 1.44951400  | 0.80281600  |

|   |             |             |             |
|---|-------------|-------------|-------------|
| F | -5.98166900 | -0.81589600 | -0.56136400 |
|---|-------------|-------------|-------------|

**TS4<sub>Cat2</sub>**

|   |             |             |             |
|---|-------------|-------------|-------------|
| C | 1.84240500  | -0.32113700 | 1.87770100  |
| C | 1.82519900  | -0.68781700 | 3.32834500  |
| H | 2.59239300  | -0.78528300 | 1.25747200  |
| H | 1.11803200  | -0.05703600 | 3.86836300  |
| H | 1.53591700  | -1.73437800 | 3.47371300  |
| H | 2.81997200  | -0.55641400 | 3.77065700  |
| O | 0.34567400  | 1.51634400  | 2.08832900  |
| C | 1.14537500  | 0.80507600  | 1.43302200  |
| C | 0.60438500  | 1.87492000  | -2.01148100 |
| C | -0.31381500 | 2.47929800  | -3.02541300 |
| C | 1.20598600  | 1.13286600  | -0.04266700 |
| H | -0.90717000 | 1.65893000  | -3.45446400 |
| N | 1.64219100  | 1.13573800  | -2.25176700 |
| N | 0.32486500  | 1.93397300  | -0.67149800 |
| N | 2.00875300  | 0.68456500  | -1.01834200 |
| C | 3.10980300  | -0.19808100 | -0.93732800 |
| C | 4.31251700  | 0.21980400  | -0.37835400 |
| C | 2.97966300  | -1.48806700 | -1.44101000 |
| C | 5.38348500  | -0.65609600 | -0.30125500 |
| C | 4.05370400  | -2.36601500 | -1.37550300 |
| C | 5.24902300  | -1.94594300 | -0.80500900 |
| O | -1.13312300 | 3.44487100  | -2.41973600 |
| H | 0.25871100  | 2.96385800  | -3.81741400 |
| C | -1.85137800 | 2.92393400  | -1.30991100 |
| H | -2.42348000 | 2.03784700  | -1.61177500 |
| C | -0.87569700 | 2.61270000  | -0.14875200 |
| H | -1.32894900 | 1.93301500  | 0.57561600  |
| C | -2.68733000 | 4.08338600  | -0.76610800 |
| H | -3.53181100 | 3.70109200  | -0.18096100 |
| C | -1.70047800 | 4.81571000  | 0.11424700  |
| C | -0.64071700 | 3.97705000  | 0.46351400  |
| C | -1.74163300 | 6.12446200  | 0.57579500  |
| H | -2.56180000 | 6.78184600  | 0.30291000  |
| C | -0.70127600 | 6.58341500  | 1.38325700  |
| C | 0.39066600  | 4.42112500  | 1.27843900  |
| H | 1.18843600  | 3.74847700  | 1.57268600  |
| C | 0.35463200  | 5.74036400  | 1.73000200  |
| H | 1.15395000  | 6.11206300  | 2.36276800  |
| H | -0.71230300 | 7.60701300  | 1.74409400  |
| H | -3.08386300 | 4.68550600  | -1.58686600 |
| C | -0.86752100 | -1.34404000 | 1.15338600  |



|   |             |             |             |
|---|-------------|-------------|-------------|
| O | 0.43576700  | -1.49200000 | 0.68368800  |
| H | -1.27800100 | -0.34532200 | 0.96030000  |
| N | -1.02066100 | -2.32480600 | 0.11923100  |
| S | -1.44568800 | -1.67655700 | -1.36630300 |
| O | -0.90889500 | -2.54250300 | -2.40442100 |
| O | -1.17898000 | -0.22989000 | -1.43296800 |
| C | -3.20990000 | -1.87577700 | -1.32316200 |
| C | -4.00563100 | -0.85164200 | -0.81857600 |
| C | -3.76404400 | -3.07651300 | -1.76025400 |
| C | -5.38184200 | -1.03821100 | -0.75482200 |
| H | -3.55018400 | 0.07741600  | -0.48951100 |
| C | -5.14059800 | -3.24312300 | -1.69085000 |
| H | -3.11731600 | -3.85327400 | -2.15444000 |
| C | -5.96673700 | -2.23119100 | -1.18835000 |
| H | -6.01361500 | -0.24560600 | -0.36463400 |
| H | -5.58522500 | -4.17381400 | -2.03213700 |
| C | -7.45963700 | -2.42238800 | -1.14041100 |
| H | -7.71510200 | -3.42716600 | -0.79505700 |
| H | -7.93128000 | -1.69792000 | -0.47355900 |
| H | -7.89627500 | -2.29650400 | -2.13629500 |
| C | -1.13903400 | -1.81015400 | 2.54933400  |
| C | -0.94266600 | -3.14524000 | 2.90462400  |
| C | -1.52861100 | -0.87895900 | 3.50858000  |
| C | -1.14230300 | -3.54449500 | 4.22115600  |
| H | -0.63702900 | -3.85475100 | 2.14171200  |
| C | -1.72717200 | -1.28090000 | 4.82766500  |
| H | -1.62767600 | 0.16612100  | 3.22595900  |
| C | -1.53485800 | -2.61276100 | 5.18311800  |
| H | -0.99235500 | -4.58253100 | 4.50067000  |
| H | -2.02503500 | -0.55403400 | 5.57661900  |
| H | -1.68865100 | -2.92774900 | 6.21055000  |
| F | 1.83830800  | -1.87827300 | -1.97246000 |
| F | 3.94729800  | -3.59807400 | -1.85314700 |
| F | 6.27352100  | -2.78213000 | -0.73846700 |
| F | 6.53202600  | -0.27433100 | 0.24342300  |
| F | 4.41966200  | 1.44495300  | 0.11771200  |

### M3<sub>Cat3</sub>

|   |             |            |             |
|---|-------------|------------|-------------|
| C | -2.41117500 | 1.63961100 | 0.21464300  |
| C | -2.73553000 | 3.09041600 | 0.06314200  |
| H | -3.03953200 | 1.01945400 | 0.84632300  |
| H | -3.70025900 | 3.24857900 | -0.43596200 |
| H | -2.79203300 | 3.60656700 | 1.02930800  |
| H | -1.95926100 | 3.56566200 | -0.54083700 |

|   |             |             |             |
|---|-------------|-------------|-------------|
| O | -0.43317300 | 1.61531000  | -1.15083000 |
| C | -1.31394100 | 1.09274700  | -0.41426400 |
| C | -1.13560300 | -0.36503900 | -0.08637500 |
| N | 0.04694100  | -0.98556900 | 0.02549100  |
| S | -2.41478800 | -1.50291400 | 0.02497200  |
| C | -1.30603900 | -2.80360800 | 0.30042300  |
| H | -1.64131200 | -3.81478900 | 0.47264900  |
| C | -0.03821100 | -2.35519500 | 0.26197700  |
| H | 0.87352500  | -2.91276200 | 0.41922800  |
| C | 1.32876300  | -0.32336500 | 0.04613600  |
| C | 2.37877400  | -0.88908600 | -0.66581000 |
| C | 1.50066200  | 0.81497900  | 0.82496000  |
| C | 3.63798700  | -0.30002900 | -0.59124600 |
| H | 2.20858600  | -1.76118700 | -1.28946700 |
| C | 2.76158800  | 1.39271900  | 0.88973300  |
| H | 0.65602100  | 1.23495800  | 1.36045300  |
| C | 3.82997400  | 0.83688600  | 0.18712900  |
| H | 4.46327400  | -0.72925200 | -1.14889600 |
| H | 2.90937900  | 2.28428700  | 1.48932900  |
| H | 4.81152400  | 1.29539800  | 0.24383800  |

**TS4<sub>Cat3</sub>**

|   |             |             |             |
|---|-------------|-------------|-------------|
| C | -2.55563900 | 1.52892600  | -0.08396200 |
| C | -2.56937500 | 2.97766800  | -0.45547800 |
| H | -3.04714800 | 0.82851400  | -0.74355500 |
| H | -3.59677100 | 3.36039600  | -0.50403600 |
| H | -2.01748500 | 3.56393300  | 0.28183400  |
| H | -2.11370400 | 3.13141400  | -1.43862900 |
| O | -1.74337400 | 1.87437100  | 2.13030800  |
| C | -2.19713000 | 1.14482300  | 1.21063400  |
| C | -2.15796100 | -0.31588000 | 1.57093000  |
| N | -2.54844000 | -1.44152700 | 0.96810900  |
| C | 0.41882900  | 1.16538700  | -0.08234200 |
| O | -0.68255600 | 0.68476700  | -0.78971200 |
| H | 0.47092700  | 0.79381200  | 0.94753000  |
| N | 1.00501700  | 0.34722000  | -1.10920200 |
| S | 1.18289100  | -1.26294600 | -0.67623300 |
| O | 0.87022300  | -2.06502600 | -1.85609900 |
| O | 0.50007900  | -1.58312400 | 0.58256600  |
| C | 2.93035000  | -1.35230500 | -0.38894800 |
| C | 3.41653700  | -1.21929900 | 0.90879800  |
| C | 3.78542800  | -1.52419200 | -1.47371900 |
| C | 4.78995800  | -1.26012600 | 1.11559900  |
| H | 2.72319800  | -1.10506900 | 1.73568800  |

|   |             |             |             |
|---|-------------|-------------|-------------|
| C | 5.15520900  | -1.56246900 | -1.24552500 |
| H | 3.37402300  | -1.64095400 | -2.47084600 |
| C | 5.67539500  | -1.42641800 | 0.04582100  |
| H | 5.18398600  | -1.16690400 | 2.12362000  |
| H | 5.83437700  | -1.70471400 | -2.08112800 |
| C | 7.16287900  | -1.43794900 | 0.28080900  |
| H | 7.55526600  | -0.41600000 | 0.30024300  |
| H | 7.40754500  | -1.90324800 | 1.23850300  |
| H | 7.68497200  | -1.97902300 | -0.51104000 |
| C | 0.69665800  | 2.63138500  | -0.20036600 |
| C | 0.82767200  | 3.21682300  | -1.46063400 |
| C | 0.76363800  | 3.41614500  | 0.94784100  |
| C | 1.03189300  | 4.58676600  | -1.56867300 |
| H | 0.76735700  | 2.58660500  | -2.34280300 |
| C | 0.96818700  | 4.79045300  | 0.83702400  |
| H | 0.61193000  | 2.95365800  | 1.91841300  |
| C | 1.10238200  | 5.37489400  | -0.41894200 |
| H | 1.13589300  | 5.04422200  | -2.54751700 |
| H | 1.01281000  | 5.40380500  | 1.73121200  |
| H | 1.25921100  | 6.44571100  | -0.50513000 |
| S | -1.41933800 | -0.65264900 | 3.07271800  |
| C | -1.62934900 | -2.34599100 | 2.84015200  |
| H | -1.28705900 | -3.06825200 | 3.56519300  |
| C | -2.24405700 | -2.59948500 | 1.66663900  |
| H | -2.51402400 | -3.55032600 | 1.22997300  |
| C | -3.22499500 | -1.51413100 | -0.30603600 |
| C | -2.48731600 | -1.85558100 | -1.43125200 |
| C | -4.59085900 | -1.25855500 | -0.35551700 |
| C | -3.14794200 | -1.92426500 | -2.65503100 |
| H | -1.42160000 | -2.04288300 | -1.35215500 |
| C | -5.23463000 | -1.32936400 | -1.58632600 |
| H | -5.12583400 | -0.99206500 | 0.55024600  |
| C | -4.51291500 | -1.65854000 | -2.73329000 |
| H | -2.58583500 | -2.17825600 | -3.54680900 |
| H | -6.29812900 | -1.12640600 | -1.64884600 |
| H | -5.01884100 | -1.70850800 | -3.69181500 |

### M3<sub>Cat4</sub>

|   |            |             |             |
|---|------------|-------------|-------------|
| C | 2.88737400 | -1.42578400 | -0.43113200 |
| C | 4.12268500 | -2.25523100 | -0.24207800 |
| H | 2.07487600 | -1.81311900 | -1.03556700 |
| H | 3.91826000 | -3.20392900 | 0.26933800  |
| H | 4.61595800 | -2.50556300 | -1.19072900 |
| H | 4.84080300 | -1.69627200 | 0.36324900  |

|   |             |             |             |
|---|-------------|-------------|-------------|
| O | 3.69649800  | 0.66877500  | 0.45328000  |
| C | 2.87426900  | -0.11919200 | -0.03218300 |
| C | -0.10862500 | 2.19935600  | -0.63743600 |
| H | -0.55812000 | 3.00802400  | -0.06076200 |
| H | -0.20997800 | 2.38434800  | -1.71009800 |
| C | 0.30243000  | 0.00610100  | -0.12294900 |
| N | 1.50067100  | 0.53312700  | -0.23574200 |
| N | -0.68736000 | 0.90074700  | -0.29440300 |
| C | 1.35426300  | 1.98059500  | -0.20743300 |
| H | 2.10983500  | 2.46102500  | -0.82600800 |
| S | -0.25893700 | -1.58957500 | 0.22111400  |
| C | -1.97244900 | 0.39235400  | -0.15470100 |
| C | -1.92918300 | -0.97773300 | 0.14008700  |
| C | -3.17919800 | 1.07132000  | -0.27330800 |
| H | -3.20062400 | 2.13193600  | -0.49883000 |
| C | -3.10080800 | -1.69940600 | 0.31923800  |
| H | -3.07167300 | -2.75956900 | 0.54596800  |
| C | -4.31352400 | -1.02469900 | 0.20018800  |
| H | -5.24085600 | -1.56932600 | 0.33629900  |
| C | -4.34949500 | 0.34109200  | -0.09133700 |
| H | -5.30573200 | 0.84482900  | -0.17890300 |
| F | 1.48651700  | 2.42565200  | 1.08125100  |

**TS4<sub>Cat4</sub>**

|   |             |             |             |
|---|-------------|-------------|-------------|
| C | 2.07067500  | 0.57428300  | -0.46954900 |
| O | 1.29923600  | 0.51545600  | 0.68868400  |
| H | 1.97480400  | -0.31205300 | -1.10574800 |
| N | 1.08806400  | 1.61161800  | -0.63498100 |
| S | -0.24052000 | 1.13430100  | -1.53778300 |
| O | -0.55237900 | -0.29619300 | -1.41129300 |
| O | -0.04699200 | 1.65632000  | -2.88933600 |
| C | -1.53981100 | 2.03680200  | -0.73453000 |
| C | -2.79168500 | 1.44105200  | -0.64609400 |
| C | -1.32049800 | 3.33607300  | -0.27863200 |
| C | -3.84164200 | 2.15970800  | -0.07934100 |
| H | -2.93743600 | 0.42816700  | -1.00939400 |
| C | -2.37792400 | 4.03278900  | 0.28786100  |
| H | -0.33313900 | 3.77796900  | -0.35587700 |
| C | -3.65115100 | 3.45775300  | 0.39498700  |
| H | -4.82297000 | 1.69886300  | -0.00444100 |
| H | -2.21739800 | 5.04242300  | 0.65595100  |
| C | -4.78201700 | 4.23647500  | 1.01417200  |
| H | -4.55355900 | 4.49394900  | 2.05269900  |
| H | -4.94963100 | 5.17378900  | 0.47596700  |

|             |             |             |             |
|-------------|-------------|-------------|-------------|
| H           | -5.71244800 | 3.66548000  | 1.00120600  |
| C           | 3.48475700  | 1.02564500  | -0.29044400 |
| C           | 3.76188100  | 2.19629500  | 0.41677600  |
| C           | 4.52322800  | 0.23304700  | -0.77077900 |
| C           | 5.08004000  | 2.57474400  | 0.63751800  |
| H           | 2.93540300  | 2.79377600  | 0.79025500  |
| C           | 5.84519300  | 0.61395300  | -0.54766900 |
| H           | 4.28948600  | -0.69747400 | -1.27902200 |
| C           | 6.12317200  | 1.78276800  | 0.15480400  |
| H           | 5.29955100  | 3.48447600  | 1.18747400  |
| H           | 6.65600200  | -0.00663300 | -0.91533000 |
| H           | 7.15309900  | 2.07748000  | 0.33136600  |
| C           | 2.11285700  | -1.03380000 | 2.06406000  |
| C           | 3.35670800  | -0.48744100 | 2.69736700  |
| H           | 1.19478800  | -0.99164300 | 2.63655700  |
| H           | 4.18979500  | -0.54581000 | 1.99232200  |
| H           | 3.22262100  | 0.56362200  | 2.97347000  |
| H           | 3.63956300  | -1.03695300 | 3.60456500  |
| O           | 3.20894200  | -2.33870800 | 0.38507900  |
| C           | 2.22238500  | -1.92164400 | 1.00030900  |
| C           | -0.46290800 | -3.51198200 | -1.14141900 |
| H           | -0.70656800 | -3.19658800 | -2.15786000 |
| H           | -0.68090700 | -4.57185700 | -0.99682000 |
| C           | -0.33073400 | -2.05753000 | 0.63736900  |
| N           | 0.93490600  | -2.37020100 | 0.39327500  |
| N           | -1.18249000 | -2.70600100 | -0.16459700 |
| C           | 1.00413100  | -3.15096300 | -0.83731900 |
| H           | 1.68041200  | -3.99383000 | -0.70768500 |
| S           | -1.12571300 | -1.01414500 | 1.75828600  |
| C           | -2.51546600 | -2.36071900 | -0.01764100 |
| C           | -2.67848300 | -1.46540800 | 1.04567600  |
| C           | -3.59858800 | -2.79815300 | -0.77218900 |
| H           | -3.45873300 | -3.48391900 | -1.60050100 |
| C           | -3.93860000 | -0.99288300 | 1.38905300  |
| H           | -4.06619600 | -0.28930000 | 2.20435200  |
| C           | -5.02726900 | -1.42918900 | 0.63897300  |
| H           | -6.02053500 | -1.07102800 | 0.88596500  |
| C           | -4.85663200 | -2.31477000 | -0.43016400 |
| H           | -5.71959200 | -2.63176700 | -1.00504000 |
| F           | 1.49108600  | -2.37755300 | -1.85581900 |
| <b>TS3'</b> |             |             |             |
| C           | -0.69025200 | 2.52932400  | -1.79058300 |
| C           | -1.04625900 | 3.91776500  | -2.26739600 |

|   |             |             |             |
|---|-------------|-------------|-------------|
| H | -0.32439600 | 1.77260300  | -2.46404400 |
| H | -0.18387200 | 4.41532300  | -2.72326500 |
| H | -1.84668700 | 3.89026500  | -3.01412100 |
| H | -1.38867800 | 4.54286200  | -1.43959800 |
| O | -1.04935000 | 2.33142200  | 0.64894300  |
| C | -0.82611200 | 2.22610900  | -0.50528000 |
| C | 0.74040100  | -2.09687500 | -0.15790600 |
| C | 1.82735500  | -3.12636800 | -0.14261800 |
| C | -0.13272600 | -0.07314700 | -0.57563400 |
| H | 1.76428700  | -3.74317100 | -1.05170300 |
| N | -0.51185700 | -2.22189500 | 0.15884100  |
| N | 1.00358200  | -0.82735900 | -0.60327300 |
| N | -1.01804100 | -0.96566100 | -0.10558100 |
| C | -2.40320900 | -0.69890400 | 0.14851900  |
| C | -2.80267100 | -0.46797600 | 1.46727100  |
| C | -3.29085900 | -0.66212800 | -0.92624900 |
| C | -4.15233200 | -0.21565200 | 1.69802600  |
| C | -4.63302200 | -0.40232100 | -0.64748900 |
| C | -5.08046200 | -0.18571600 | 0.65499100  |
| H | -4.48662900 | -0.02913600 | 2.71602200  |
| H | -5.34370400 | -0.36833000 | -1.46978500 |
| O | 3.08374400  | -2.48916600 | -0.05844000 |
| H | 1.72546900  | -3.77675000 | 0.72710000  |
| C | 3.30827500  | -1.55825600 | -1.10740900 |
| H | 3.21685800  | -2.06154600 | -2.07992900 |
| C | 2.33182200  | -0.36410200 | -0.97113000 |
| H | 2.24481900  | 0.16602200  | -1.92655400 |
| C | 4.68509600  | -0.93539100 | -0.85514100 |
| H | 5.10511800  | -0.55561300 | -1.79363300 |
| C | 4.37413000  | 0.19421300  | 0.10149300  |
| C | 3.01532700  | 0.50835100  | 0.06044500  |
| C | 5.22641100  | 0.88950100  | 0.94881700  |
| H | 6.28429400  | 0.64748100  | 0.99294100  |
| C | 4.69478400  | 1.89540100  | 1.75673100  |
| C | 2.47450100  | 1.50310000  | 0.86328500  |
| H | 1.41090300  | 1.72568700  | 0.84371600  |
| C | 3.33295200  | 2.19507000  | 1.71874700  |
| H | 2.93512500  | 2.97170500  | 2.36377000  |
| H | 5.34600700  | 2.44406900  | 2.42989600  |
| H | 5.37329600  | -1.68113900 | -0.45031000 |
| C | -1.78814900 | -0.46437500 | 2.57737400  |
| H | -1.27092500 | -1.42604600 | 2.64079600  |
| H | -1.03401300 | 0.30724900  | 2.39038800  |
| H | -2.26538900 | -0.25897600 | 3.53710600  |

|   |             |             |             |
|---|-------------|-------------|-------------|
| C | -2.80354900 | -0.86873100 | -2.33500300 |
| H | -2.18939000 | -0.01808700 | -2.64822600 |
| H | -2.18543800 | -1.76831400 | -2.41043100 |
| H | -3.64397000 | -0.96383500 | -3.02485900 |
| C | -6.54013400 | 0.05849800  | 0.94043100  |
| H | -6.66872500 | 0.82443400  | 1.70938200  |
| H | -7.07136700 | 0.38057500  | 0.04213900  |
| H | -7.02185400 | -0.85531800 | 1.30352300  |

**RI'**

|   |             |             |             |
|---|-------------|-------------|-------------|
| O | 1.86751300  | -0.26901500 | 0.00004600  |
| C | 0.76662900  | 0.12431000  | -0.00005300 |
| C | -0.46907500 | 0.56876100  | -0.00015000 |
| H | -0.56791400 | 1.64746000  | 0.00044500  |
| C | -1.68671300 | -0.33310700 | 0.00003000  |
| H | -1.72742600 | -0.97145100 | 0.88599100  |
| H | -2.58248200 | 0.28824900  | -0.00018300 |
| H | -1.72733300 | -0.97192400 | -0.88559000 |

**TS4'**

|   |             |             |             |
|---|-------------|-------------|-------------|
| C | 0.41010200  | 2.19726300  | -0.49676200 |
| H | 1.43399200  | 2.49431900  | -0.71430300 |
| C | -0.45547200 | 2.47038600  | -1.50933200 |
| C | -0.10502800 | 2.28941100  | 0.92795700  |
| H | 0.66734000  | 1.89574100  | 1.59106300  |
| H | -0.30834900 | 3.32210600  | 1.21938900  |
| H | -1.01229400 | 1.69036500  | 1.04461200  |
| O | -1.19631100 | 2.57732200  | -2.37806100 |
| C | 1.15107700  | -0.39374600 | 0.10131800  |
| O | 0.50018100  | 0.35777000  | -0.92670500 |
| H | 0.59454600  | -0.36134900 | 1.04961900  |
| N | 0.89898800  | -1.48401700 | -0.75356400 |
| S | -0.52758900 | -2.28963300 | -0.43474600 |
| O | -0.31321000 | -3.15449700 | 0.72727400  |
| O | -0.96610100 | -2.87603900 | -1.69422600 |
| C | -1.76200400 | -1.08916300 | 0.05843300  |
| C | -2.11927000 | -0.99532900 | 1.39639900  |
| C | -2.36150300 | -0.27885900 | -0.90589300 |
| C | -3.09268300 | -0.07061500 | 1.77736600  |
| H | -1.64869500 | -1.65316600 | 2.11998600  |
| C | -3.32236000 | 0.64060300  | -0.51105200 |
| H | -2.06817700 | -0.37482400 | -1.94683800 |
| C | -3.70551900 | 0.75477300  | 0.83470100  |
| H | -3.38313100 | 0.00202900  | 2.82152100  |

|   |             |             |             |
|---|-------------|-------------|-------------|
| H | -3.79675400 | 1.27502000  | -1.25563200 |
| C | -4.77832800 | 1.73277000  | 1.23568500  |
| H | -4.60500000 | 2.71497200  | 0.78760300  |
| H | -5.75832600 | 1.38727100  | 0.89239900  |
| H | -4.82459600 | 1.85086600  | 2.31996200  |
| C | 2.59312000  | -0.02407500 | 0.29145900  |
| C | 3.40610500  | 0.17230500  | -0.82699800 |
| C | 3.11822800  | 0.13362200  | 1.57143200  |
| C | 4.74021600  | 0.52189200  | -0.65930700 |
| H | 2.97699600  | 0.03882800  | -1.81559100 |
| C | 4.45796700  | 0.48143500  | 1.73869100  |
| H | 2.48161200  | -0.02914900 | 2.43818400  |
| C | 5.26716700  | 0.67665300  | 0.62427600  |
| H | 5.37462200  | 0.67100500  | -1.52722500 |
| H | 4.86717600  | 0.59811900  | 2.73686300  |
| H | 6.31019300  | 0.94770800  | 0.75278300  |
